# Supplementary material for: A survey of TB knowledge among medical students in Southwest China: is the information reaching the target?
Source: PubMed Central journal article supplement — BMJ Open. 2013 Sep 19;3(9):e003454. doi: 10.1136/bmjopen-2013-003454 (PMC3780336; doi:10.1136/bmjopen-2013-003454), 2013-09-19
Supplement: bmjopen-2013-003454.draft_revisions.pdf [file bmjopen-2013-003454.draft_revisions.pdf]

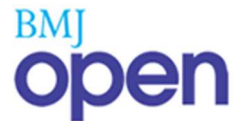

**A survey of TB knowledge among medical students in Southwest China: Is the information reaching the target?**

|                                 |                                                                                                                                                                                                                                                                                                                                                                                                                                                                                                                                               |
|---------------------------------|-----------------------------------------------------------------------------------------------------------------------------------------------------------------------------------------------------------------------------------------------------------------------------------------------------------------------------------------------------------------------------------------------------------------------------------------------------------------------------------------------------------------------------------------------|
| Journal:                        | <i>BMJ Open</i>                                                                                                                                                                                                                                                                                                                                                                                                                                                                                                                               |
| Manuscript ID:                  | bmjopen-2013-003454                                                                                                                                                                                                                                                                                                                                                                                                                                                                                                                           |
| Article Type:                   | Research                                                                                                                                                                                                                                                                                                                                                                                                                                                                                                                                      |
| Date Submitted by the Author:   | 21-Jun-2013                                                                                                                                                                                                                                                                                                                                                                                                                                                                                                                                   |
| Complete List of Authors:       | Zhao, Ying; Chengdu University of Traditional Chinese Medicine, School of Nursing<br>Ehiri, John; University of Arizona, Mel & Enid Zuckerman College of Public Health, Division of Health Promotion Sciences,<br>Li, Daikun; University-Town Hospital of Chongqing University of Medical Sciences, Department of Laboratory Medicine<br>Luo, Xinglun; Center of Disease Control in Shapingba District, Department of TB control<br>Li, Ying; Third Military Medical University, Department of Social Medicine and Health Service Management, |
| <b>Primary Subject Heading</b>: | Health services research                                                                                                                                                                                                                                                                                                                                                                                                                                                                                                                      |
| Secondary Subject Heading:      | Infectious diseases, Public health                                                                                                                                                                                                                                                                                                                                                                                                                                                                                                            |
| Keywords:                       | INFECTIOUS DISEASES, Public health < INFECTIOUS DISEASES, Tuberculosis < INFECTIOUS DISEASES                                                                                                                                                                                                                                                                                                                                                                                                                                                  |
|                                 |                                                                                                                                                                                                                                                                                                                                                                                                                                                                                                                                               |

SCHOLARONE™  
Manuscripts

only

1  
2  
3  
4 **A survey of TB knowledge among medical students in Southwest China: Is**  
5  
6 **the information reaching the target?**  
7  
8  
9

10 Ying Zhao<sup>1a</sup>

11 John Ehiri<sup>2a</sup>

12 Daikun Li<sup>3</sup>

13 Xinglun Luo<sup>4</sup>

14 Ying Li<sup>5§</sup>

15  
16  
17  
18  
19  
20  
21  
22  
23  
24  
25  
26  
27  
28 **§ Correspondence to:** Ying Li, Department of Social Medicine and Health Service  
29 Management, Third Military Medical University, Chongqing 400038, China.  
30  
31 (E-mail: [lilyliying2012@163.com](mailto:lilyliying2012@163.com); [yingli@email.arizona.edu](mailto:yingli@email.arizona.edu))  
32  
33

34 <sup>a</sup>Ying Zhao and John Ehiri contributed equally to this work.  
35  
36  
37  
38  
39  
40  
41  
42  
43  
44  
45  
46  
47  
48  
49  
50  
51  
52  
53  
54  
55  
56  
57  
58  
59  
60

## Abstract

**Objectives:** TB control in schools is a concern in low- and middle-income countries with high TB burdens. TB knowledge is recognized as important for TB control in China, which has one of the highest TB prevalence in the world. Accordingly, the country's 2008 National TB Control Guideline emphasized TB health education in schools as one of the core strategies for improving TB knowledge among the population. It was important to assess the level of TB knowledge in schools five years following implementation of the guideline, in order to determine if the information was reaching the targets.

**Design:** A cross-sectional study.

**Methods and study setting:** This survey assessed TB knowledge and access to TB health information by questionnaire survey among 1,486 medical undergraduates from medical universities in southwest China.

**Results:** Overall, the students had inadequate TB knowledge. Only 24.1%, 27.2%, and 34.1% of the students had knowledge of TB symptoms of cough/blood-tinged sputum, their local TB dispensaries, and free TB treatment policy, respectively. Very few (14.5%) had heard about the Directly Observed Therapy Short Course (DOTs), and only about half (54%) had ever accessed TB health education information. Exposure to health education messages was significantly associated with increased knowledge of the five core TB knowledge as follows: classic TB symptoms of cough/blood-tinged sputum ([OR(95%CI): 0.5(0.4, 0.7)], TB modes of transmission ([OR(95%CI): 0.4(0.3, 0.5)], curability of TB ([OR(95%CI): 0.6(0.5, 0.7)], location and services provided by TB local dispensaries ([OR(95%CI): 0.6(0.5, 0.8)], and the national free TB treatment policy ([OR(95%CI): 0.7(0.5, 0.8)].

1  
2  
3  
4 **Conclusions:** The findings pose the question of whether it is time for a rethink of the current  
5  
6 national and global approach to TB health education/promotion which favors promotion of  
7  
8 awareness on World TB Days rather than regular community sensitization efforts.  
9  
10

11  
12  
13 **Key words:** *Tuberculosis knowledge; undergraduate students; TB health promotion; China;*  
14  
15  
16  
17  
18  
19  
20  
21  
22  
23  
24  
25  
26  
27  
28  
29  
30  
31  
32  
33  
34  
35  
36  
37  
38  
39  
40  
41  
42  
43  
44  
45  
46  
47  
48  
49  
50  
51  
52  
53  
54  
55  
56  
57  
58  
59  
60

## ARTICLE SUMMARY

### Article focus:

- To describe knowledge of TB among undergraduate medical students.
- To explore factors associated with TB knowledge among undergraduate medical students.
- To attract attention to reform of school-based TB health education and promotion

### Key messages

- Overall, undergraduate medical students had inadequate TB knowledge.
- Undergraduate students had limited access to TB health education/promotion.
- A rethink of current national and global approaches to TB health education/promotion is urgently needed in the light of the current global burden of TB.

### Strengths and limitations of this study

- The main strength of the manuscript is the establishment of a baseline level of TB knowledge among undergraduate medical students. This is the first study to assess school-based TB health education/promotion in study area.
- The main limitation is that the study is cross-sectional which cannot assess TB knowledge changes before and after school TB health education/promotion.

## INTRODUCTION

The 16<sup>th</sup> Global Report on Tuberculosis (TB) published by WHO in 2012 showed that the Millennium Development Goal target for halting and reversing the TB epidemic by 2015 had already been achieved, with mortality and incidence rates falling in 22 high-burden countries. Nevertheless, the global burden of TB remains untenable,<sup>1</sup> in high-burden countries such as China. Globally, TB remains the second leading cause of death from infectious diseases (after HIV/AIDS).<sup>1</sup> Over the past five years, there has been a marked increase in the number of TB patients diagnosed with multi-drug resistant TB (MDR-TB).<sup>1</sup> China has the world's second largest tuberculosis epidemic and has contributed significantly to this MDR-TB increase. In recent years, the country has undertaken measures to control TB, and in order to evaluate the progress of TB control in the past decade, the country launched the 5th National Sampling Survey of TB Epidemiology in 2010.<sup>2</sup> Results of the survey showed an estimated 8.28 million cases of pulmonary TB (PTB) in the country from 2001 to 2010.<sup>2</sup> In spite of concerted international and national efforts to address TB in the country, annual prevalence (per 100,000 people) declined only minimally from 466 in 2000 to 459 in 2010.<sup>2</sup> Similarly, incidence of MDR-TB among PTB cases has remained unchanged in the past decade, and resistance to first-line drugs among newly diagnosed TB patients rose from 34.2 % in 2007/2008<sup>3</sup> to 36.9% in 2010.<sup>2</sup>

Owing to lack of TB knowledge, less than half of patients with TB symptoms seek healthcare timely.<sup>2</sup> Available evidence shows that only 59% TB patients comply with treatment, and

1  
2  
3 among the public, only 57% have proper TB knowledge.<sup>2</sup> Limited knowledge about signs  
4  
5 and symptoms of TB results in delays in TB diagnosis and treatment, which in return,  
6  
7 increases not only the risk of TB transmission, but also the development of MDR-TB.  
8  
9  
10  
11 China's MDR-TB prevalence rate of 6.8% is the highest in the world.<sup>2</sup>  
12  
13

14  
15  
16 TB control among undergraduate students is recognized as a concern in low- and  
17  
18 middle-income countries with high TB burdens. Undergraduate students usually live in  
19  
20 conditions of relative overcrowding that are conducive to TB outbreaks.<sup>4</sup> TB outbreaks  
21  
22 among students have been reported even in such low-endemicity countries as the UK, Italy,  
23  
24 Ireland, and the USA.<sup>5-9</sup> Chinese undergraduate students are recognized as a particularly  
25  
26 vulnerable population for TB. The TB prevalence (per 100,000) among Chinese students has  
27  
28 been reported to be as high as 1,520, which is significantly higher than the rate (459) for the  
29  
30 general population.<sup>10</sup> Chongqing, Guizhou, and Shanxi provinces were the three provinces  
31  
32 with the highest TB burden among undergraduate students between 2005 and 2008.<sup>11</sup> In  
33  
34 addition, several TB outbreaks among undergraduate students were recently reported in  
35  
36 Chongqing, Liangning, Zhejiang, Shangdong, and Guizhou, with the incidence rates ranging  
37  
38 from 620 to 31,370 per 100,000.<sup>10-16</sup>  
39  
40  
41  
42  
43  
44  
45  
46  
47  
48

49 University medical students can become exposed to TB infection during clinic rotations<sup>17</sup>.  
50  
51 Thus, adequate knowledge of the epidemiology and control is critically important for this  
52  
53 population group. Knowledge of TB among university medical undergraduates is also  
54  
55 important since they represent potential future physicians or leaders in the fight against TB.<sup>18</sup>  
56  
57  
58  
59  
60

1  
2  
3  
4 In 1998, WHO released a document following a workshop on Tuberculosis Control and  
5  
6 Medical Schools held in Rome, Italy, in 1997, which stressed the importance of graduating  
7  
8 medical students with proper knowledge and skills related to effective TB control.<sup>19</sup> WHO  
9  
10 later released a manual that aims to inform medical students and medical practitioners about  
11  
12 best practices in managing TB patients.<sup>20</sup> Several studies have documented inadequate TB  
13  
14 knowledge and poor compliance with TB treatment guidelines among practicing  
15  
16 physicians.<sup>21-23</sup> In countries where TB (including MDR-TB) presents significant challenges to  
17  
18 public health, equipping emerging physicians with in-depth TB knowledge is of critical  
19  
20 importance in the overall efforts to reduce the burden of the disease. In China, school TB  
21  
22 health promotion was emphasized in the 2008 National Guideline for TB Control.<sup>24</sup> It was  
23  
24 important to assess the level of TB knowledge in schools five years following  
25  
26 implementation of the guideline. This survey assessed TB knowledge and access to TB health  
27  
28 information among 1,486 pre-clinical undergraduate students from two medical universities  
29  
30 in southwest, China which has one of the highest burdens of TB in the country. It was hoped  
31  
32 that the findings could help to identify whether the information was reaching the targets, and  
33  
34 thus engender efforts to strengthen TB school education in the region and similar locales in  
35  
36 low and middle income countries with high TB burden.  
37  
38  
39  
40  
41  
42  
43  
44  
45  
46  
47  
48

## 49 **METHODS**

### 50 **Study setting**

51  
52 The study setting, Southwest China, includes Chongqing Municipality, the provinces of  
53  
54 Sichuan, Yunnan, Guizhou, and Tibet Autonomous Region (Figure 1) where prevalence rates  
55  
56  
57  
58  
59  
60



1  
2  
3  
4 (cases per 100,000) of active TB (695), smear positive TB (105), and culture positive TB  
5  
6 (198) are much higher than the national prevalence rates of 459, 66, and 119, respectively.<sup>2</sup>  
7  
8  
9 Southwest China has a population of more than 19 million which represent more than 10 %  
10  
11 of China's population of 1.3 billion people.  
12

### 13 **Participants**

14  
15  
16 There were 10 medical universities in Southwest China. These universities offer 5-year  
17  
18 majors in clinical medicine, public health, pharmacy, medical laboratory, Chinese medicine,  
19  
20 and nursing. We randomly selected two of the 10 universities and restricted our sample frame  
21  
22 to pre-clinical students in their first to third years of training. We excluded fourth- and  
23  
24 fifth-year students since they may have received clinical training on TB as part of their  
25  
26 curriculum rather than from government school TB health education. The survey was  
27  
28 conducted between November 2011 and May 2012 and focused on the assessment of TB  
29  
30 knowledge among the respondents. The sample frame consisted 20,000 eligible students. To  
31  
32 obtain a power of 80% and a confidence level of 95%, we calculated the study sample to be  
33  
34 1536.<sup>25</sup> During recruitment, potential participants were approached and provided with  
35  
36 detailed explanation of the study and its objectives. They were then asked if they would be  
37  
38 interested in volunteering to participate. Those who expressed interest were asked to read the  
39  
40 informed consent form, and were assured of confidentiality. They were then asked to sign the  
41  
42 informed consent form as a conformation of their voluntary participation in the study. The  
43  
44 ethics committees of the two study universities approved the study protocol prior to its  
45  
46 implementation.  
47  
48  
49  
50  
51  
52  
53  
54  
55  
56  
57  
58  
59  
60

## Questionnaire

The survey was cross-sectional in design. Following participant enrollment in the study, data were collected by means of a self-administered questionnaire that assessed participants' knowledge about TB transmission, management, and control. Data were elicited on the following variables: socio-demographic profile (age, sex), major, year in the medical program, (signs and symptoms, mode of transmission, knowledge about TB control facilities in the study setting, local TB prevention, management, and control policies and program), and core knowledge of TB, namely, five core TB knowledge areas which include: (i) classic TB symptoms of cough/blood-tinged sputum, (ii) TB modes of transmission, (iii) curability of TB, (iv) location and services provided by TB local dispensaries, and (v) the national free TB treatment policy.

## Data analysis

Epi-data 6.0 was used for data entry, and analyses were conducted, using the Statistical Package for Social Sciences version 18.0. To assess TB knowledge among the participants, we calculated the percentage of people who provided correct responses to questions about the 5 core knowledge of TB, 6 symptoms of TB, 2 ways of transmitting TB, 4 items of the free TB treatment policy in China, and 5 contents of DOTS. We used chi-square statistics ( $\chi^2$ ) to assess participants' responses by gender, year in medical school, and program major.

Multiple logistic regression models were used to examine factors associated with core knowledge of TB among the respondents. We used a two-tailed probability level of  $<0.05$  as the level of statistical significance.

## RESULTS

### Demographic characteristics of participants

A total of 1,486 undergraduate medical students participated in the survey. Of these, 470 were in their first year medical training, 399 in the second year, and 617 in the third year. A majority of the respondents (74.2%; n=1102) were male, and 68.4% students were majoring in clinical medicine. Only 54% of the students indicated having access to some kind of TB health information (Table1).

### Knowledge of TB symptoms

Survey results showed that as many as 91% of the students had heard of TB. In spite of this, about 18% (n=261) had no knowledge of any TB symptoms; less than 10% (n=132) were able to identify all of the TB symptoms (Figure 2 A). Only 50.9% and 40% could identify the two key TB symptoms of blood-stained sputum, and chronic cough lasting 3 weeks. Only 20% knew other TB symptoms such as fever, weakness, and weight loss (Table 2).

Third-year students had better knowledge of TB symptoms ( $p \leq 0.05$ ), and there were no statistically significant differences between students in clinical and non-clinical majors ( $p > 0.05$ ) (Table 2).

### Knowledge about TB transmission

Only 27.9% (n=414) of the respondents were aware that TB could be transmitted through

1  
2  
3  
4 exposure to droplet nuclei from the cough of an infected person; and slightly more than half  
5  
6 (56.6%; n=841) knew that sneezing by TB patients could release droplet nuclei that could  
7  
8 transmit the disease to others (Table 2). Only 14.7% (n=218) of the students knew the two  
9  
10 main routes of TB transmission (Figure 2b). Overall, more females (88%; n=338) and  
11  
12 third-year students (86.1%; n=531) knew the transmission routes of TB ( $p<0.05$ ).  
13  
14  
15  
16  
17  
18

### 19 **Knowledge about TB treatment and policies**

20  
21 Although 80% of the students knew that TB was curable, only 30% (n=446) knew the  
22  
23 treatment course of TB. Only 27.2% (n=404) knew their local TB control facilities; 34% and  
24  
25 14.5% had heard of the national free TB treatment policy and DOTS, respectively (Table 2).  
26  
27

28  
29 A greater proportion of female than male respondents had better knowledge about the TB  
30  
31 treatment course (32.8% vs 28.5%), TB control facilities (35.7% vs 24.4%), free TB  
32  
33 treatment policy (41.9% vs 31.4%), and DOTS (19.0% vs 12.9%) ( $P\leq 0.05$ ). Overall,  
34  
35 third-year students had better knowledge of TB treatment except for knowledge on TB  
36  
37 control facilities. There were no significant differences between students in clinical and  
38  
39 non-clinical majors (Table 2). Only 12% (n=178) of the respondents knew all the 4 items  
40  
41 included in the free TB treatment policy (registration, sputum test, chest X-rays, and anti-TB  
42  
43 drugs); 58% (n=862) did not know any items included in the free policy (Figure 3 A). Less  
44  
45 than 10% (n=106) of the students were familiar with all 5 items of DOTS (Figure 3 B).  
46  
47  
48  
49  
50  
51  
52  
53

### 54 **Core knowledge of TB**

55  
56 With regard to core knowledge of TB, only 24.1% (n=358), 27.2% (n=404), and 34.1%  
57  
58  
59  
60

1  
2  
3  
4 (n=506) of the students had knowledge of TB symptoms of cough/blood-tinged sputum, their  
5  
6 local TB dispensaries, and free TB treatment policy, respectively (Figure 4A). Only 2.4%  
7  
8 (n=36) were familiar with all five core TB knowledge areas (Figure 4B). Multiple logistic  
9  
10 regression analysis indicated that access to health education was associated with knowledge  
11  
12 of the five core TB knowledge areas, (OR [(95%CI): 0.5(0.4, 0.7)] for classic TB symptoms  
13  
14 of cough/blood-tinged sputum, (OR [(95%CI): 0.4(0.3, 0.5)] for TB modes of transmission,  
15  
16 (OR [(95%CI): 0.6(0.5, 0.7)] for curability of TB, (OR [(95%CI): 0.6(0.5, 0.8)] for location  
17  
18 and services provided by TB local dispensaries, and (OR [(95%CI): 0.7(0.5, 0.8)] for the  
19  
20 national free TB treatment policy. Males had poor knowledge related to transmission of TB,  
21  
22 TB dispensaries and free TB treatment policy (OR (95%CI): 1.8(1.3, 2.7), 1.7(1.3, 2.4),  
23  
24 1.9(1.5, 2.4), respectively. Third year students had better knowledge of TB compared with  
25  
26 students in the first and second years (Table 3).  
27  
28  
29  
30  
31  
32

### 33 34 **Sources of TB Knowledge**

35  
36 With regard to how the respondents gained awareness and understanding of TB, survey  
37  
38 results indicated that the most frequent source of information was textbooks, the second was  
39  
40 the Internet, and the third was the media (newspaper and billboards) (Figure 5).  
41  
42  
43  
44  
45

## 46 **DISCUSSION**

47  
48 TB is still one of the most important global public health threats. If global control of the  
49  
50 disease does not improve, the annual global incidence is expected to increase from the current  
51  
52 21% to 61% by 2020.<sup>26</sup> Early detection and adequate treatment are critical control measures.  
53  
54

55  
56 In spite of the fact that China carries one of the highest TB burdens in the world, lack of  
57  
58  
59  
60

1  
2  
3  
4 knowledge about the disease remains an abiding problem in the country, and thus, presents a  
5  
6 barrier to control efforts.<sup>2</sup>  
7  
8  
9

10  
11 Medical students are China's future health professionals and clinical leaders. Thus,  
12  
13 understanding their level of awareness about TB is important. Unfortunately, this survey  
14  
15 revealed that these students had generally poor knowledge of TB.  
16  
17

18  
19 Similar surveys conducted in other countries have reported inadequate knowledge of TB  
20  
21 among medical professional students. In Turkey for example,<sup>27</sup> a study of 828 fourth-year  
22  
23 medical students found that they lacked skills in interpreting radiology and smears even in  
24  
25 their last year of medical school. One study in Brazil found that medical students had poor  
26  
27 knowledge of TB transmission and engaged in risky behaviors.<sup>28</sup> Similarly, a study in the  
28  
29 United States reported that, prior to implementation of the National Tuberculosis Curriculum  
30  
31 Consortium (NTCC) in U.S. medical schools, about one-third of medical students did not  
32  
33 know the method for administering tuberculin skin test or that the BCG vaccine was not a  
34  
35 contraindication to TB skin testing.<sup>29</sup>  
36  
37  
38  
39  
40  
41  
42  
43

44 The 2008 National Guideline for TB Control in China emphasizes five items of core  
45  
46 knowledge of TB.<sup>24</sup> In the present study, it is of particular concern that the students scored  
47  
48 very low in the TB core knowledge domain. The average knowledge base for all of the 5 core  
49  
50 knowledge domains was only 2.4%, which was lower than the score (43.45%) reported in a  
51  
52 previous study in China's Hunan province.<sup>30</sup> We also found that only 24.1% knew the classic  
53  
54 symptoms of TB (cough and blood stained sputum), which was similar to the report in  
55  
56  
57  
58  
59  
60

1  
2  
3 Nanjing, China where only 26.3% students were familiar with TB symptoms.<sup>31</sup> Less than  
4  
5  
6 30% of the respondents knew the course of TB treatment and were aware of TB control  
7  
8 facilities in Southwest China. This was lower than the rate observed in a previous study by  
9  
10 Zhang et al. (2012). We found that only 30% knew the free TB treatment policy in China,  
11  
12 which is similar to that reported in a related study.<sup>32</sup> One-third of our respondents could not  
13  
14 identify a mode of transmission for TB. A survey of final year medical students in China's  
15  
16 Hunan province in 2000 concluded that knowledge and practical competencies regarding TB  
17  
18 among final-year medical students were generally inadequate.<sup>33</sup> Results of our current study  
19  
20 showed that the situation has not improved in the past 13 years.  
21  
22  
23  
24  
25  
26  
27  
28

29 TB education has been widely recognized as an effective way to promote TB knowledge  
30  
31 among students. In 2003, the U.S. National Institutes of Health (NIH) perceived a need to  
32  
33 strengthen the teaching of TB to health-profession students, and funded the National  
34  
35 Tuberculosis Curriculum Consortium (NTCC) to help address this need.<sup>29</sup> Evidence shows  
36  
37 that this has contributed to marked improvement in TB knowledge among students  
38  
39 throughout the.<sup>29, 34-35</sup> Strong recommendations to strengthen TB knowledge of medical and  
40  
41 other health-professions students through education have also been made by other countries .  
42  
43  
44  
45  
46 <sup>36</sup> Although the 2008 National Guideline for TB Control in China emphasizes TB health  
47  
48 education and promotion for the public, TB patients, and students, TB health education and  
49  
50 promotion in universities remain sub-optimal .<sup>24</sup> Findings from many studies have shown  
51  
52 that 40%-63.7% of students reported "hearing from others" as their primary source of  
53  
54 information about TB.<sup>31,36</sup> This study also found that only 54% students had ever received  
55  
56  
57  
58  
59  
60

1  
2  
3  
4 TB health education. Accessing TB health education was significantly associated with core  
5  
6 knowledge of TB. Given that non-clinical students have less opportunity to learn about TB as  
7  
8 part of their regular curriculum, school TB health education should be seen as a primary  
9  
10 source of information on TB for them.  
11

## 12 13 **CONCLUSION**

14  
15  
16  
17  
18 In countries with high TB burden, it is important that all opportunities to raise population  
19  
20 awareness about the disease are used to the optimum. In line with the WHO settings approach  
21  
22 to health promotion,<sup>19</sup> schools should be seen as important avenues for TB health education  
23  
24 given the multiplier effect such intervention is likely to have on the students, their families,  
25  
26 communities and others in their social networks.<sup>19</sup> Unfortunately, there is the tendency to  
27  
28 focus promotion of TB awareness on national/global TB Control Days to the neglect of a  
29  
30 plethora of opportunities for ongoing promotion in diverse settings. The overall poor  
31  
32 knowledge of TB among medical and health-professions students demonstrated by this study  
33  
34 supports the need to increase TB school health education, especially in the light of recent  
35  
36 outbreaks of TB in universities in Southwest China.<sup>12,16</sup> Given the high burden of TB in  
37  
38 southwest China, especially in rural provinces, TB health education and promotion in schools  
39  
40 should be strengthened on an ongoing basis and in coordination with local TB control  
41  
42 departments and district-level Centers for Disease Control and Prevention (CDC). There is a  
43  
44 need for targeted efforts to educate students about TB since the students can be a major  
45  
46 source of information to rural dwellers, including their own families and others in their  
47  
48 circles of influence.  
49  
50  
51  
52  
53  
54  
55  
56  
57  
58  
59  
60



**Author affiliations**

<sup>1</sup>School of Nursing, Chengdu University of Traditional Chinese Medicine, Chengdu, Sichuan Province, China.

<sup>2</sup>Mel & Enid Zuckerman College of Public Health, Division of Health Promotion Sciences, University of Arizona, Tucson, AZ, USA.

<sup>3</sup>Department of Laboratory Medicine, University-Town Hospital of Chongqing University of Medical Sciences, No. 55 Daxuecheng Road, Shapingba District, Chongqing, China.

<sup>4</sup>Department of TB control, Center of Disease Control in Shapingba District, Chongqing, PR China.

<sup>5</sup>Department of Social Medicine and Health Service Management, Third Military Medical University, No.30 Gaotanyan Road, Shapingba District, Chongqing, China.

**Contributors** YL designed this survey, JE guided the questionnaire design and data collection, YZ, DL and XL collected data, DL managed data, YZ analyzed data. YZ and YL drafted the manuscript; JE edited the manuscript. All authors interpreted the results, revised the report and approved the final version.

**Funding:** the present study was funded by National Natural Science Foundation of China (Award #: 81001297)

**Competing interests** None.

**Ethics approval** The ethics committees of the two study universities approved the study protocol prior to its implementation.

**Data sharing statement** No additional data are available.

## References

1. World Health Organization, 2012. Global Tuberculosis report.  
[http://apps.who.int/iris/bitstream/10665/75938/1/9789241564502\\_eng.pdf](http://apps.who.int/iris/bitstream/10665/75938/1/9789241564502_eng.pdf)
2. Wang Y. Report of the fifth national sampling survey of TB epidemiology. Beijing: Military Medical Science Press. 2011;1-7.
3. Zhao Y, Xu S, Wang L, et al. National survey of drug-resistant tuberculosis in China. *N Engl J Med* 2012; 366:2161–2170
4. Barbara V. *Epidemiology in Health Care* (3rd Edition). NJ: Prentice Hall;1998
5. The Lodi Tuberculosis Working Group. A school- and community-based outbreak of *Mycobacterium tuberculosis* in northern Italy, 1992-3. *Epidemiol Infect* 1994; 113: 83-93.
6. Ridzon R, Kent JH, Valway S, et al. Outbreak of drug-resistant tuberculosis with second-generation transmission in a high school in California. *J Pediatr* 1997; 131: 863-868.
7. Hoge CW, Fisher L, Donnell HD Jr, et al. Risk factors for transmission of *Mycobacterium tuberculosis* in a primary school outbreak: lack of racial difference in susceptibility to infection. *Am J Epidemiol* 1994; 139: 520-530.
8. Quigley C. Investigation of tuberculosis in an adolescent. The Outbreak Control Team. *Common Dis Rep CDR Revl* 1997; 7: R113-R116.
9. Shannon A, Kelly P, Lucey M, et al. Isoniazid resistant tuberculosis in a school outbreak: the protective effect of BCG. *Eur Respir J* 1991; 4: 778-782.

- 1  
2  
3  
4 10. Wang H, Pan JP, Zhang TH, et al. Survey on the knowledge, attitude and behaviors of TB  
5 among college students. *Chinese Journal of Public health* 2006; 22( 6): 661-662.  
6  
7  
8  
9 11. Du X, Chen W, Huang F. Analysis on TB of national report of students TB during  
10 2004-2008. *Chinese health education* 2009; 25(11):803-805.  
11  
12  
13 12. Zhou S, Chen M. Epidemiology survey on outbreaks of TB in the universities in  
14 Chongqing. *Health Medicine Research and Practice in Higher Institutions*  
15 2005;2(2):7-10.  
16  
17  
18  
19 13. Bi HY, Meng W, Liu DS. Epidemiology survey on outbreaks of TB in universities in  
20 Dandong city. *Chinese journal of health laboratory technology* 2005; 15(11):1377  
21  
22  
23  
24 14. Wu M, Luo J, Lu M, et al. Epidemiology survey on outbreak of TB in university in  
25 Hangzhou city. *Journal of medical research* 2006; 35(6): 61-63.  
26  
27  
28  
29 15. Lu QQ, Ju YX, Li YY. Survey on outbreak of TB in university. *Chinese journal of school*  
30 *health* 2007; 28(12): 1147.  
31  
32  
33  
34 16. Lan MB, Yu YL: Zhang HW. Epidemiology survey on outbreak of TB in university in  
35 Guizhou province. *Chinese modern doctor* 2009; 47(29):102-103.  
36  
37  
38  
39 17. Silva VM, Cunha AJ, Kritski AL. Tuberculin skin test conversion among medical  
40 students at a teaching hospital in Rio de Janeiro, Brazil. *Infect Control Hosp Epidemiol*  
41 2002; 23:591-594.  
42  
43  
44  
45 18. Mehta D, Bassi R, Singh M, et al. To study the knowledge about tuberculosis  
46 management and national tuberculosis program among medical students and aspiring  
47 doctors in a high tubercular endemic country. *Ann Trop Med Public Health* 2012; 5:206-8.  
48  
49  
50  
51  
52  
53  
54  
55 19. WHO. Tuberculosis control and medical schools. Report of a WHO Workshop, Rome,  
56  
57  
58  
59  
60

- 1  
2  
3  
4 Italy 29-31 October 1997. [http://whqlibdoc.who.int/hq/1998/WHO\\_TB\\_98.236.pdf](http://whqlibdoc.who.int/hq/1998/WHO_TB_98.236.pdf)  
5  
6 20. Nadia AK, Donald A E. Tuberculosis. A manual for medical students. World Health  
7  
8 Organization 2005, WHO/CDS/TB/99.272.  
9  
10  
11 21. Arif K, Ali SA, Amanullah S. Physician compliance with national tuberculosis treatment  
12  
13 guidelines: A university hospital study. *Int J Tuberc Lung Dis* 1997; 2:2225-30.  
14  
15  
16 22. LoBue PA, Moser K, Catanzaro A. Management of tuberculosis in San Diego County: A  
17  
18 survey of physicians' knowledge, attitudes and practices. *Int J Tuberc Lung Dis* 2001;  
19  
20 5:933-8.  
21  
22  
23 23. Khan JA, Zahid S, Khan R, et al. Medical interns' knowledge of TB in Pakistan. *Trop*  
24  
25 *Doct* 2005; 35:144-7.  
26  
27  
28 24. Center for Disease Control in China, 2008. The operational guideline for Tuberculosis  
29  
30 control program in China, 2008. Beijing: Ministry of Health. 101-105.  
31  
32  
33 25. Braden CR. Infectiousness of a university student with laryngeal and cavitary tuberculosis.  
34  
35 Investigative team. *Clin Infect Dis*. 1995; 21: 565-70.  
36  
37  
38 26. Dye C, Garnett GP, Sleeman K, et al. Prospects for worldwide tuberculosis control under  
39  
40 the WHODOTS strategy. *Lancet* 1998; 352:1886-91.  
41  
42  
43 27. Kilicaslan Z, Kiyani E, Erkan F, et al. Evaluation of undergraduate training on  
44  
45 tuberculosis at Istanbul Medical School. *Int J Tuberc Lung Dis* 2003; 7:159-164.  
46  
47  
48 28. Teixeira EG, Menzies D, Cunha AJ, et al. Knowledge and practices of medical students to  
49  
50 prevent tuberculosis transmission in Rio de Janeiro, Brazil. *Rev Panam Salud Publica*.  
51  
52 2008; 24(4):265-70.  
53  
54  
55  
56  
57  
58  
59  
60

- 1  
2  
3  
4 29. Jackson M, Harrity S, Hoffman H, Catanzaro A. A survey of health-profession students for  
5  
6 knowledge, attitudes, and confidence about tuberculosis, 2005. *BMC Public Health* 2007;  
7  
8 7:219.  
9  
10  
11 30. Feng SD, Yang SQ, Ling HY. Investigation on knowledge, attitude and behavior  
12  
13 regarding tuberculosis in university students in Hengyan City. *Chin J School Doctor* 2011;  
14  
15 25(11):815-817.  
16  
17  
18 31. Zhang Z, Zhang XN, Cao SY, et al. Cognition of tuberculosis related knowledge and  
19  
20 attitude among college students in Nanjing. *Chin J Sch Health* 2012;33 (3): 263-264.  
21  
22  
23 32. Yan HY. Survey on the knowledge, attitude and behaviors related to TB among  
24  
25 undergraduate students in universities. *Chin J Sch Health* 2009; 30(7):639.  
26  
27  
28 33. Bai LQ, Ziao SY, Xie HW, et al. Knowledge and practice regarding tuberculosis among  
29  
30 final-year medical students in Hunan, China. *Zhonghua Jie He He Hu Xi Za Zhi* 2003;  
31  
32 26(8):458-461.  
33  
34  
35 34. Harrity S, Jackson M, Hoffman H, et al. The National Tuberculosis Curriculum  
36  
37 Consortium: a model of multi-disciplinary educational collaboration. *Int J Tuberc Lung*  
38  
39 *Dis.* 2007; 11(3):270-4.  
40  
41  
42 35. Jensen PA. Where should infection control programs for tuberculosis begin? *Int J Tuberc*  
43  
44 *Lung Dis* 2005; 9:825.  
45  
46  
47 36. Fu L, Tian M, Pan R, et al. Investigation on College Student' Knowledge, Confidence and  
48  
49 Behavior about Prevention and Treatment for Tuberculosis in Chengdu. *Parasitoses and*  
50  
51 *Infectious Diseases* 2008; 6(4):185-187.  
52  
53  
54  
55  
56  
57  
58  
59  
60

## Tables

**Table1 Demographic characteristics of undergraduates surveyed in medical universities in southwest China (n=1486)**

| Demographic factors           | N                   | %    |      |
|-------------------------------|---------------------|------|------|
| Sex                           | Male                | 1102 | 74.2 |
|                               | Female              | 384  | 25.8 |
| Grade                         | Year 1              | 617  | 41.5 |
|                               | Year 2              | 399  | 26.9 |
|                               | Year 3              | 470  | 31.6 |
| Major                         | Clinic medicine     | 1017 | 68.4 |
|                               | Non-clinic medicine | 469  | 31.6 |
| Access to TB health education | Yes                 | 802  | 54   |
|                               | No                  | 684  | 45   |

**Table 2 Knowledge about TB symptoms, transmission and treatment among undergraduates in medical university in Southwest China\***

| Knowledge of TB                     | Total n (%) | Sex n (%)  |              | Grade n (%) |            |             | Major n (%)     |                     |
|-------------------------------------|-------------|------------|--------------|-------------|------------|-------------|-----------------|---------------------|
|                                     |             | Male       | Female       | Year 3      | Year 2     | Year 1      | Clinic medicine | Non-clinic medicine |
| <b>Knowledge on TB symptoms</b>     |             |            |              |             |            |             |                 |                     |
| Chronic cough                       | 597(40.2)   | 501(45.5)  | 96(25.0)*    | 262(42.5)   | 118(29.6)  | 217(46.0)*  | 399(39.2)       | 198(42.2)           |
| Blood-tinged sputum                 | 756(50.9)   | 608(55.2)  | 148(38.5)*   | 332(53.8)   | 176(44.2)  | 248(52.9)*  | 509(50.0)       | 247(52.8)           |
| Fever                               | 371(25.0)   | 298(27.1)  | 73(19.0)*    | 204(33.1)   | 73(18.4)   | 94(20.0)*   | 269(26.5)       | 102(21.7)           |
| Night sweats                        | 328(22.1)   | 265(24.1)  | 63(16.4)*    | 209(33.9)   | 54(13.6)   | 65(13.8)*   | 235(23.1)       | 93(19.8)            |
| Weakness                            | 398(26.8)   | 348(31.6)  | 50(13.0)*    | 212(34.4)   | 73(18.3)   | 113(24.0)*  | 270(26.5)       | 128(27.3)           |
| Weight loss                         | 318(21.4)   | 286(26.0)  | 32(8.3)*     | 190(30.8)   | 43(10.8)   | 85(18.1)*   | 220(21.7)       | 98(20.9)            |
| <b>Knowledge on TB transmission</b> |             |            |              |             |            |             |                 |                     |
| Known of transmission               | 1231(82.8)  | 893 (81.0) | 338 (88.0)*  | 531 (86.1)  | 316 (79.4) | 384 (81.5)* | 854 (84.0)      | 377(80.4)           |
| Cough                               | 414(27.9)   | 338(30.7)  | 76(19.8)*    | 186(30.1)   | 92(23.1)   | 136(29.0)   | 293(28.8)       | 121(25.8)           |
| Sneezing and loudly speaking        | 841(56.6)   | 607(55.1)  | 234(60.9)*   | 386(62.6)   | 191(48.0)  | 264(56.3)*  | 597(58.8)       | 244(52.0)*          |
| <b>Knowledge on TB treatment</b>    |             |            |              |             |            |             |                 |                     |
| Curable disease                     | 1183(79.6)  | 891 (81.0) | 292 (76.0)*  | 477 (77.3)  | 318 (80.1) | 388 (82.6)* | 802 (79.0)      | 381(81.4)           |
| Knowing treatment course            | 439(29.5)   | 313 (28.5) | 126 (32.8)*  | 207 (33.5)  | 109 (27.5) | 123 (26.2)* | 304 (30.0)      | 135(28.8)           |
| Knowing TB dispensary               | 404(27.2)   | 267 (24.4) | 137 (35.7)*  | 169 (27.4)  | 108 (27.1) | 127 (27.0)  | 270 (26.5)      | 134(28.6)           |
| TB free policy                      | 506(34.1)   | 345 (31.4) | 161 (41.9) * | 197 (31.9)  | 123 (31.1) | 186 (39.5)* | 356 (35.1)      | 150(32.0)           |
| Heard of DOTS                       | 215(14.5)   | 142(12.9)  | 73(19.0)*    | 110(17.8)   | 55(13.9)   | 50(10.8)*   | 148 (14.6)      | 67(14.3)            |

\* $\chi^2$  test used to compare between males and females, different grades, and different majors.

\*P <0.05

**Table 3 Factors associated with the core knowledge of TB among undergraduates in medical university in Southwest China**

| Factors                              | OR (95%CI)                                   |                              |                           |               |                |
|--------------------------------------|----------------------------------------------|------------------------------|---------------------------|---------------|----------------|
|                                      | TB symptoms of cough and blood-tinged sputum | TB as one infectious disease | TB as one curable disease | TB dispensary | TB free policy |
| <b>Gender</b>                        |                                              |                              |                           |               |                |
| Female                               | Reference                                    | Reference                    | Reference                 | Reference     | Reference      |
| Male                                 | 0.1(0.1, 0.2)                                | 1.8(1.3, 2.7)                | 0.8(0.6, 1.1)             | 1.7(1.3, 2.4) | 1.9(1.5, 2.4)  |
| <b>Grade</b>                         |                                              |                              |                           |               |                |
| Year 1                               | Reference                                    | Reference                    | Reference                 | Reference     | Reference      |
| Year 2                               | 1.6(1.5, 1.9)                                | 1.7(1.5, 1.9)                | 1.3(0.9, 1.8)             | 1.1(0.8, 1.5) | 1.6(1.2, 2.0)  |
| Year 3                               | 1.8(1.2,2.6)                                 | 1.2(0.8,1.7)                 | 1.1(0.7, 1.5)             | 1.1(0.8, 1.6) | 1.7(1.2, 2.3)  |
| <b>Major</b>                         |                                              |                              |                           |               |                |
| Clinic medicine                      | Reference                                    | Reference                    | Reference                 | Reference     | Reference      |
| Non-clinic medicine                  | 1.1(0.8, 1.4)                                | 1.7(0.5, 1.9)                | 1.2(0.9, 1.6)             | 1.1(0.8, 1.4) | 0.8(0.6, 1.1)  |
| <b>Access to TB health education</b> |                                              |                              |                           |               |                |
| Yes                                  | Reference                                    | Reference                    | Reference                 | Reference     | Reference      |
| No                                   | 0.5(0.4, 0.7)                                | 0.4(0.3, 0.5)                | 0.6(0.5, 0.7)             | 0.6(0.5, 0.8) | 0.7(0.5, 0.8)  |



## Figure legends

### **Fig. 1: The Southwestern People's Republic of China.**

In this this figure demonstrated Southwest China. The place marked with red color is Southwest China which includes the municipality of Chongqing, the provinces of Sichuan, Yunnan and Guizhou, and the Tibet Autonomous Regions.

### **Fig. 2: Knowledge of TB symptoms and transmission among undergraduate medical students in Southwest China.**

Figure 2A presents undergraduate medical students' knowledge of classical symptoms of TB; Figure 2B presents students' knowledge of means of TB transmission.

### **Fig. 3: Knowledge of TB free policy and DOTS among undergraduate medical students in Southwest China.**

Figure 3A presents undergraduate medical students' knowledge of the free TB treatment policy in China; Figure 3B presents undergraduate medical students' knowledge of the contents of the Directly Observed Therapy-Short Course (DOTS) program.

### **Fig. 4: Knowledge of core TB knowledge among undergraduate medical students in Southwest China.**

Figure 4A presents the percentage of undergraduate medical students correctly answered each question for core TB knowledge; Figure 4B presents percentage of undergraduate medical students correctly answered none, only one question, any 2, any 3, any4 and any 5 questions for core TB knowledge.

This figure presents undergraduate medical students' knowledge of core TB symptoms

**Fig. 5: Sources of TB knowledge among undergraduate medical students in Southwest**

**China.**

This figure presents undergraduate medical students' major sources of information on TB.

For peer review only

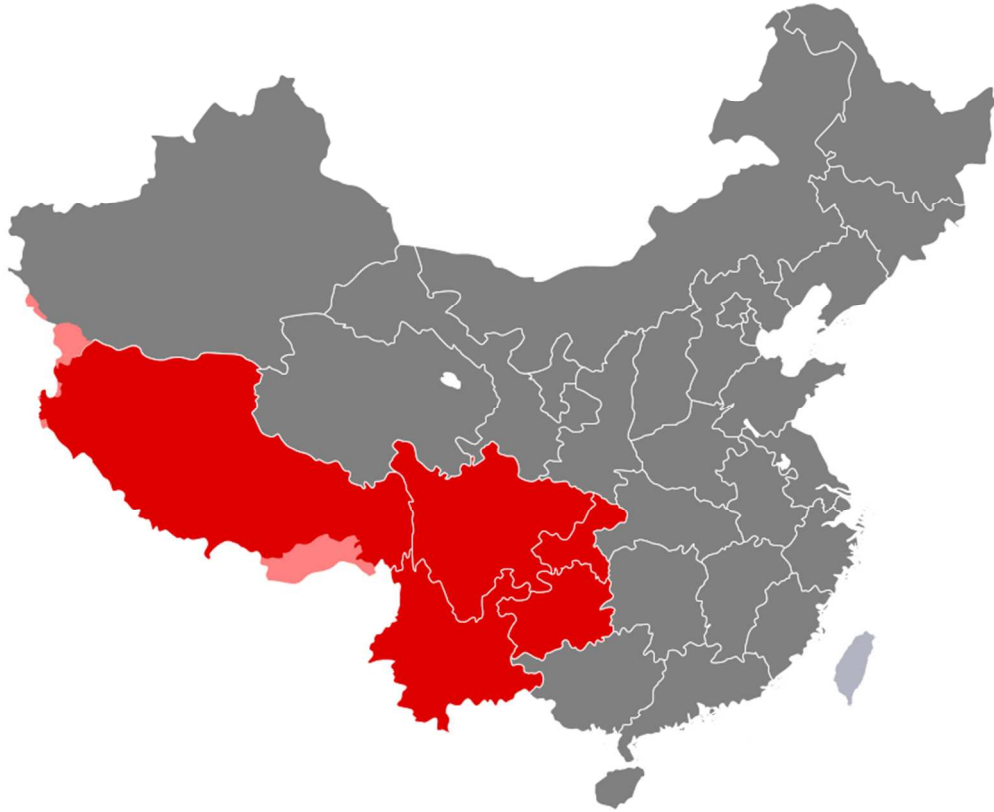

72x59mm (300 x 300 DPI)

ew only

1  
2  
3  
4  
5  
6  
7  
8  
9  
10  
11  
12  
13  
14  
15  
16  
17  
18  
19  
20  
21  
22  
23  
24  
25  
26  
27  
28  
29  
30  
31  
32  
33  
34  
35  
36  
37  
38  
39  
40  
41  
42  
43  
44  
45  
46  
47  
48  
49  
50  
51  
52  
53  
54  
55  
56  
57  
58  
59  
60

1  
2  
3  
4  
5  
6  
7  
8  
9  
10  
11  
12  
13  
14  
15  
16  
17  
18  
19  
20  
21  
22  
23  
24  
25  
26  
27  
28  
29  
30  
31  
32  
33  
34  
35  
36  
37  
38  
39  
40  
41  
42  
43  
44  
45  
46  
47  
48  
49  
50  
51  
52  
53  
54  
55  
56  
57  
58  
59  
60

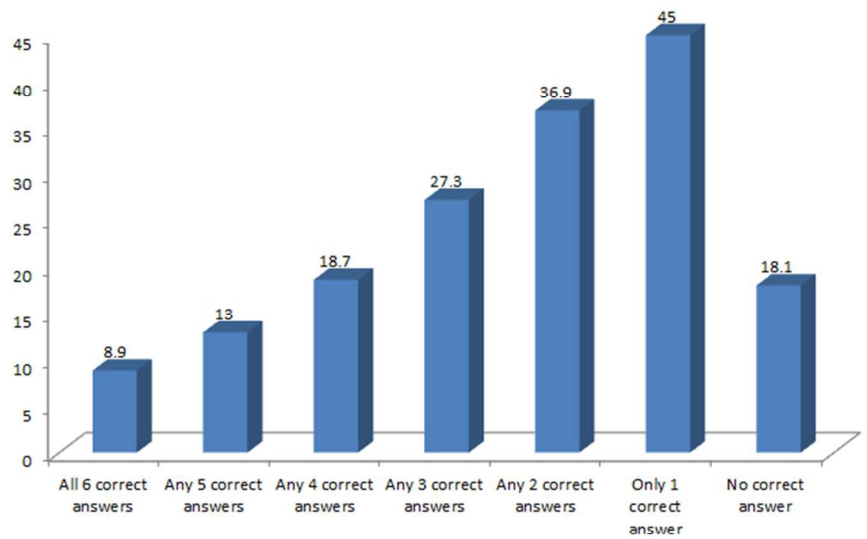

Figure2 A Percentage of correctly answered questions on knowledge about TB symptoms

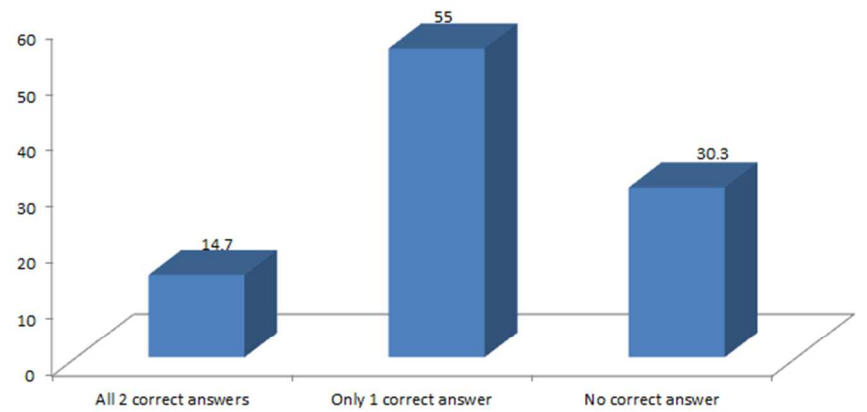

Figure2 B Percentage of correctly answered questions on knowledge about TB transmission

58x75mm (300 x 300 DPI)

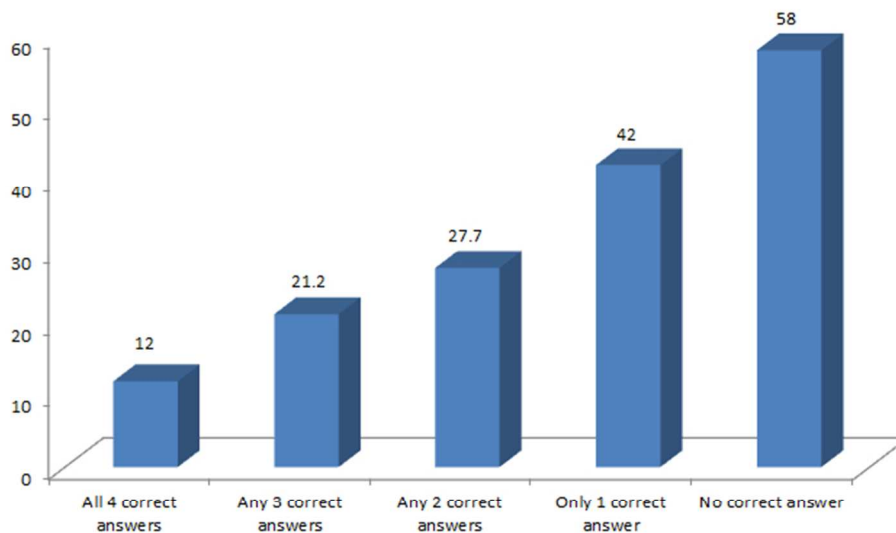

Figure3A Percentage of correctly answered questions on knowledge about TB free policy

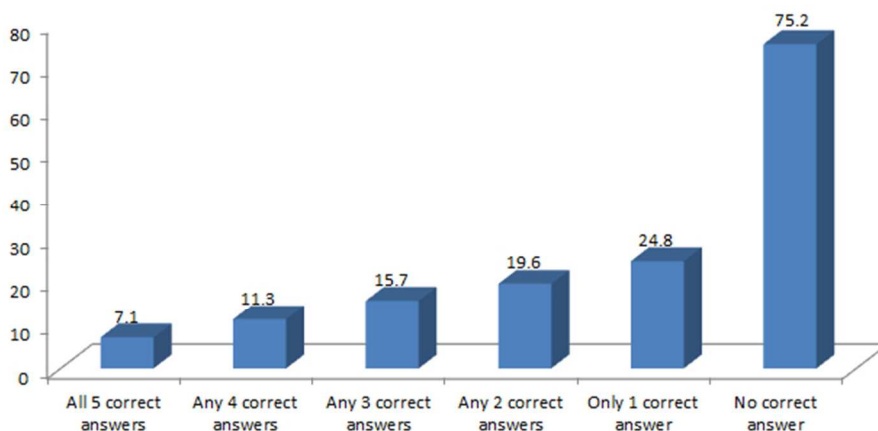

Figure3B Percentage of correctly answered questions on knowledge about DOTS

58x67mm (300 x 300 DPI)

1  
2  
3  
4  
5  
6  
7  
8  
9  
10  
11  
12  
13  
14  
15  
16  
17  
18  
19  
20  
21  
22  
23  
24  
25  
26  
27  
28  
29  
30  
31  
32  
33  
34  
35  
36  
37  
38  
39  
40  
41  
42  
43  
44  
45  
46  
47  
48  
49  
50  
51  
52  
53  
54  
55  
56  
57  
58  
59  
60

1  
2  
3  
4  
5  
6  
7  
8  
9  
10  
11  
12  
13  
14  
15  
16  
17  
18  
19  
20  
21  
22  
23  
24  
25  
26  
27  
28  
29  
30  
31  
32  
33  
34  
35  
36  
37  
38  
39  
40  
41  
42  
43  
44  
45  
46  
47  
48  
49  
50  
51  
52  
53  
54  
55  
56  
57  
58  
59  
60

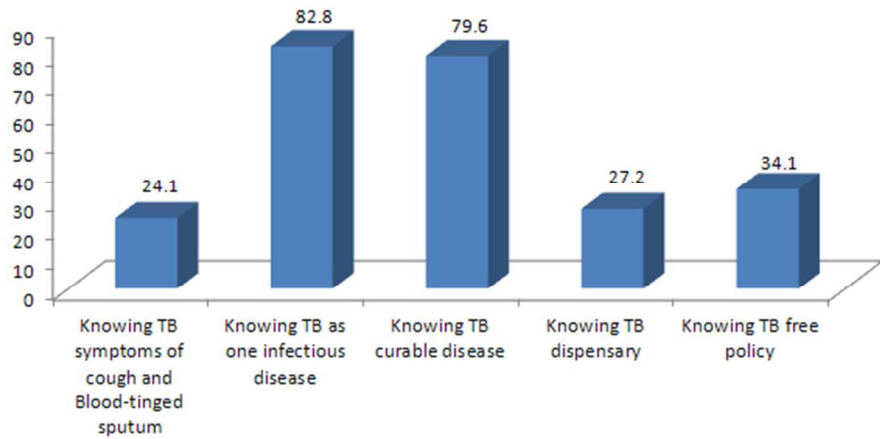

Figure 4A Percentage of correctly answered each question on TB core knowledge

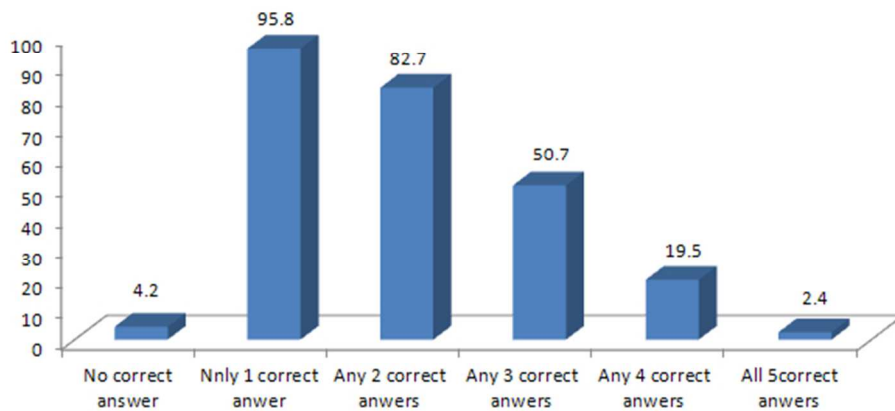

Figure 4B Percentage of correctly answered questions on TB core knowledge

54x61mm (300 x 300 DPI)

1  
2  
3  
4  
5  
6  
7  
8  
9  
10  
11  
12  
13  
14  
15  
16  
17  
18  
19  
20  
21  
22  
23  
24  
25  
26  
27  
28  
29  
30  
31  
32  
33  
34  
35  
36  
37  
38  
39  
40  
41  
42  
43  
44  
45  
46  
47  
48  
49  
50  
51  
52  
53  
54  
55  
56  
57  
58  
59  
60

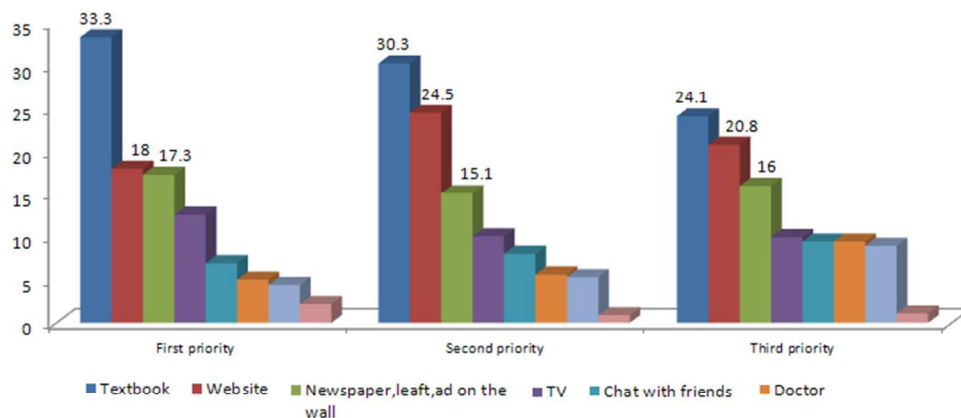

Figure 5 Percentage of students ranked the approach to get TB knowledge

60x30mm (300 x 300 DPI)

er review only



**A survey of TB knowledge among medical students in Southwest China: Is the information reaching the target?**

|                                 |                                                                                                                                                                                                                                                                                                                                                                                                                                                                                                                                               |
|---------------------------------|-----------------------------------------------------------------------------------------------------------------------------------------------------------------------------------------------------------------------------------------------------------------------------------------------------------------------------------------------------------------------------------------------------------------------------------------------------------------------------------------------------------------------------------------------|
| Journal:                        | <i>BMJ Open</i>                                                                                                                                                                                                                                                                                                                                                                                                                                                                                                                               |
| Manuscript ID:                  | bmjopen-2013-003454.R1                                                                                                                                                                                                                                                                                                                                                                                                                                                                                                                        |
| Article Type:                   | Research                                                                                                                                                                                                                                                                                                                                                                                                                                                                                                                                      |
| Date Submitted by the Author:   | 01-Aug-2013                                                                                                                                                                                                                                                                                                                                                                                                                                                                                                                                   |
| Complete List of Authors:       | Zhao, Ying; Chengdu University of Traditional Chinese Medicine, School of Nursing<br>Ehiri, John; University of Arizona, Mel & Enid Zuckerman College of Public Health, Division of Health Promotion Sciences,<br>Li, Daikun; University-Town Hospital of Chongqing University of Medical Sciences, Department of Laboratory Medicine<br>Luo, Xinglun; Center of Disease Control in Shapingba District, Department of TB control<br>Li, Ying; Third Military Medical University, Department of Social Medicine and Health Service Management, |
| <b>Primary Subject Heading</b>: | Health services research                                                                                                                                                                                                                                                                                                                                                                                                                                                                                                                      |
| Secondary Subject Heading:      | Infectious diseases, Public health                                                                                                                                                                                                                                                                                                                                                                                                                                                                                                            |
| Keywords:                       | INFECTIOUS DISEASES, Public health < INFECTIOUS DISEASES, Tuberculosis < INFECTIOUS DISEASES                                                                                                                                                                                                                                                                                                                                                                                                                                                  |
|                                 |                                                                                                                                                                                                                                                                                                                                                                                                                                                                                                                                               |

SCHOLARONE™  
Manuscripts

only



1  
2  
3  
4 **A survey of TB knowledge among medical students in Southwest China: Is**  
5  
6 **the information reaching the target?**  
7  
8  
9

10 Ying Zhao<sup>1a</sup>

11 John Ehiri<sup>2a</sup>

12 Daikun Li<sup>3</sup>

13 Xinglun Luo<sup>4</sup>

14 Ying Li<sup>5§</sup>  
15  
16  
17  
18  
19  
20  
21  
22  
23  
24  
25  
26  
27

28 **§ Correspondence to:** Ying Li, Department of Social Medicine and Health Service  
29 Management, Third Military Medical University, Chongqing 400038, China.  
30 (E-mail: [lilyliying2012@163.com](mailto:lilyliying2012@163.com); [yingli@email.arizona.edu](mailto:yingli@email.arizona.edu))  
31  
32  
33

34 <sup>a</sup>Ying Zhao and John Ehiri contributed equally to this work.  
35  
36  
37  
38  
39  
40  
41  
42  
43  
44  
45  
46  
47  
48  
49  
50  
51  
52  
53  
54  
55  
56  
57  
58  
59  
60

## Abstract

**Objectives:** TB control in schools is a concern in low- and middle-income countries with high TB burdens. TB knowledge is recognized as important for TB control in China, which has one of the highest TB prevalence in the world. Accordingly, National TB Control Guideline in China emphasized TB health education in schools as one of the core strategies for improving TB knowledge among the population. It was important to assess the level of TB knowledge in schools following five-year implementation of the guideline, in order to determine if the information was reaching the targets.

**Design:** A cross-sectional study.

**Methods and study setting:** This survey assessed TB knowledge and access to TB health information by questionnaire survey with 1,486 undergraduates from two medical universities in southwest China.

**Results:** Overall, the students had inadequate TB knowledge. Only 24.1%, 27.2%, and 34.1% of the students had knowledge of TB symptoms of cough/blood-tinged sputum, their local TB dispensaries, and free TB treatment policy, respectively. Very few (14.5%) had heard about the Directly Observed Therapy Short Course (DOTs), and only about half (54%) had ever accessed TB health education information. Exposure to health education messages was significantly associated with increased knowledge of the five core TB knowledge as follows: classic TB symptoms of cough/blood-tinged sputum (OR[95%CI]: 0.5[0.4, 0.7]), TB modes of transmission (OR[95%CI]: 0.4[0.3, 0.5]), curability of TB (OR[95%CI]: 0.6[0.5, 0.7]), location and services provided by TB local dispensaries (OR[95%CI]: 0.6[0.5, 0.8]), and the national free TB treatment policy (OR[95%CI]: 0.7[0.5, 0.8]).

1  
2  
3  
4 **Conclusions:** The findings pose the question of whether it is time for a rethink of the current  
5  
6 national and global approach to TB health education/promotion which favors promotion of  
7  
8 awareness on World TB Days rather than regular community sensitization efforts.  
9  
10

11  
12  
13 **Key words:** *Tuberculosis knowledge; undergraduate students; TB health promotion; China;*  
14  
15  
16  
17  
18  
19  
20  
21  
22  
23  
24  
25  
26  
27  
28  
29  
30  
31  
32  
33  
34  
35  
36  
37  
38  
39  
40  
41  
42  
43  
44  
45  
46  
47  
48  
49  
50  
51  
52  
53  
54  
55  
56  
57  
58  
59  
60

## ARTICLE SUMMARY

### Article focus:

- To describe knowledge of TB among undergraduate medical students.
- To explore factors associated with TB knowledge among undergraduate medical students.
- To attract attention to reform of school-based TB health education and promotion

### Key messages

- Overall, undergraduate medical students had inadequate TB knowledge.
- Undergraduate students had limited access to TB health education/promotion.
- A rethink of current national and global approaches to TB health education/promotion is urgently needed in the light of the current global burden of TB.

### Strengths and limitations of this study

- The main strength of the manuscript is the establishment of a baseline level of TB knowledge among undergraduate medical students. This is the first study to assess school-based TB health education/promotion in the study setting.
- The main limitation is that the study used a cross-sectional design, which did not assess TB knowledge changes before and after school TB health education/promotion.

## INTRODUCTION

The 16<sup>th</sup> Global Report on Tuberculosis (TB) published by WHO in 2012 showed that the Millennium Development Goal target for halting and reversing the TB epidemic by 2015 had already been achieved, with mortality and incidence rates falling in 22 high-burden countries. Nevertheless, the global burden of TB remains untenable,<sup>1</sup> in high-burden countries such as China. Globally, TB remains the second leading cause of death from infectious diseases (after HIV/AIDS).<sup>1</sup> Globally over the past five years, there has been a marked increase in the number of TB patients diagnosed with multi-drug resistant TB (MDR-TB).<sup>1</sup> China has the world's second largest tuberculosis epidemic and has contributed significantly to this MDR-TB increase. In recent years, the country has undertaken measures to control TB, and in order to evaluate the progress of TB control in the past decade, the country launched the 5th National Sampling Survey of TB Epidemiology in 2010.<sup>2</sup> Results of the survey showed an estimated 8.28 million cases of pulmonary TB (PTB) in the country from 2001 to 2010.<sup>2</sup> In spite of concerted international and national efforts to address TB in the country, annual prevalence (per 100,000 people) declined only minimally from 466 in 2000 to 459 in 2010.<sup>2</sup> Similarly, incidence of MDR-TB among PTB cases has remained unchanged in the past decade, and resistance to first-line drugs among newly diagnosed TB patients rose from 34.2 % in 2007/2008<sup>3</sup> to 36.9% in 2010.<sup>2</sup>

Owing to lack of TB knowledge, less than half of patients with TB symptoms seek healthcare timely.<sup>2</sup> Available evidence shows that only 59% TB patients comply with treatment, and among the public, only 57% have proper TB knowledge.<sup>2</sup> Limited knowledge about signs and

1  
2  
3  
4 symptoms of TB often results in delays in TB diagnosis and treatment<sup>4</sup>, which in return,  
5  
6 increases not only the risk of TB transmission, but also the development of MDR-TB.  
7  
8 China's MDR-TB prevalence rate of 6.8% is the highest in the world.<sup>2</sup>  
9

10  
11  
12  
13  
14 TB control among undergraduate students is recognized as a concern in low- and  
15  
16 middle-income countries with high TB burdens. Undergraduate students usually live in  
17  
18 relative overcrowding conditions that are conducive to TB outbreaks.<sup>5</sup> TB outbreaks among  
19  
20 students have been reported even in such low-burden countries as the UK, Italy, Ireland, and  
21  
22 the USA.<sup>6-10</sup> Chinese undergraduate students are recognized as a particularly vulnerable  
23  
24 population for TB. The TB prevalence (per 100,000) among Chinese students has been  
25  
26 reported to be as high as 1,520, which is significantly higher than the prevalence (459) for the  
27  
28 general population.<sup>11</sup> Chongqing, Guizhou, and Shanxi provinces were the three provinces  
29  
30 with the highest TB burden among undergraduate students between 2005 and 2008.<sup>12</sup> In  
31  
32 addition, several TB outbreaks among undergraduate students were recently reported in  
33  
34 Chongqing, Liangning, Zhejiang, Shangdong, and Guizhou, with the incidence rates ranging  
35  
36 from 620 to 31,370 per 100,000.<sup>11-17</sup>  
37  
38  
39  
40  
41  
42  
43  
44  
45

46 Medical students in university can expose to TB infection during clinic rotations.<sup>18</sup> Thus,  
47  
48 adequate knowledge of TB epidemiology and control is critically important for this population.  
49  
50 Knowledge of TB among medical undergraduates in university is also important since they  
51  
52 represent potential future physicians or leaders in the fight against TB.<sup>19</sup> In 1998, WHO  
53  
54 released a document in 1997 following a workshop on Tuberculosis Control and Medical  
55  
56  
57  
58  
59  
60

1  
2  
3  
4 Schools held in Rome, Italy, which stressed the importance of graduating medical students  
5  
6 with proper knowledge and skills related to effective TB control.<sup>20</sup> WHO later released a  
7  
8 manual that aims to inform medical students and medical practitioners about best practices in  
9  
10 managing TB patients.<sup>21</sup> Several studies have documented inadequate TB knowledge and  
11  
12 poor compliance with TB treatment guidelines among practicing physicians.<sup>22-24</sup> In countries  
13  
14 where TB (including MDR-TB) presents significant challenges to public health, equipping  
15  
16 emerging physicians with in-depth TB knowledge is of critical importance in the overall  
17  
18 efforts to reduce the burden of the disease. In China, school TB health promotion was  
19  
20 emphasized in the 2008 National Guideline for TB Control.<sup>25</sup> It was important to assess the  
21  
22 level of TB knowledge in schools following five-year implementation of the guideline. This  
23  
24 survey assessed TB knowledge and access to TB health information among 1,486 pre-clinical  
25  
26 undergraduate students from two medical universities in southwest China which has one of  
27  
28 the highest TB burdens of in the country. It was hoped that the findings could help to identify  
29  
30 whether the information was reaching the targets, and thus engender efforts to strengthen TB  
31  
32 school education in the region and similar locales in low and middle income countries with  
33  
34 high TB burden.  
35  
36  
37  
38  
39  
40  
41  
42  
43  
44  
45

## 46 **METHODS**

### 47 **Study setting**

48  
49 The study setting, Southwest China, includes Chongqing Municipality, the provinces of  
50  
51 Sichuan, Yunnan, Guizhou, and Tibet Autonomous Region (Figure 1) where prevalence rates  
52  
53 (cases per 100,000) of active TB (695), smear positive TB (105), and culture positive TB  
54  
55  
56  
57  
58  
59  
60

1  
2  
3  
4 (198) are much higher than the national prevalence rates of 459, 66, and 119, respectively.<sup>2</sup>  
5

6 Southwest China has a population of more than 19 million which represent more than 10% of  
7  
8 China's population of 1.3 billion people.  
9

## 10 11 12 13 **Participants**

14  
15  
16 There were 10 medical universities in Southwest China. These universities offer 5-year  
17  
18 majors in clinical medicine, public health, pharmacy, medical laboratory, Chinese medicine,  
19  
20 and nursing. We randomly selected two of the 10 universities and restricted our sample frame  
21  
22 to pre-clinical students (students who have not received clinic curriculum) in their first to  
23  
24 third years of training. We excluded fourth- and fifth-year students since they might have  
25  
26 obtained TB knowledge from their clinical training as part of their clinical curriculum rather  
27  
28 than from government school TB health education. The survey was conducted between  
29  
30 November 2011 and May 2012 and focused on the assessment of TB knowledge among the  
31  
32 respondents. The sample frame consisted of 20,000 eligible students. To obtain a power of  
33  
34 80% and a confidence level of 95%, we calculated the study sample to be 1536.<sup>26</sup> During  
35  
36 recruitment, potential participants were approached and provided with detailed explanation of  
37  
38 the study and its objectives. They were then asked if they would be interested in volunteering  
39  
40 to participate. Those who expressed interest were asked to read the informed consent form,  
41  
42 and were assured of confidentiality. They were then asked to sign the informed consent form  
43  
44 as a conformation of their voluntary participation in the study. Approval for the study was  
45  
46 obtained from the Institutional Review Boards of the College of Preventive Medicine, Third  
47  
48 Military Medical University, Chongqing, China (October, 20, 2011) and the School of  
49  
50  
51  
52  
53  
54  
55  
56  
57  
58  
59  
60



1  
2  
3  
4 Nursing, Chengdu University of Traditional Chinese Medicine, Chengdu, Sichuan Province,  
5  
6 China (28 April, 2012).  
7  
8  
9

### 10 11 **Questionnaire**

12  
13 The survey was cross-sectional in design. Following participant enrollment in the study, data  
14  
15 were collected by means of a self-administered questionnaire that assessed participants'  
16  
17 knowledge about TB signs/symptoms, transmission, management, and control. Data were  
18  
19 elicited on the following variables: socio-demographic profile (age, sex), degree major  
20  
21 (clinical and non-clinical), year in the medical program, TB knowledge (symptoms, mode of  
22  
23 transmission, treatment, knowledge of TB control facilities in the study setting, local TB  
24  
25 control policies and program), and core knowledge of TB, namely, five core TB knowledge  
26  
27 areas which include: (i) classic TB symptoms of cough/blood-tinged sputum, (ii) TB modes  
28  
29 of transmission, (iii) curability of TB, (iv) location and services provided by TB local  
30  
31 dispensaries, and (v) the national free TB treatment policy.  
32  
33  
34  
35  
36  
37  
38  
39  
40

### 41 **Data analysis**

42  
43 Epi-data 6.0 was used for data entry. Data analyses were conducted using the Statistical  
44  
45 Package for Social Sciences version 18.0. To assess TB knowledge among the participants,  
46  
47 we calculated the percentage of people who provided correct responses to questions about the  
48  
49 6 symptoms of TB, 3 ways of transmitting TB, 5 items related to TB treatment, and 5 core  
50  
51 knowledge of TB. We used chi-square statistics ( $\chi^2$ ) to assess participants' responses by  
52  
53 gender, year in medical school, and degree major. A binary logistic regression model which  
54  
55  
56  
57  
58  
59  
60

1  
2  
3 included variables with statistical significance on the  $\chi^2$  test, were used to examine factors  
4  
5 associated with core knowledge of TB among the respondents. We used a two-tailed  
6  
7 probability level of  $<0.05$  as the level of statistical significance.  
8  
9

## 10 11 12 13 **RESULTS**

### 14 15 16 17 18 **Demographic characteristics of participants**

19  
20 A total of 1,486 undergraduate medical students participated in the survey. Of these, 617 were  
21  
22 in their first year medical training, 399 in the second year, and 470 in the third year. A  
23  
24 majority of the respondents (74.2%; n=1102) were male, and 68.4% students were majoring  
25  
26 in clinical medicine. Only 54% of the students indicated having access to some kind of TB  
27  
28 health information (Table 1).  
29  
30  
31  
32

### 33 34 35 36 **Knowledge of TB symptoms**

37  
38 The respondents' knowledge of symptoms is shown in Table 2. About 18% (n=261) had no  
39  
40 knowledge of any TB symptoms, and less than 10% (n=132) were able to identify all TB  
41  
42 symptoms (Figure 2 A). As for overall knowledge of TB symptoms, 10.8% (119) male and  
43  
44 female 3.4% (13) year had knowledge of all of these classic symptoms ( $p \leq 0.05$ ), 13.6% (84),  
45  
46 4.3 % (17), 6.6% (31) students of third-year, second year and first-year had knowledge of all  
47  
48 of these classic symptoms ( $p \leq 0.05$ ). There were no statistically significant differences in  
49  
50 knowledge of TB symptoms between students in clinical and non-clinical degree majors  
51  
52  
53  
54  
55  
56  
57  
58  
59  
60 (  $p > 0.05$ ) (Table 2).

### Knowledge about TB transmission

Only 27.9% (n=414) of the respondents were aware that TB could be transmitted through exposure to droplet nuclei from the cough of an infected person (Table 2), and only 14.7% (n=218) knew the two main routes of TB transmission (Figure 2B). Overall, more females (88%; n=338) and third-year students (86.1%; n=531) knew the transmission routes of TB ( $p<0.05$ ).

### Knowledge about TB treatment and policies

Although 80% of the students knew that TB was curable, only 30% (n=446) knew the duration of TB treatment. Only 27.2% (n=404) knew TB control facilities (TB dispensaries); 34% and 14.5% had heard of the national free TB treatment policy and DOTS, respectively (Table 2). A greater proportion of female than male respondents had better knowledge about the duration of TB treatment, TB control facilities, free TB treatment policy, and DOTS ( $P\leq 0.05$ ). Overall, third-year students had better knowledge of TB treatment except for knowledge on TB as a curable disease and free treatment policy. There were no significant differences between students in clinical and non-clinical majors (Table 2). Only 12% (n=178) of the respondents knew all the 4 items included in the free TB treatment policy (registration, sputum test, chest X-rays, and anti-TB drugs) (Figure 3A). Less than 10% (n=106) of the students were familiar with all 5 items of DOTS (Figure 3B).

### Core knowledge of TB

1  
2  
3  
4 With regard to core knowledge of TB, less than half students had knowledge of TB symptoms  
5  
6 of cough/blood-tinged sputum, their local TB dispensaries, and the national free TB treatment  
7  
8 policy (Figure 4A). Only 2.4% were familiar with all five core TB knowledge areas (Figure  
9  
10 4B). Multiple logistic regression analysis indicated that access to health education was  
11  
12 associated with the five core TB knowledge: (OR [95%CI]: 0.5[0.4, 0.7]) for classic TB  
13  
14 symptoms of cough/blood-tinged sputum, (OR [95%CI]: 0.4[0.3, 0.5]) for means of TB  
15  
16 transmission, (OR [95%CI]: 0.6[0.5, 0.7]) for curability of TB, (OR [95%CI]: 0.6[0.5, 0.8])  
17  
18 for TB dispensaries, and (OR [95%CI]: 0.7[0.5, 0.8]) for the national free TB treatment  
19  
20 policy. Males had poor knowledge related to transmission of TB, TB dispensaries and free  
21  
22 TB treatment policy (OR [95%CI]: 1.8[1.3, 2.7], 1.7[1.3, 2.4], 1.9[1.5, 2.4]), respectively.  
23  
24  
25  
26  
27  
28  
29 Third year students had better knowledge of TB compared with students in the first and  
30  
31 second years (Table 3).  
32

### 33 34 **Sources of TB Knowledge**

35  
36 With regard to how the respondents gained awareness and understanding of TB, survey  
37  
38 results indicated that the most frequent source of information was textbooks, the second was  
39  
40 the Internet, and the third was the media (newspaper and billboards) (Figure 5).  
41  
42  
43  
44  
45

## 46 47 **DISCUSSION**

48  
49 TB is still one of the most important global public health threats. If global control of the  
50  
51 disease does not improve, the annual global incidence is expected to increase from the current  
52  
53 21% to 61% by 2020.<sup>27</sup> Early detection and adequate treatment are critical control measures.  
54  
55

56  
57 In spite of the fact that China carries one of the highest TB burdens in the world, lack of  
58  
59  
60

1  
2  
3  
4 knowledge about the disease remains an abiding problem in the country, and thus, presents a  
5  
6 barrier to control efforts.<sup>2</sup>  
7  
8  
9

10  
11 Medical students are China's future health professionals and clinical leaders. Thus,  
12  
13 understanding their level of awareness about TB is important. Unfortunately, this survey  
14  
15 revealed that these students had generally poor knowledge of TB. Surveys conducted in other  
16  
17 countries have reported inadequate knowledge of TB among medical professions students. In  
18  
19 Turkey for example,<sup>28</sup> a study of 828 fourth-year medical students found that they lacked  
20  
21 skills in interpreting radiology and smears even in their last year of medical school. One  
22  
23 study in Brazil found that although medical students had had good knowledge of biosafety  
24  
25 norms, they engaged in risky behaviors in health care settings where TB patients were  
26  
27 assisted<sup>29</sup> Similarly, a study in the United States reported that, prior to implementation of the  
28  
29 National Tuberculosis Curriculum Consortium (NTCC) in U.S. medical schools, about  
30  
31 one-third of medical students did not know the method for administering tuberculin skin test  
32  
33 or that the BCG vaccine was not a contraindication for TB skin testing.<sup>30</sup>  
34  
35  
36  
37  
38  
39  
40  
41  
42  
43

44 The 2008 National Guideline for TB Control in China emphasizes five items of core  
45  
46 knowledge of TB.<sup>25</sup> In the present study, it is of particular concern that the students scored  
47  
48 very low in the TB core knowledge domain. The average knowledge base for all of the 5 core  
49  
50 knowledge domains was only 2.4%, which was lower than the score (43.45%) reported in a  
51  
52 previous study in China's Hunan province.<sup>31</sup> We also found that only 24.1% knew the classic  
53  
54 symptoms of TB (cough and blood stained sputum), which was similar to the report in  
55  
56  
57  
58  
59  
60

1  
2  
3 Nanjing, China where only 26.3% students were familiar with TB symptoms.<sup>32</sup> This study  
4  
5  
6 observed that less than 30% of the respondents knew the course of TB treatment and were  
7  
8 aware of TB control facilities in Southwest China which was lower than the rate observed in  
9  
10 a previous study (36.66%).<sup>32</sup> We found that only 30% knew the free TB treatment policy in  
11  
12 China, which was similar to that reported in a related study.<sup>33</sup> One-third of our respondents  
13  
14 could not identify a mode of transmission for TB. A survey of final year medical students in  
15  
16 China's Hunan province in 2000 concluded that knowledge and practical competencies  
17  
18 regarding TB among final-year medical students were generally inadequate.<sup>34</sup> Results of our  
19  
20 current study showed that the situation has not improved in the past 13 years.  
21  
22  
23  
24  
25  
26  
27  
28

29 TB education has been widely recognized as an effective way to promote TB knowledge  
30  
31 among students. In 2003, the U.S. National Institutes of Health (NIH) perceived a need to  
32  
33 strengthen the teaching of TB to health-profession students, and funded the National  
34  
35 Tuberculosis Curriculum Consortium (NTCC) to help address this need.<sup>30</sup> Evidence shows  
36  
37 that this has contributed to marked improvement in TB knowledge among students,  
38  
39 nationally.<sup>30, 35-36</sup> Strong recommendations to strengthen TB knowledge of medical and other  
40  
41 health-professions students through education have also been made by other countries.<sup>37</sup>  
42  
43  
44 Although the National Guideline for TB Control in China emphasizes TB health education  
45  
46 and promotion for the public, TB patients, and students, TB health education and promotion  
47  
48 in universities remain sub-optimal.<sup>25</sup> Findings from many studies have shown that  
49  
50 40%-63.7% of students reported "hearing from others" as their primary source of information  
51  
52 about TB.<sup>32,37</sup> This study also found that only 54% students had ever received TB health  
53  
54  
55  
56  
57  
58  
59  
60

1  
2  
3  
4 education. Accessing TB health education was significantly associated with core knowledge  
5  
6 of TB. Given that non-clinical students have less opportunity to learn about TB as part of  
7  
8 their regular curriculum, school TB health education should be seen as a primary source of  
9  
10 information on TB for them.  
11  
12

## 13 14 15 16 **CONCLUSION** 17

18  
19  
20  
21 In countries with high TB burden, it is important that all opportunities to raise population  
22  
23 awareness about the disease are used to the optimum. In line with the WHO settings approach  
24  
25 to health promotion,<sup>20</sup> schools should be seen as important avenues for TB health education  
26  
27 given the multiplier effect of such intervention is likely to have on the students, their families,  
28  
29 communities and others in their social networks.<sup>20</sup> Unfortunately, there is the tendency to  
30  
31 focus promotion of TB awareness on national/global TB Control Days to the neglect of a  
32  
33 plethora of opportunities for ongoing promotion in diverse settings. The overall poor  
34  
35 knowledge of TB among medical demonstrated by this study supports the need to increase  
36  
37 school TB health promotion, especially in the light of recent outbreaks of TB in universities  
38  
39 in Southwest China.<sup>13,17</sup> Given the high burden of TB in southwest China, especially in rural  
40  
41 provinces, TB health promotion in schools should be strengthened on an ongoing basis and in  
42  
43 coordination with local TB control departments and district-level Centers for Disease Control  
44  
45 and Prevention (CDC). There is a need for targeted efforts to educate students about TB since  
46  
47 the students can be a major source of information to rural dwellers, including their own  
48  
49 families and others in their circles of influence.  
50  
51  
52  
53  
54  
55  
56  
57  
58  
59  
60

**Author affiliations**

<sup>1</sup>School of Nursing, Chengdu University of Traditional Chinese Medicine, Chengdu, Sichuan Province, China.

<sup>2</sup> Division of Health Promotion Sciences & The Global Health Institute, Mel & Enid Zuckerman College of Public Health, , University of Arizona, Tucson, AZ, USA.

<sup>3</sup>Department of Laboratory Medicine, University-Town Hospital of Chongqing University of Medical Sciences, No. 55 Daxuecheng Road, Shapingba District, Chongqing, China.

<sup>4</sup>Department of TB control, Center of Disease Control in Shapingba District, Chongqing, PR China.

<sup>5</sup>Department of Social Medicine and Health Service Management, Third Military Medical University, No.30 Gaotanyan Road, Shapingba District, Chongqing, China.

**Contributors** YL designed this survey, JE guided the questionnaire design and data collection, YZ, DL and XL collected data, DL managed data, YZ analyzed data. YZ and YL drafted the manuscript; JE edited the manuscript. All authors interpreted the results, revised the report and approved the final version.

**Funding:** the present study was funded by National Natural Science Foundation of China (Award #: 81001297)

**Competing interests** None.

**Ethics approval** The ethics committees of the two study universities approved the study protocol prior to its implementation.

**Data sharing statement** No additional data are available.



## References

1. World Health Organization, 2012. Global Tuberculosis report.  
[http://apps.who.int/iris/bitstream/10665/75938/1/9789241564502\\_eng.pdf](http://apps.who.int/iris/bitstream/10665/75938/1/9789241564502_eng.pdf)
2. Wang Y. Report of the fifth national sampling survey of TB epidemiology. Beijing: Military Medical Science Press. 2011;1-7.
3. Zhao Y, Xu S, Wang L, et al. National survey of drug-resistant tuberculosis in China. *N Engl J Med* 2012; 366:2161–2170
4. Li Y, Ehiri J, Tang S, et al. Factors associated with patient, and diagnostic delays in Chinese TB patients: a systematic review and meta-analysis. *BMC Med.* 2013;11(1):156.
5. Barbara V. *Epidemiology in Health Care* (3rd Edition). NJ: Prentice Hall;1998
6. The Lodi Tuberculosis Working Group. A school- and community-based outbreak of *Mycobacterium tuberculosis* in northern Italy, 1992-3. *Epidemiol Infect* 1994; 113: 83-93.
7. Ridzon R, Kent JH, Valway S, et al. Outbreak of drug-resistant tuberculosis with second-generation transmission in a high school in California. *J Pediatr* 1997; 131: 863-868.
8. Hoge CW, Fisher L, Donnell HD Jr, et al. Risk factors for transmission of *Mycobacterium tuberculosis* in a primary school outbreak: lack of racial difference in susceptibility to infection. *Am J Epidemiol* 1994; 139: 520-530.
9. Quigley C. Investigation of tuberculosis in an adolescent. The Outbreak Control Team. *Common Dis Rep CDR Rev* 1997; 7: R113-R116.

10. Shannon A, Kelly P, Lucey M, et al. Isoniazid resistant tuberculosis in a school outbreak: the protective effect of BCG. *Eur Respir J* 1991; 4: 778-782.
11. Wang H, Pan JP, Zhang TH, et al. Survey on the knowledge, attitude and behaviors of TB among college students. *Chinese Journal of Public health* 2006; 22( 6): 661-662.
12. Du X, Chen W, Huang F. Analysis on TB of national report of students TB during 2004-2008. *Chinese health education* 2009; 25(11):803-805.
13. Zhou S, Chen M. Epidemiology survey on outbreaks of TB in the universities in Chongqing. *Health Medicine Research and Practice in Higher Institutions* 2005;2(2):7-10.
14. Bi HY, Meng W, Liu DS. Epidemiology survey on outbreaks of TB in universities in Dandong city. *Chinese journal of health laboratory technology* 2005; 15(11):1377
15. Wu M, Luo J, Lu M, et al. Epidemiology survey on outbreak of TB in university in Hangzhou city. *Journal of medical research* 2006; 35(6): 61-63.
16. Lu QQ, Ju YX, Li YY. Survey on outbreak of TB in university. *Chinese journal of school health* 2007; 28(12): 1147.
17. Lan MB, Yu YL, Zhang HW. Epidemiology survey on outbreak of TB in university in Guizhou province. *Chinese modern doctor* 2009; 47(29):102-103.
18. Silva VM, Cunha AJ, Kritski AL. Tuberculin skin test conversion among medical students at a teaching hospital in Rio de Janeiro, Brazil. *Infect Control Hosp Epidemiol* 2002; 23:591-594.
19. Mehta D, Bassi R, Singh M, et al. To study the knowledge about tuberculosis management and national tuberculosis program among medical students and aspiring

- 1  
2  
3  
4 doctors in a high tubercular endemic country. *Ann Trop Med Public Health* 2012; 5:206-8.
- 5  
6  
7 20. WHO. Tuberculosis control and medical schools. Report of a WHO Workshop, Rome,  
8  
9 Italy 29-31 October 1997. [http://whqlibdoc.who.int/hq/1998/WHO\\_TB\\_98.236.pdf](http://whqlibdoc.who.int/hq/1998/WHO_TB_98.236.pdf)
- 10  
11 21. Nadia AK, Donald A E. Tuberculosis. A manual for medical students. World Health  
12  
13 Organization 2005, WHO/CDS/TB/99.272.
- 14  
15  
16 22. Arif K, Ali SA, Amanullah S. Physician compliance with national tuberculosis treatment  
17  
18 guidelines: A university hospital study. *Int J Tuberc Lung Dis* 1997; 2:2225-30.
- 19  
20  
21 23. LoBue PA, Moser K, Catanzaro A. Management of tuberculosis in San Diego County: A  
22  
23 survey of physicians' knowledge, attitudes and practices. *Int J Tuberc Lung Dis* 2001;  
24  
25 5:933-8.
- 26  
27  
28 24. Khan JA, Zahid S, Khan R, et al. Medical interns' knowledge of TB in Pakistan. *Trop*  
29  
30 *Doct* 2005; 35:144-7.
- 31  
32  
33 25. Center for Disease Control in China, 2008. The operational guideline for Tuberculosis  
34  
35 control program in China, 2008. Beijing: Ministry of Health. 101-105.
- 36  
37  
38 26. Braden CR. Infectiousness of a university student with laryngeal and cavitary tuberculosis.  
39  
40 Investigative team. *Clin Infect Dis*. 1995; 21: 565-70.
- 41  
42  
43 27. Dye C, Garnett GP, Sleeman K, et al. Prospects for worldwide tuberculosis control under  
44  
45 the WHODOTS strategy. *Lancet* 1998; 352:1886-91.
- 46  
47  
48 28. Kilicaslan Z, Kiyani E, Erkan F, et al. Evaluation of undergraduate training on  
49  
50 tuberculosis at Istanbul Medical School. *Int J Tuberc Lung Dis* 2003; 7:159-164.
- 51  
52  
53  
54  
55  
56  
57  
58  
59  
60

- 1  
2  
3  
4 29. Teixeira EG, Menzies D, Cunha AJ, et al. Knowledge and practices of medical students to  
5 prevent tuberculosis transmission in Rio de Janeiro, Brazil. *Rev Panam Salud Publica*.  
6  
7 2008; 24(4):265-70.  
8  
9  
10  
11 30. Jackson M, Harrity S, Hoffman H, Catanzaro A. A survey of health-profession students for  
12 knowledge, attitudes, and confidence about tuberculosis, 2005. *BMC Public Health* 2007;  
13  
14 7:219.  
15  
16  
17  
18 31. Feng SD, Yang SQ, Ling HY. Investigation on knowledge, attitude and behavior  
19 regarding tuberculosis in university students in Hengyan City. *Chin J School Doctor* 2011;  
20  
21 25(11):815-817.  
22  
23  
24  
25  
26 32. Zhang Z, Zhang XN, Cao SY, et al. Cognition of tuberculosis related knowledge and  
27 attitude among college students in Nanjing. *Chin J Sch Health* 2012;33 (3): 263-264.  
28  
29  
30  
31 33. Yan HY. Survey on the knowledge, attitude and behaviors related to TB among  
32 undergraduate students in universities. *Chin J Sch Health* 2009; 30(7):639.  
33  
34  
35  
36 34. Bai LQ, Ziao SY, Xie HW, et al. Knowledge and practice regarding tuberculosis among  
37 final-year medical students in Hunan, China. *Zhonghua Jie He He Hu Xi Za Zhi* 2003;  
38  
39 26(8):458-461.  
40  
41  
42  
43 35. Harrity S, Jackson M, Hoffman H, et al. The National Tuberculosis Curriculum  
44 Consortium: a model of multi-disciplinary educational collaboration. *Int J Tuberc Lung*  
45  
46 *Dis.* 2007; 11(3):270-4.  
47  
48  
49  
50  
51 36. Jensen PA. Where should infection control programs for tuberculosis begin? *Int J Tuberc*  
52 *Lung Dis* 2005; 9:825.  
53  
54  
55  
56 37. Fu L, Tian M, Pan R, et al. Investigation on College Student' Knowledge, Confidence and  
57  
58  
59  
60

1  
2  
3  
4  
5  
6  
7  
8  
9  
10  
11  
12  
13  
14  
15  
16  
17  
18  
19  
20  
21  
22  
23  
24  
25  
26  
27  
28  
29  
30  
31  
32  
33  
34  
35  
36  
37  
38  
39  
40  
41  
42  
43  
44  
45  
46  
47  
48  
49  
50  
51  
52  
53  
54  
55  
56  
57  
58  
59  
60

Behavior about Prevention and Treatment for Tuberculosis in Chengdu. *Parasitoses and Infectious Diseases* 2008; 6(4):185-187.

For peer review only

## Tables

**Table1 Demographic characteristics of undergraduates surveyed in medical universities in southwest China (n=1486)**

| Demographic factors           | N                   | %    |      |
|-------------------------------|---------------------|------|------|
| Sex                           | Male                | 1102 | 74.2 |
|                               | Female              | 384  | 25.8 |
| Grade                         | Year 1              | 617  | 41.5 |
|                               | Year 2              | 399  | 26.9 |
|                               | Year 3              | 470  | 31.6 |
| Major                         | Clinic medicine     | 1017 | 68.4 |
|                               | Non-clinic medicine | 469  | 31.6 |
| Access to TB health education | Yes                 | 802  | 54   |
|                               | No                  | 684  | 45   |

**Table 2 Knowledge of TB signs/symptoms, transmission, and treatment among undergraduates in medical universities in Southwest China†**

| Knowledge of TB                                    | Total n(%) | Sex n (%) |            | Grade n (%) |           |            | Major n (%)       |                       |
|----------------------------------------------------|------------|-----------|------------|-------------|-----------|------------|-------------------|-----------------------|
|                                                    |            | Male      | Female     | Year 3      | Year 2    | Year 1     | Clinical medicine | Non-clinical medicine |
| <b>Students had knowledge of TB signs/symptoms</b> |            |           |            |             |           |            |                   |                       |
| Chronic cough                                      | 597(40.2)  | 501(45.5) | 96(25.0)*  | 262(42.5)   | 118(29.6) | 217(46.0)* | 399(39.2)         | 198(42.2)             |
| Haemoptysis                                        | 756(50.9)  | 608(55.2) | 148(38.5)* | 332(53.8)   | 176(44.2) | 248(52.9)* | 509(50.0)         | 247(52.8)             |
| Fever                                              | 371(25.0)  | 298(27.1) | 73(19.0)*  | 204(33.1)   | 73(18.4)  | 94(20.0)*  | 269(26.5)         | 102(21.7)             |
| Night sweats                                       | 328(22.1)  | 265(24.1) | 63(16.4)*  | 209(33.9)   | 54(13.6)  | 65(13.8)*  | 235(23.1)         | 93(19.8)              |
| Weakness                                           | 398(26.8)  | 348(31.6) | 50(13.0)*  | 212(34.4)   | 73(18.3)  | 113(24.0)* | 270(26.5)         | 128(27.3)             |
| Weight loss                                        | 318(21.4)  | 286(26.0) | 32(8.3)*   | 190(30.8)   | 43(10.8)  | 85(18.1)*  | 220(21.7)         | 98(20.9)              |
| All above TB signs/symptoms                        | 132(8.9)   | 119(10.8) | 13(3.4)*   | 84(13.6)    | 17(4.3)   | 31(6.6)*   | 88(8.7)           | 44(9.4)               |
| <b>Students had knowledge of TB transmission</b>   |            |           |            |             |           |            |                   |                       |
| TB is an infectious disease                        | 1231(82.8) | 893(81.0) | 338(88.0)* | 531(86.1)   | 316(79.4) | 384(81.5)* | 854(84.0)         | 377(80.4)             |
| Transmitted by cough                               | 414(27.9)  | 338(30.7) | 76(19.8)*  | 186(30.1)   | 92(23.1)  | 136(29.0)  | 293(28.8)         | 121(25.8)             |
| Transmitted by sneezing & talking loudly           | 841(56.6)  | 607(55.1) | 234(60.9)* | 386(62.6)   | 191(48.0) | 264(56.3)* | 597(58.8)         | 244(52.0)*            |
| <b>Students had knowledge of TB treatment</b>      |            |           |            |             |           |            |                   |                       |
| TB is a treatable disease                          | 1183(79.6) | 891(81.0) | 292(76.0)* | 477(77.3)   | 318(80.1) | 388(82.6)* | 802(79.0)         | 381(81.4)             |
| Duration of treatment                              | 439(29.5)  | 313(28.5) | 126(32.8)* | 207(33.5)   | 109(27.5) | 123(26.2)* | 304(30.0)         | 135(28.8)             |
| Aware of TB dispensary                             | 404(27.2)  | 267(24.4) | 137(35.7)* | 169(27.4)   | 108(27.1) | 127(27.0)  | 270(26.5)         | 134(28.6)             |
| Aware of free treatment policy                     | 506(34.1)  | 345(31.4) | 161(41.9)* | 197(31.9)   | 123(31.1) | 186(39.5)* | 356(35.1)         | 150(32.0)             |
| Aware of DOTS                                      | 215(14.5)  | 142(12.9) | 73(19.0)*  | 110(17.8)   | 55(13.9)  | 50(10.8)*  | 148(14.6)         | 67(14.3)              |

† $\chi^2$  test used to compare between males and females, different grades, and different majors.

\*P < 0.05

**Table 3 Factors associated with the core knowledge of TB among undergraduates in medical university in Southwest China**

| Factors                              | OR (95%CI)                                   |                              |                           |               |                |
|--------------------------------------|----------------------------------------------|------------------------------|---------------------------|---------------|----------------|
|                                      | TB symptoms of cough and blood-tinged sputum | TB as one infectious disease | TB as one curable disease | TB dispensary | TB free policy |
| <b>Gender</b>                        |                                              |                              |                           |               |                |
| Female                               | Reference                                    | Reference                    | Reference                 | Reference     | Reference      |
| Male                                 | 0.1(0.1, 0.2)                                | 1.8(1.3, 2.7)                | 0.8(0.6, 1.1)             | 1.7(1.3, 2.4) | 1.9(1.5, 2.4)  |
| <b>Grade</b>                         |                                              |                              |                           |               |                |
| Year 1                               | Reference                                    | Reference                    | Reference                 | Reference     | Reference      |
| Year 2                               | 1.6(1.5, 1.9)                                | 1.7(1.5, 1.9)                | 1.3(0.9, 1.8)             | 1.1(0.8, 1.5) | 1.6(1.2, 2.0)  |
| Year 3                               | 1.8(1.2,2.6)                                 | 1.2(0.8,1.7)                 | 1.1(0.7, 1.5)             | 1.1(0.8, 1.6) | 1.7(1.2, 2.3)  |
| <b>Major</b>                         |                                              |                              |                           |               |                |
| Clinic medicine                      | Reference                                    | Reference                    | Reference                 | Reference     | Reference      |
| Non-clinic medicine                  | 1.1(0.8, 1.4)                                | 1.7(0.5, 1.9)                | 1.2(0.9, 1.6)             | 1.1(0.8, 1.4) | 0.8(0.6, 1.1)  |
| <b>Access to TB health education</b> |                                              |                              |                           |               |                |
| Yes                                  | Reference                                    | Reference                    | Reference                 | Reference     | Reference      |
| No                                   | 0.5(0.4, 0.7)                                | 0.4(0.3, 0.5)                | 0.6(0.5, 0.7)             | 0.6(0.5, 0.8) | 0.7(0.5, 0.8)  |



1  
2  
3  
4  
5  
6 **Figure legends**  
7

8  
9 **Fig. 1: The Southwestern People's Republic of China.**

10  
11 In this this figure demonstrated Southwest China. The place marked with red color is  
12  
13 Southwest China which includes the municipality of Chongqing, the provinces of Sichuan,  
14  
15 Yunnan and Guizhou, and the Tibet Autonomous Regions.  
16  
17  
18  
19  
20

21 **Fig. 2: Knowledge of TB symptoms and transmission among undergraduate medical**  
22 **students in Southwest China.**  
23

24  
25  
26 Figure 2A presents undergraduate medical students' knowledge of classical symptoms of TB;  
27  
28 Figure 2B presents students' knowledge of means of TB transmission.  
29  
30

31 **Fig. 3: Knowledge of TB free policy and DOTS among undergraduate medical students**  
32 **in Southwest China.**  
33

34  
35  
36 Figure 3A presents undergraduate medical students' knowledge of the free TB treatment  
37  
38 policy in China; Figure 3B presents undergraduate medical students' knowledge of the  
39  
40 contents of the Directly Observed Therapy-Short Course (DOTS) program.  
41  
42

43 **Fig. 4: Knowledge of core TB knowledge among undergraduate medical students in**  
44 **Southwest China.**  
45  
46

47  
48  
49 Figure 4A presents the percentage of undergraduate medical students correctly answered each  
50  
51 question for core TB knowledge; Figure 4B presents percentage of undergraduate medical  
52  
53 students correctly answered none, only one question, any 2, any 3, any 4 and any 5 questions  
54  
55 for core TB knowledge.  
56  
57  
58  
59  
60

1  
2  
3  
4 This figure presents undergraduate medical students' knowledge of core TB symptoms

5  
6 **Fig. 5: Sources of TB knowledge among undergraduate medical students in Southwest**  
7  
8 **China.**

9  
10  
11 This figure presents undergraduate medical students' major sources of information on TB.  
12  
13  
14  
15  
16  
17  
18  
19  
20  
21  
22  
23  
24  
25  
26  
27  
28  
29  
30  
31  
32  
33  
34  
35  
36  
37  
38  
39  
40  
41  
42  
43  
44  
45  
46  
47  
48  
49  
50  
51  
52  
53  
54  
55  
56  
57  
58  
59  
60

For peer review only

1  
2  
3  
4  
5  
6  
7  
8  
9  
10  
11  
12  
13  
14  
15  
16  
17  
18  
19  
20  
21  
22  
23  
24  
25  
26  
27  
28  
29  
30  
31  
32  
33  
34  
35  
36  
37  
38  
39  
40  
41  
42  
43  
44  
45  
46  
47  
48  
49  
50  
51  
52  
53  
54  
55  
56  
57  
58  
59  
60

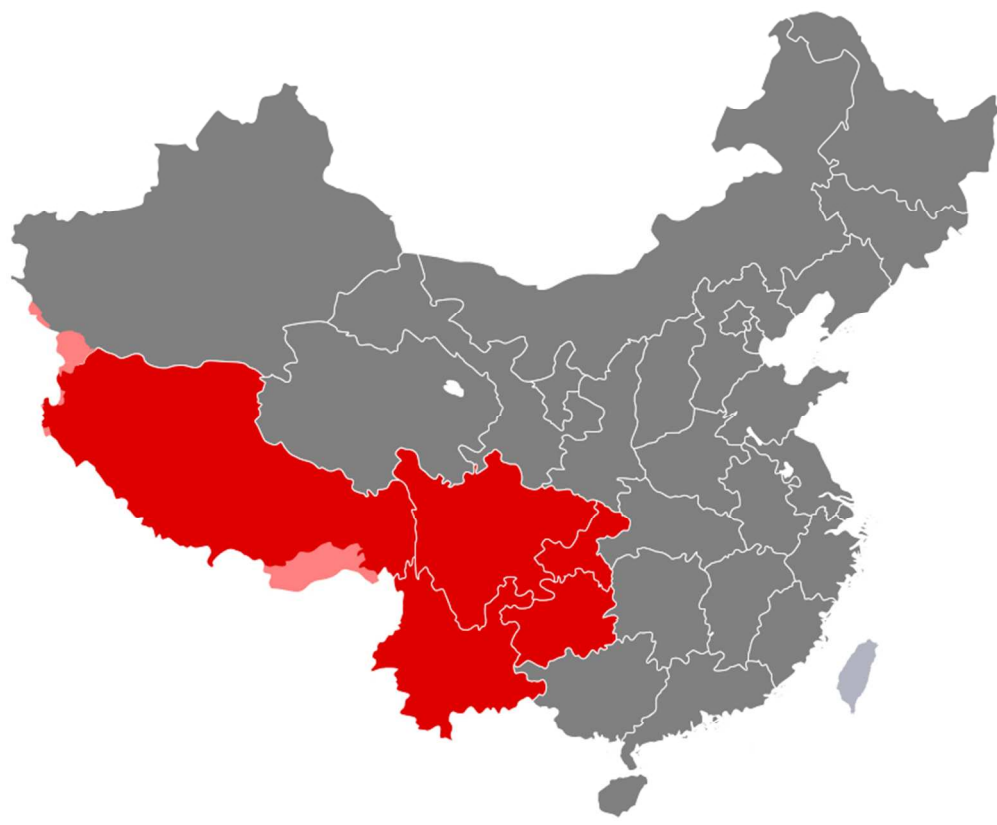

72x59mm (300 x 300 DPI)

ew only

1  
2  
3  
4  
5  
6  
7  
8  
9  
10  
11  
12  
13  
14  
15  
16  
17  
18  
19  
20  
21  
22  
23  
24  
25  
26  
27  
28  
29  
30  
31  
32  
33  
34  
35  
36  
37  
38  
39  
40  
41  
42  
43  
44  
45  
46  
47  
48  
49  
50  
51  
52  
53  
54  
55  
56  
57  
58  
59  
60

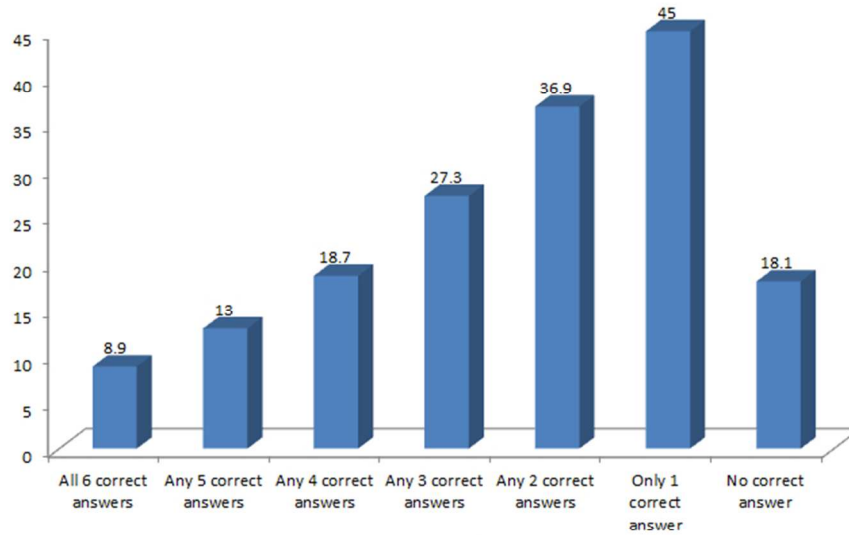

Figure2 A Percentage of correctly answered questions on knowledge about TB symptoms

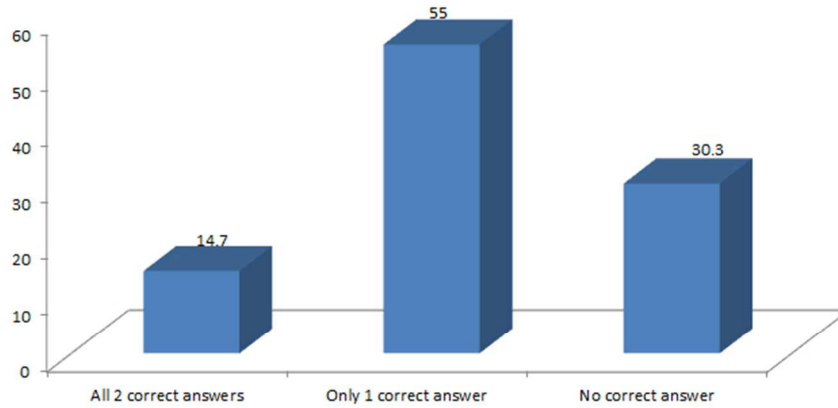

Figure2 B Percentage of correctly answered questions on knowledge about TB transmission

58x75mm (300 x 300 DPI)

1  
2  
3  
4  
5  
6  
7  
8  
9  
10  
11  
12  
13  
14  
15  
16  
17  
18  
19  
20  
21  
22  
23  
24  
25  
26  
27  
28  
29  
30  
31  
32  
33  
34  
35  
36  
37  
38  
39  
40  
41  
42  
43  
44  
45  
46  
47  
48  
49  
50  
51  
52  
53  
54  
55  
56  
57  
58  
59  
60

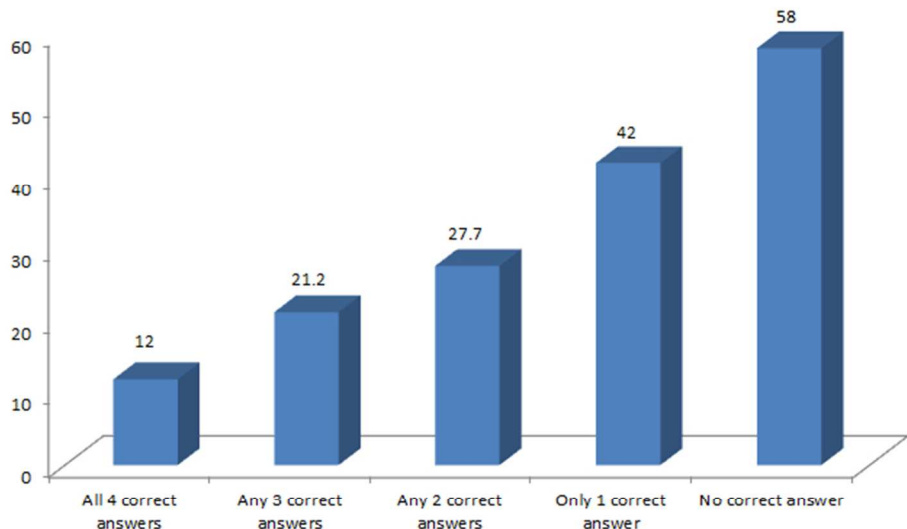

Figure3A Percentage of correctly answered questions on knowledge about TB free policy

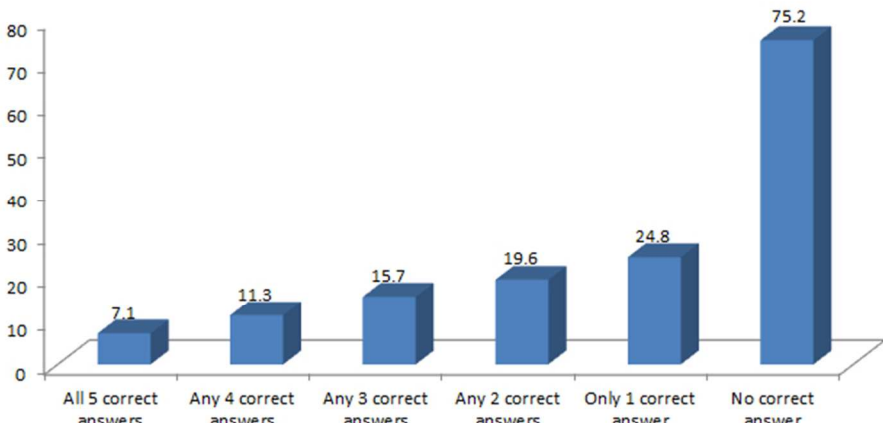

Figure3B Percentage of correctly answered questions on knowledge about DOTS

58x67mm (300 x 300 DPI)

1  
2  
3  
4  
5  
6  
7  
8  
9  
10  
11  
12  
13  
14  
15  
16  
17  
18  
19  
20  
21  
22  
23  
24  
25  
26  
27  
28  
29  
30  
31  
32  
33  
34  
35  
36  
37  
38  
39  
40  
41  
42  
43  
44  
45  
46  
47  
48  
49  
50  
51  
52  
53  
54  
55  
56  
57  
58  
59  
60

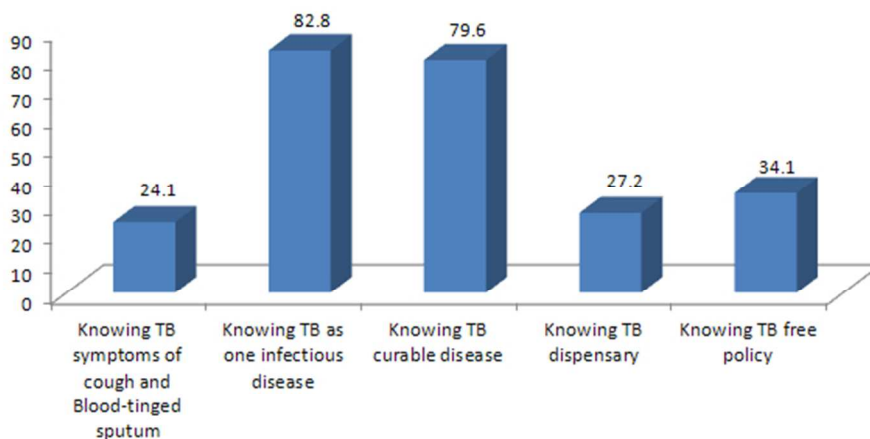

Figure 4A Percentage of correctly answered each question on TB core knowledge

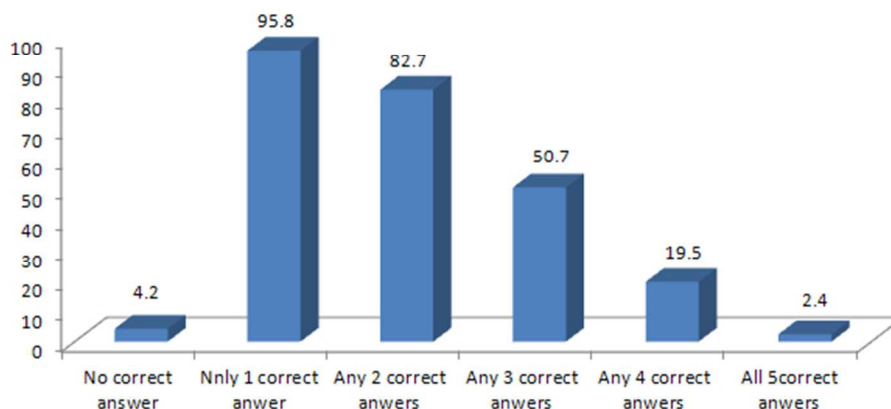

Figure 4B Percentage of correctly answered questions on TB core knowledge

54x61mm (300 x 300 DPI)

1  
2  
3  
4  
5  
6  
7  
8  
9  
10  
11  
12  
13  
14  
15  
16  
17  
18  
19  
20  
21  
22  
23  
24  
25  
26  
27  
28  
29  
30  
31  
32  
33  
34  
35  
36  
37  
38  
39  
40  
41  
42  
43  
44  
45  
46  
47  
48  
49  
50  
51  
52  
53  
54  
55  
56  
57  
58  
59  
60

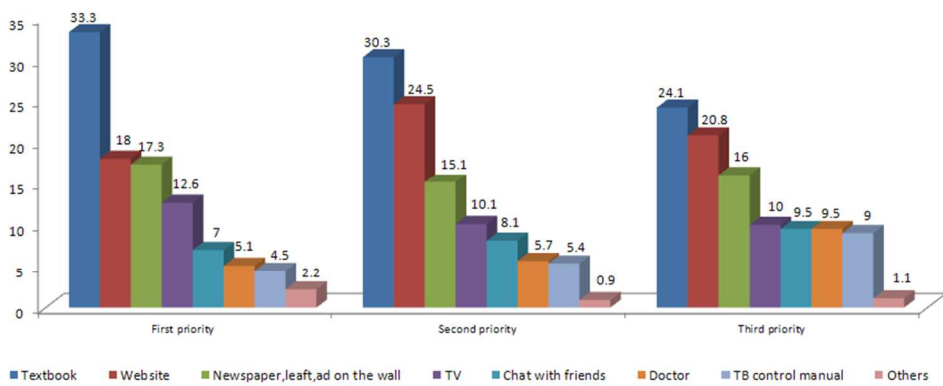

Figure 5 Percentage of students ranked the approach to get TB knowledge

76x35mm (300 x 300 DPI)

er review only

1  
2  
3  
4 **A survey of TB knowledge among medical students in Southwest China: Is**  
5  
6 **the information reaching the target?**  
7  
8  
9

10 Ying Zhao<sup>1a</sup>

11 John Ehiri<sup>2a</sup>

12 Daikun Li<sup>3</sup>

13 Xinglun Luo<sup>4</sup>

14 Ying Li<sup>5§</sup>

15  
16  
17  
18  
19  
20  
21  
22  
23  
24  
25  
26  
27  
28 **§ Correspondence to:** Ying Li, Department of Social Medicine and Health Service  
29 Management, Third Military Medical University, Chongqing 400038, China.  
30  
31 (E-mail: [lilyliying2012@163.com](mailto:lilyliying2012@163.com); [yingli@email.arizona.edu](mailto:yingli@email.arizona.edu))  
32  
33

34 <sup>a</sup>Ying Zhao and John Ehiri contributed equally to this work.  
35  
36  
37  
38  
39  
40  
41  
42  
43  
44  
45  
46  
47  
48  
49  
50  
51  
52  
53  
54  
55  
56  
57  
58  
59  
60



## Abstract

**Objectives:** TB control in schools is a concern in low- and middle-income countries with high TB burdens. TB knowledge is recognized as important for TB control in China, which has one of the highest TB prevalence in the world. Accordingly, ~~the country's 2008~~ National TB Control Guideline in China emphasized TB health education in schools as one of the core strategies for improving TB knowledge among the population. It was important to assess the level of TB knowledge in schools ~~five years~~ following five-year implementation of the guideline, in order to determine if the information was reaching the targets.

**Design:** A cross-sectional study.

**Methods and study setting:** This survey assessed TB knowledge and access to TB health information by questionnaire survey ~~among with~~ 1,486 ~~medical~~ undergraduates from two medical universities in southwest China.

**Results:** Overall, the students had inadequate TB knowledge. Only 24.1%, 27.2%, and 34.1% of the students had knowledge of TB symptoms of cough/blood-tinged sputum, their local TB dispensaries, and free TB treatment policy, respectively. Very few (14.5%) had heard about the Directly Observed Therapy Short Course (DOTs), and only about half (54%) had ever accessed TB health education information. Exposure to health education messages was significantly associated with increased knowledge of the five core TB knowledge as follows:

classic TB symptoms of cough/blood-tinged sputum (~~FOR(95%CI):~~ 0.5(0.4, 0.7]), TB modes of transmission (~~FOR(95%CI):~~ 0.4(0.3, 0.5]), curability of TB (~~FOR(95%CI):~~ 0.6(0.5, 0.7]), location and services provided by TB local dispensaries (~~FOR(95%CI):~~ 0.6(0.5, 0.8]), and the national free TB treatment policy (~~FOR(95%CI):~~ 0.7(0.5, 0.8]).

1  
2  
3  
4 **Conclusions:** The findings pose the question of whether it is time for a rethink of the current  
5  
6 national and global approach to TB health education/promotion which favors promotion of  
7  
8 awareness on World TB Days rather than regular community sensitization efforts.  
9  
10

11  
12  
13  
14 **Key words:** *Tuberculosis knowledge; undergraduate students; TB health promotion; China;*  
15  
16  
17  
18  
19  
20  
21  
22  
23  
24  
25  
26  
27  
28  
29  
30  
31  
32  
33  
34  
35  
36  
37  
38  
39  
40  
41  
42  
43  
44  
45  
46  
47  
48  
49  
50  
51  
52  
53  
54  
55  
56  
57  
58  
59  
60

## ARTICLE SUMMARY

### Article focus:

- To describe knowledge of TB among undergraduate medical students.
- To explore factors associated with TB knowledge among undergraduate medical students.
- To attract attention to reform of school-based TB health education and promotion

### Key messages

- Overall, undergraduate medical students had inadequate TB knowledge.
- Undergraduate students had limited access to TB health education/promotion.
- A rethink of current national and global approaches to TB health education/promotion is urgently needed in the light of the current global burden of TB.

### Strengths and limitations of this study

- The main strength of the manuscript is the establishment of a baseline level of TB knowledge among undergraduate medical students. This is the first study to assess school-based TB health education/promotion in [the study setting area](#).
- The main limitation is that the study [used is a](#) cross-sectional [design](#), which [did cannot](#) assess TB knowledge changes before and after school TB health education/promotion.

## INTRODUCTION

The 16<sup>th</sup> Global Report on Tuberculosis (TB) published by WHO in 2012 showed that the Millennium Development Goal target for halting and reversing the TB epidemic by 2015 had already been achieved, with mortality and incidence rates falling in 22 high-burden countries.

Nevertheless, the global burden of TB remains untenable,<sup>1</sup> in high-burden countries such as China. Globally, TB remains the second leading cause of death from infectious diseases (after

HIV/AIDS).<sup>1</sup> [Globally](#) Over the past five years, there has been a marked increase in the number of TB patients diagnosed with multi-drug resistant TB (MDR-TB).<sup>1</sup> China has the

world's second largest tuberculosis epidemic and has contributed significantly to this

MDR-TB increase. In recent years, the country has undertaken measures to control TB, and in order to evaluate the progress of TB control in the past decade, the country launched the

5th National Sampling Survey of TB Epidemiology in 2010.<sup>2</sup> Results of the survey showed an estimated 8.28 million cases of pulmonary TB (PTB) in the country from 2001 to 2010.<sup>2</sup>

In spite of concerted international and national efforts to address TB in the country, annual prevalence (per 100,000 people) declined only minimally from 466 in 2000 to 459 in 2010.<sup>2</sup>

Similarly, incidence of MDR-TB among PTB cases has remained unchanged in the past decade, and resistance to first-line drugs among newly diagnosed TB patients rose from

34.2 % in 2007/2008<sup>3</sup> to 36.9% in 2010.<sup>2</sup>

Owing to lack of TB knowledge, less than half of patients with TB symptoms seek healthcare timely.<sup>2</sup> Available evidence shows that only 59% TB patients comply with treatment, and

1  
2  
3  
4 among the public, only 57% have proper TB knowledge.<sup>-2</sup> Limited knowledge about signs  
5  
6 and symptoms of TB often results in delays in TB diagnosis and treatment<sup>4</sup>, which in return,  
7  
8 increases not only the risk of TB transmission, but also the development of MDR-TB.  
9  
10  
11 China's MDR-TB prevalence rate of 6.8% is the highest in the world.<sup>-2</sup>  
12

13  
14  
15  
16 TB control among undergraduate students is recognized as a concern in low- and  
17  
18 middle-income countries with high TB burdens. Undergraduate students usually live in  
19  
20 relative overcrowding conditions ~~of relative overcrowding~~ that are conducive to TB  
21  
22 outbreaks.<sup>-4-5</sup> TB outbreaks among students have been reported even in such low-burden  
23  
24 countries as the UK, Italy, Ireland, and the USA.<sup>56-9-10</sup> Chinese undergraduate students are  
25  
26 recognized as a particularly vulnerable population for TB. The TB prevalence (per 100,000)  
27  
28 among Chinese students has been reported to be as high as 1,520, which is significantly  
29  
30 higher than the prevalence rate (459) for the general population.<sup>+011</sup> Chongqing, Guizhou, and  
31  
32 Shanxi provinces were the three provinces with the highest TB burden among undergraduate  
33  
34 students between 2005 and 2008.<sup>+11-12</sup> In addition, several TB outbreaks among undergraduate  
35  
36 students were recently reported in Chongqing, Liangning, Zhejiang, Shangdong, and Guizhou,  
37  
38 with the incidence rates ranging from 620 to 31,370 per 100,000.<sup>+011-1617</sup>  
39  
40  
41  
42  
43  
44  
45  
46  
47

48  
49 University medical Medical students in university can ~~become~~ exposed to TB infection  
50  
51 during clinic rotations.<sup>-1718</sup> Thus, adequate knowledge of ~~the TB~~ epidemiology and control is  
52  
53 critically important for this population ~~group~~. Knowledge of TB among university medical  
54  
55 undergraduates in university is also important since they represent potential future physicians  
56  
57  
58  
59  
60

1  
2  
3  
4 or leaders in the fight against TB.<sup>18-19</sup> In 1998, WHO released a document in 1997 following a  
5  
6 workshop on Tuberculosis Control and Medical Schools held in Rome, Italy, ~~in 1997~~, which  
7  
8 stressed the importance of graduating medical students with proper knowledge and skills  
9  
10 related to effective TB control.<sup>19-20</sup> WHO later released a manual that aims to inform medical  
11  
12 students and medical practitioners about best practices in managing TB patients.<sup>20-21</sup> Several  
13  
14 studies have documented inadequate TB knowledge and poor compliance with TB treatment  
15  
16 guidelines among practicing physicians.<sup>22-23-24</sup> In countries where TB (including MDR-TB)  
17  
18 presents significant challenges to public health, equipping emerging physicians with in-depth  
19  
20 TB knowledge is of critical importance in the overall efforts to reduce the burden of the  
21  
22 disease. In China, school TB health promotion was emphasized in the 2008 National  
23  
24 Guideline for TB Control.<sup>24-25</sup> It was important to assess the level of TB knowledge in  
25  
26 schools ~~five years~~ following five-year implementation of the guideline. This survey assessed  
27  
28 TB knowledge and access to TB health information among 1,486 pre-clinical undergraduate  
29  
30 students from two medical universities in southwest, China which has one of the highest TB  
31  
32 burdens of ~~TB~~ in the country. It was hoped that the findings could help to identify whether  
33  
34 the information was reaching the targets, and thus engender efforts to strengthen TB school  
35  
36 education in the region and similar locales in low and middle income countries with high TB  
37  
38 burden.  
39  
40  
41  
42  
43  
44  
45  
46  
47  
48  
49  
50

## 51 METHODS

### 52 Study setting

53  
54  
55  
56 The study setting, Southwest China, includes Chongqing Municipality, the provinces of  
57  
58  
59  
60

1  
2  
3  
4 Sichuan, Yunnan, Guizhou, and Tibet Autonomous Region (Figure 1) where prevalence rates  
5  
6 (cases per 100,000) of active TB (695), smear positive TB (105), and culture positive TB  
7  
8 (198) are much higher than the national prevalence rates of 459, 66, and 119, respectively.<sup>2</sup>

9  
10  
11 Southwest China has a population of more than 19 million which represent more than 10-  
12  
13 of China's population of 1.3 billion people.  
14

### 15 16 17 18 19 **Participants**

20  
21 There were 10 medical universities in Southwest China. These universities offer 5-year  
22  
23 majors in clinical medicine, public health, pharmacy, medical laboratory, Chinese medicine,  
24  
25 and nursing. We randomly selected two of the 10 universities and restricted our sample frame  
26  
27 to pre-clinical students (students who have not received clinic curriculum) in their first to  
28  
29 third years of training. We excluded fourth- and fifth-year students since they might have ay-  
30  
31 obtained get TB knowledge from their clinical training on TB as part of their clinical  
32  
33 curriculum rather than from government school TB health education. The survey was  
34  
35 conducted between November 2011 and May 2012 and focused on the assessment of TB  
36  
37 knowledge among the respondents. The sample frame consisted of 20,000 eligible students.  
38  
39 To obtain a power of 80% and a confidence level of 95%, we calculated the study sample to  
40  
41 be 1536.<sup>25-26</sup> During recruitment, potential participants were approached and provided with  
42  
43 detailed explanation of the study and its objectives. They were then asked if they would be  
44  
45 interested in volunteering to participate. Those who expressed interest were asked to read the  
46  
47 informed consent form, and were assured of confidentiality. They were then asked to sign the  
48  
49 informed consent form as a conformation of their voluntary participation in the study.-  
50  
51  
52  
53  
54  
55  
56  
57  
58  
59  
60

1  
2  
3  
4 Approval for the study was obtained from the Institutional Review Boards of the College of  
5 Preventive Medicine, Third Military Medical University, Chongqing, China (October, 20,  
6 2011) and the School of Nursing, Chengdu University of Traditional Chinese Medicine,  
7 Chengdu, Sichuan Province, China (28 April, 2012). The ethics committees of the two study-  
8 universities approved the study protocol prior to its implementation.  
9  
10  
11  
12  
13  
14  
15  
16  
17  
18

### 19 **Questionnaire**

20  
21 The survey was cross-sectional in design. Following participant enrollment in the study, data  
22 were collected by means of a self-administered questionnaire that assessed participants'  
23 knowledge about TB signs/symptoms, transmission, management, and control. Data were  
24 elicited on the following variables: socio-demographic profile (age, sex), degree major  
25 (clinical and non-clinical), year in the medical program, TB knowledge (symptoms, mode of  
26 transmission, treatment, knowledge of/about TB control facilities in the study setting, local  
27 TB control policies and program), and core knowledge of TB, namely, five core TB  
28 knowledge areas which include: (i) classic TB symptoms of cough/blood-tinged sputum, (ii)  
29 TB modes of transmission, (iii) curability of TB, (iv) location and services provided by TB  
30 local dispensaries, and (v) the national free TB treatment policy.  
31  
32  
33  
34  
35  
36  
37  
38  
39  
40  
41  
42  
43  
44  
45  
46  
47  
48

### 49 **Data analysis**

50  
51 Epi-data 6.0 was used for data entry, ~~and~~ Data analyses were conducted, using the Statistical  
52 Package for Social Sciences version 18.0. To assess TB knowledge among the participants,  
53 we calculated the percentage of people who provided correct responses to questions about the  
54  
55  
56  
57  
58  
59  
60



1  
2  
3  
4 ~~5 core knowledge of TB,~~ 6 symptoms of TB, ~~2-3~~ ways of transmitting TB, ~~4-5~~ items ~~of the~~  
5  
6 ~~free related to~~ TB treatment, ~~and~~ ~~policy in China,~~ and ~~5 contents of DOTS~~ 5 core knowledge  
7  
8 of TB. We used chi-square statistics ( $\chi^2$ ) to assess participants' responses by gender, year in  
9  
10 medical school, and ~~degree program~~-major. ~~A binary~~ ~~Multiple~~-logistic regression models  
11  
12 ~~which included variables with statistical significance~~ ~~only~~ ~~by the~~  $\chi^2$  test, were used to examine  
13  
14 factors associated with core knowledge of TB among the respondents. We used a two-tailed  
15  
16 probability level of <0.05 as the level of statistical significance.  
17  
18  
19  
20  
21  
22  
23

## 24 RESULTS

### 25 Demographic characteristics of participants

26  
27  
28  
29  
30  
31 A total of 1,486 undergraduate medical students participated in the survey. Of these, ~~617470~~  
32  
33 were in their first year medical training, 399 in the second year, and ~~470617~~ in the third year.  
34  
35

36  
37 A majority of the respondents (74.2%; n=1102) were male, and 68.4% students were  
38  
39 majoring in clinical medicine. Only 54% of the students indicated having access to some kind  
40  
41 of TB health information (Table 1).  
42  
43  
44  
45

### 46 Knowledge of TB symptoms

47  
48  
49 The respondents' knowledge of symptoms is shown in Table 2. ~~As Survey results showed~~  
50  
51 ~~that as many as 91% of the students had heard of TB. In spite of this, a~~ about 18% (n=261)  
52  
53 had no knowledge of any TB symptoms, ~~and~~ less than 10% (n=132) were able to identify all  
54  
55 ~~of the~~ TB symptoms (Figure 2 A). ~~Only 50.9% and 40% could identify the two key TB~~  
56  
57  
58  
59  
60

1  
2  
3  
4 symptoms of, and chronic cough lasting 3 weeks. Only 20% knew other TB symptoms such  
5  
6 as fever, weakness, and weight loss (Table 2). As for overall knowledge of TB symptoms,  
7  
8 10.8% (119) male and female 3.4% (13) year had knowledge of all of these classic  
9  
10 symptoms (p<0.05), 13.6% (84), 4.3% (17), 6.6% (31) students of third-year, second year and  
11  
12 first-year had knowledge of all of these classic symptoms (p<0.05). ~~Third year students had~~  
13  
14 ~~better knowledge of TB symptoms (p<0.05),~~ and there were no statistically significant  
15  
16 differences in knowledge of TB symptoms between students in clinical and non-clinical  
17  
18 degree majors (p>0.05) (Table 2).  
19  
20  
21  
22  
23  
24  
25  
26

### 27 Knowledge about TB transmission

28  
29 Only 27.9% (n=414) of the respondents were aware that TB could be transmitted through  
30  
31 exposure to droplet nuclei from the cough of an infected person; ~~and slightly more than half~~  
32  
33 ~~(56.6%; n=841) knew that sneezing by TB patients could release droplet nuclei that could~~  
34  
35 ~~transmit the disease to others~~ (Table 2), and ~~only~~ 14.7% (n=218) ~~of the students~~ knew the  
36  
37 two main routes of TB transmission (Figure ~~2b~~2B). Overall, more females (88%; n=338) and  
38  
39 third-year students (86.1%; n=531) knew the transmission routes of TB (p<0.05).  
40  
41  
42  
43  
44  
45  
46

### 47 Knowledge about TB treatment and policies

48  
49 Although 80% of the students knew that TB was curable, only 30% (n=446) knew the  
50  
51 duration of TB treatment~~treatment course of TB~~. Only 27.2% (n=404) knew ~~their local~~ TB  
52  
53 control facilities (TB dispensaries); 34% and 14.5% had heard of the national free TB  
54  
55 treatment policy and DOTS, respectively (Table 2). A greater proportion of female than  
56  
57  
58  
59  
60

1  
2  
3  
4 male respondents had better knowledge about the duration of TB treatment ~~the TB treatment~~  
5 ~~course (32.8% vs 28.5%)~~, TB control facilities ~~(35.7% vs 24.4%)~~, free TB treatment policy-  
6 ~~(41.9% vs 31.4%)~~, and DOTS ~~(19.0% vs 12.9%)~~ ( $P \leq 0.05$ ). Overall, third-year students had  
7  
8 better knowledge of TB treatment except for knowledge on TB as a curable disease and free  
9 treatment policy ~~control facilities~~. There were no significant differences between students in  
10  
11 clinical and non-clinical majors (Table 2). Only 12% (n=178) of the respondents knew all  
12  
13 the 4 items included in the free TB treatment policy (registration, sputum test, chest X-rays,  
14  
15 and anti-TB drugs); ~~58% (n=862) did not know any items included in the free policy~~ (Figure  
16  
17 3-A). Less than 10% (n=106) of the students were familiar with all 5 items of DOTS (Figure  
18  
19 3-B).  
20  
21  
22  
23  
24  
25  
26  
27  
28  
29  
30  
31

### 32 Core knowledge of TB

33  
34 With regard to core knowledge of TB, ~~only 24.1% (n=358), 27.2% (n=404), and 34.1%~~  
35 ~~(n=506) of less than half the~~ students had knowledge of TB symptoms of cough/blood-tinged  
36  
37 sputum, their local TB dispensaries, and the national free TB treatment policy, ~~respectively~~  
38  
39 (Figure 4A). Only 2.4% ~~(n=36)~~ were familiar with all five core TB knowledge areas (Figure  
40  
41 4B). Multiple logistic regression analysis indicated that access to health education was  
42  
43 associated with ~~knowledge of the five core TB knowledge areas;~~ (OR [~~95%CI~~]: ~~0.5~~(0.4,  
44  
45 0.7]) for classic TB symptoms of cough/blood-tinged sputum, (OR [~~95%CI~~]: ~~0.4~~(0.3, 0.5])  
46  
47 for TB modes means of TB of transmission, (OR [~~95%CI~~]: ~~0.6~~(0.5, 0.7]) for curability of  
48  
49 TB, (OR [~~95%CI~~]: ~~0.6~~(0.5, 0.8]) for ~~location and services provided by~~ TB ~~local~~  
50  
51 dispensaries, and (OR [~~95%CI~~]: ~~0.7~~(0.5, 0.8]) for the national free TB treatment policy.  
52  
53  
54  
55  
56  
57  
58  
59  
60

1  
2  
3  
4 Males had poor knowledge related to transmission of TB, TB dispensaries and free TB  
5  
6 treatment policy (OR ~~(1.95%CI): 1.8(1.3, 2.7), 1.7(1.3, 2.4), 1.9(1.5, 2.4), 1.1~~  
7  
8 respectively. Third year students had better knowledge of TB compared with students in the  
9  
10 first and second years (Table 3).

### 13 14 Sources of TB Knowledge

15  
16 With regard to how the respondents gained awareness and understanding of TB, survey  
17  
18 results indicated that the most frequent source of information was textbooks, the second was  
19  
20 the Internet, and the third was the media (newspaper and billboards) (Figure 5).  
21  
22  
23  
24  
25

## 26 DISCUSSION

27  
28 TB is still one of the most important global public health threats. If global control of the  
29  
30 disease does not improve, the annual global incidence is expected to increase from the current  
31  
32 21% to 61% by 2020.<sup>26–27</sup> Early detection and adequate treatment are critical control  
33  
34 measures. In spite of the fact that China carries one of the highest TB burdens in the world,  
35  
36 lack of knowledge about the disease remains an abiding problem in the country, and thus,  
37  
38 presents a barrier to control efforts.<sup>2</sup>  
39  
40  
41  
42  
43  
44  
45

46 Medical students are China's future health professionals and clinical leaders. Thus,  
47  
48 understanding their level of awareness about TB is important. Unfortunately, this survey  
49  
50 revealed that these students had generally poor knowledge of TB.

51  
52 ~~Similar surveys conducted in other countries have reported inadequate knowledge of TB and~~  
53  
54 ~~possibly resulted in risky behaviors~~ among medical professional students. In Turkey for  
55  
56  
57  
58  
59  
60

1  
2  
3  
4 example,<sup>27-28</sup> a study of 828 fourth-year medical students found that they lacked skills in  
5  
6 interpreting radiology and smears even in their last year of medical school. One study in  
7  
8 Brazil found that although medical students had had good knowledge of biosafety norms,  
9  
10 they engaged in risky behaviors in health care settings where TB patients were assisted<sup>28-29</sup>

11  
12  
13  
14 Similarly, a study in the United States reported that, prior to implementation of the National  
15  
16 Tuberculosis Curriculum Consortium (NTCC) in U.S. medical schools, about one-third of  
17  
18 medical students did not know the method for administering tuberculin skin test or that the  
19  
20 BCG vaccine was not a contraindication ~~for~~ TB skin testing.<sup>29-30</sup>

21  
22  
23  
24  
25  
26 The 2008 National Guideline for TB Control in China emphasizes five items of core  
27  
28 knowledge of TB.<sup>24-25</sup> In the present study, it is of particular concern that the students scored  
29  
30 very low in the TB core knowledge domain. The average knowledge base for all of the 5 core  
31  
32 knowledge domains was only 2.4%, which was lower than the score (43.45%) reported in a  
33  
34 previous study in China's Hunan province.<sup>30-31</sup> We also found that only 24.1% knew the classic  
35  
36 symptoms of TB (cough and blood stained sputum), which was similar to the report in  
37  
38 Nanjing, China where only 26.3% students were familiar with TB symptoms.<sup>31-32</sup> This study  
39  
40 observed that Less-less than 30% of the respondents knew the course of TB treatment and  
41  
42 were aware of TB control facilities in Southwest China. ~~This which~~ was lower than the rate  
43  
44 observed in a previous study (36.66%).<sup>32</sup> by Zhang et al. (2012). We found that only 30%  
45  
46 knew the free TB treatment policy in China, which ~~was~~ similar to that reported in a related  
47  
48 study.<sup>32-33</sup> One-third of our respondents could not identify a mode of transmission for TB. A  
49  
50 survey of final year medical students in China's Hunan province in 2000 concluded that  
51  
52  
53  
54  
55  
56  
57  
58  
59  
60

1  
2  
3  
4 knowledge and practical competencies regarding TB among final-year medical students were  
5  
6 generally inadequate.<sup>33-34</sup> Results of our current study showed that the situation has not  
7  
8 improved in the past 13 years.  
9

10  
11  
12  
13  
14 TB education has been widely recognized as an effective way to promote TB knowledge  
15  
16 among students. In 2003, the U.S. National Institutes of Health (NIH) perceived a need to  
17  
18 strengthen the teaching of TB to health-profession students, and funded the National  
19  
20 Tuberculosis Curriculum Consortium (NTCC) to help address this need.<sup>29,30</sup> Evidence shows  
21  
22 that this has contributed to marked improvement in TB knowledge among students,  
23  
24 [nationally throughout the country](#) TB education.<sup>29,30, 34,35-35, 36</sup> Strong recommendations to  
25  
26 strengthen TB knowledge of medical and other health-professions students through education  
27  
28 have also been made by other countries.<sup>36, 37</sup> Although the 2008 National Guideline for TB  
29  
30 Control in China emphasizes TB health education and promotion for the public, TB patients,  
31  
32 and students, TB health education and promotion in universities remain sub-optimal.<sup>24, 25</sup>  
33  
34 Findings from many studies have shown that 40%-63.7% of students reported “hearing from  
35  
36 others” as their primary source of information about TB.<sup>31,32,36, 37</sup> This study also found that  
37  
38 only 54% students had ever received TB health education. Accessing TB health education  
39  
40 was significantly associated with core knowledge of TB. Given that non-clinical students  
41  
42 have less opportunity to learn about TB as part of their regular curriculum, school TB health  
43  
44 education should be seen as a primary source of information on TB for them.  
45  
46  
47  
48  
49  
50  
51  
52  
53  
54  
55

## 56 CONCLUSION

57  
58  
59  
60

1  
2  
3  
4  
5  
6 In countries with high TB burden, it is important that all opportunities to raise population  
7 awareness about the disease are used to the optimum. In line with the WHO settings approach  
8  
9 to health promotion,<sup>19,20</sup> schools should be seen as important avenues for TB health education  
10  
11 given the multiplier effect of such intervention is likely to have on the students, their families,  
12  
13 communities and others in their social networks.<sup>19,20</sup> Unfortunately, there is the tendency to  
14  
15 focus promotion of TB awareness on national/global TB Control Days to the neglect of a  
16  
17  
18  
19  
20  
21  
22  
23  
24  
25  
26  
27  
28  
29  
30  
31  
32  
33  
34  
35  
36  
37  
38  
39  
40  
41  
42  
43  
44  
45  
46  
47  
48  
49  
50  
51  
52  
53  
54  
55  
56  
57  
58  
59  
60

knowledge of TB among medical ~~and health professions students~~ demonstrated by this study  
supports the need to increase school TB ~~school~~-health education promotion, especially in the  
light of recent outbreaks of TB in universities in Southwest China.<sup>12,13,16,17</sup> Given the high  
burden of TB in southwest China, especially in rural provinces, TB health ~~education and~~  
promotion in schools should be strengthened on an ongoing basis and in coordination with  
local TB control departments and district-level Centers for Disease Control and Prevention  
(CDC). There is a need for targeted efforts to educate students about TB since the students  
can be a major source of information to rural dwellers, including their own families and  
others in their circles of influence.

#### Author affiliations

<sup>1</sup>School of Nursing, Chengdu University of Traditional Chinese Medicine, Chengdu, Sichuan  
Province, China.

<sup>2</sup> [Division of Health Promotion Sciences & The Global Health Institute](#), Mel & Enid

1  
2  
3  
4 Zuckerman College of Public Health, ~~Division of Health Promotion Sciences~~, University of  
5  
6 Arizona, Tucson, AZ, USA.  
7

8  
9 <sup>3</sup>Department of Laboratory Medicine, University-Town Hospital of Chongqing University of  
10  
11 Medical Sciences, No. 55 Daxuecheng Road, Shapingba District, Chongqing, China.  
12

13  
14 <sup>4</sup>Department of TB control, Center of Disease Control in Shapingba District, Chongqing, PR  
15  
16 China.  
17

18  
19 <sup>5</sup>Department of Social Medicine and Health Service Management, Third Military Medical  
20  
21 University, No.30 Gaotanyan Road, Shapingba District, Chongqing, China.  
22  
23

24 **Contributors** YL designed this survey, JE guided the questionnaire design and data  
25  
26 collection, YZ, DL and XL collected data, DL managed data, YZ analyzed data. YZ and YL  
27  
28 drafted the manuscript; JE edited the manuscript. All authors interpreted the results, revised  
29  
30 the report and approved the final version.  
31  
32

33  
34 **Funding:** the present study was funded by National Natural Science Foundation of China  
35  
36 (Award #: 81001297)  
37  
38

39  
40 **Competing interests** None.  
41  
42

43 **Ethics approval** The ethics committees of the two study universities approved the study  
44  
45 protocol prior to its implementation.  
46  
47

48 **Data sharing statement** No additional data are available.  
49

## 50 **References**

- 51  
52  
53 1. World Health Organization, 2012.Global Tuberculosis report.  
54

55  
56 [http://apps.who.int/iris/bitstream/10665/75938/1/9789241564502\\_eng.pdf](http://apps.who.int/iris/bitstream/10665/75938/1/9789241564502_eng.pdf)  
57  
58



- 1  
2  
3  
4 2. Wang Y. Report of the fifth national sampling survey of TB epidemiology. Beijing:  
5  
6 Military Medical Science Press. 2011;1-7.  
7  
8  
9 3. Zhao Y, Xu S, Wang L, et al. National survey of drug-resistant tuberculosis in China. *N*  
10  
11 *Engl J Med* 2012; 366:2161–2170  
12  
13 3.4. Li Y, Ehiri J, Tang S, et al. Factors associated with patient, and diagnostic delays in  
14  
15 Chinese TB patients: a systematic review and meta-analysis. *BMC Med.* 2013;11(1):156.  
16  
17  
18  
19 4.5. Barbara V. Epidemiology in Health Care (3rd Edition). NJ: Prentice Hall;1998  
20  
21  
22 5.6. The Lodi Tuberculosis Working Group. A school- and community-based outbreak of  
23  
24 *Mycobacterium tuberculosis* in northern Italy, 1992-3. *Epidemiol Infect* 1994; 113:  
25  
26 83-93.  
27  
28  
29 6.7. Ridzon R, Kent JH, Valway S, et al. Outbreak of drug-resistant tuberculosis with  
30  
31 second-generation transmission in a high school in California. *J Pediatr* 1997; 131:  
32  
33 863-868.  
34  
35  
36 7.8. Hoge CW, Fisher L, Donnell HD Jr, et al. Risk factors for transmission of *Mycobacterium*  
37  
38 tuberculosis in a primary school outbreak: lack of racial difference in susceptibility to  
39  
40 infection. *Am J Epidemiol* 1994; 139: 520-530.  
41  
42  
43  
44 8.9. Quigley C. Investigation of tuberculosis in an adolescent. The Outbreak Control Team.  
45  
46 *Common Dis Rep CDR Revl* 1997; 7: R113-R116.  
47  
48  
49 9.10. Shannon A, Kelly P, Lucey M, et al. Isoniazid resistant tuberculosis in a school  
50  
51 outbreak: the protective effect of BCG. *Eur Respir J* 1991; 4: 778-782.  
52  
53  
54 10.11. Wang H, Pan JP, Zhang TH, et al. Survey on the knowledge, attitude and behaviors  
55  
56 of TB among college students. *Chinese Journal of Public health* 2006; 22( 6): 661-662.  
57  
58  
59  
60

- 1  
2  
3  
4 | ~~11~~.12. Du X, Chen W, Huang F. Analysis on TB of national report of students TB during  
5  
6 | 2004-2008. *Chinese health education* 2009; 25(11):803-805.  
7  
8 | ~~12~~.13. Zhou S, Chen M. Epidemiology survey on outbreaks of TB in the universities in  
9  
10 | Chongqing. *Health Medicine Research and Practice in Higher Institutions*  
11  
12 | 2005;2(2):7-10.  
13  
14 | ~~13~~.14. Bi HY, Meng W, Liu DS. Epidemiology survey on outbreaks of TB in universities in  
15  
16 | Dandong city. *Chinese journal of health laboratory technology* 2005; 15(11):1377  
17  
18 | ~~14~~.15. Wu M, Luo J, Lu M, et al. Epidemiology survey on outbreak of TB in university in  
19  
20 | Hangzhou city. *Journal of medical research* 2006; 35(6): 61-63.  
21  
22 | ~~15~~.16. Lu QQ, Ju YX, Li YY. Survey on outbreak of TB in university. *Chinese journal of*  
23  
24 | *school health* 2007; 28(12): 1147.  
25  
26 | ~~16~~.17. Lan MB, Yu YL, Zhang HW. Epidemiology survey on outbreak of TB in university  
27  
28 | in Guizhou province. *Chinese modern doctor* 2009; 47(29):102-103.  
29  
30 | ~~17~~.18. Silva VM, Cunha AJ, Kritski AL. Tuberculin skin test conversion among medical  
31  
32 | students at a teaching hospital in Rio de Janeiro, Brazil. *Infect Control Hosp Epidemiol*  
33  
34 | 2002; 23:591-594.  
35  
36 | ~~18~~.19. Mehta D, Bassi R, Singh M, et al. To study the knowledge about tuberculosis  
37  
38 | management and national tuberculosis program among medical students and aspiring  
39  
40 | doctors in a high tubercular endemic country. *Ann Trop Med Public Health* 2012; 5:206-8.  
41  
42 | ~~19~~.20. WHO. Tuberculosis control and medical schools. Report of a WHO Workshop,  
43  
44 | Rome, Italy 29-31 October 1997.  
45  
46 | [http://whqlibdoc.who.int/hq/1998/WHO\\_TB\\_98.236.pdf](http://whqlibdoc.who.int/hq/1998/WHO_TB_98.236.pdf)  
47  
48  
49  
50  
51  
52  
53  
54  
55  
56  
57  
58  
59  
60

- 1  
2  
3  
4  
5  
6  
7  
8  
9  
10  
11  
12  
13  
14  
15  
16  
17  
18  
19  
20  
21  
22  
23  
24  
25  
26  
27  
28  
29  
30  
31  
32  
33  
34  
35  
36  
37  
38  
39  
40  
41  
42  
43  
44  
45  
46  
47  
48  
49  
50  
51  
52  
53  
54  
55  
56  
57  
58  
59  
60
- ~~20-21.~~ Nadia AK, Donald A E. Tuberculosis. A manual for medical students. World Health Organization 2005, WHO/CDS/TB/99.272.
- ~~21-22.~~ Arif K, Ali SA, Amanullah S. Physician compliance with national tuberculosis treatment guidelines: A university hospital study. *Int J Tuberc Lung Dis* 1997; 2:2225-30.
- ~~22-23.~~ LoBue PA, Moser K, Catanzaro A. Management of tuberculosis in San Diego County: A survey of physicians' knowledge, attitudes and practices. *Int J Tuberc Lung Dis* 2001; 5:933-8.
- ~~23-24.~~ Khan JA, Zahid S, Khan R, et al. Medical interns' knowledge of TB in Pakistan. *Trop Doct* 2005; 35:144-7.
- ~~24-25.~~ Center for Disease Control in China, 2008. The operational guideline for Tuberculosis control program in China, 2008. Beijing: Ministry of Health. 101-105.
- ~~25-26.~~ Braden CR. Infectiousness of a university student with laryngeal and cavitory tuberculosis. Investigative team. *Clin Infect Dis*. 1995; 21: 565-70.
- ~~26-27.~~ Dye C, Garnett GP, Sleeman K, et al. Prospects for worldwide tuberculosis control under the WHODOTS strategy. *Lancet* 1998; 352:1886-91.
- ~~27-28.~~ Kilicaslan Z, Kiyan E, Erkan F, et al. Evaluation of undergraduate training on tuberculosis at Istanbul Medical School. *Int J Tuberc Lung Dis* 2003; 7:159-164.
- ~~28-29.~~ Teixeira EG, Menzies D, Cunha AJ, et al. Knowledge and practices of medical students to prevent tuberculosis transmission in Rio de Janeiro, Brazil. *Rev Panam Salud Publica*. 2008; 24(4):265-70.

- 1  
2  
3  
4  
5  
6  
7  
8  
9  
10  
11  
12  
13  
14  
15  
16  
17  
18  
19  
20  
21  
22  
23  
24  
25  
26  
27  
28  
29  
30  
31  
32  
33  
34  
35  
36  
37  
38  
39  
40  
41  
42  
43  
44  
45  
46  
47  
48  
49  
50  
51  
52  
53  
54  
55  
56  
57  
58  
59  
60
- 29-30. Jackson M, Harrity S, Hoffman H, Catanzaro A. A survey of health-profession students for knowledge, attitudes, and confidence about tuberculosis, 2005. *BMC Public Health* 2007; 7:219.
- 30-31. Feng SD, Yang SQ, Ling HY. Investigation on knowledge, attitude and behavior regarding tuberculosis in university students in Hengyan City. *Chin J School Doctor* 2011; 25(11):815-817.
- 31-32. Zhang Z, Zhang XN, Cao SY, et al. Cognition of tuberculosis related knowledge and attitude among college students in Nanjing. *Chin J Sch Health* 2012;33 (3): 263-264.
- 32-33. Yan HY. Survey on the knowledge, attitude and behaviors related to TB among undergraduate students in universities. *Chin J Sch Health* 2009; 30(7):639.
- 33-34. Bai LQ, Ziao SY, Xie HW, et al. Knowledge and practice regarding tuberculosis among final-year medical students in Hunan, China. *Zhonghua Jie He He Hu Xi Za Zhi* 2003; 26(8):458-461.
- 34-35. Harrity S, Jackson M, Hoffman H, et al. The National Tuberculosis Curriculum Consortium: a model of multi-disciplinary educational collaboration. *Int J Tuberc Lung Dis.* 2007; 11(3):270-4.
- 35-36. Jensen PA. Where should infection control programs for tuberculosis begin? *Int J Tuberc Lung Dis* 2005; 9:825.
- 36-37. Fu L, Tian M, Pan R, et al. Investigation on College Student' Knowledge, Confidence and Behavior about Prevention and Treatment for Tuberculosis in Chengdu. *Parasitoses and Infectious Diseases* 2008; 6(4):185-187.

## Tables

**Table1 Demographic characteristics of undergraduates surveyed in medical universities in southwest China (n=1486)**

| Demographic factors           | N                   | %    |      |
|-------------------------------|---------------------|------|------|
| Sex                           | Male                | 1102 | 74.2 |
|                               | Female              | 384  | 25.8 |
| Grade                         | Year 1              | 617  | 41.5 |
|                               | Year 2              | 399  | 26.9 |
|                               | Year 3              | 470  | 31.6 |
| Major                         | Clinic medicine     | 1017 | 68.4 |
|                               | Non-clinic medicine | 469  | 31.6 |
| Access to TB health education | Yes                 | 802  | 54   |
|                               | No                  | 684  | 45   |

**Table 2 Knowledge of TB signs/symptoms, transmission, and treatment among undergraduates in medical universities in Southwest China†**

| Knowledge of TB                                    | Total n(%) | Sex n (%) |            | Grade n (%) |           |            | Major n (%)       |                       |
|----------------------------------------------------|------------|-----------|------------|-------------|-----------|------------|-------------------|-----------------------|
|                                                    |            | Male      | Female     | Year 3      | Year 2    | Year 1     | Clinical medicine | Non-clinical medicine |
| <b>Students had knowledge of TB signs/symptoms</b> |            |           |            |             |           |            |                   |                       |
| Chronic cough                                      | 597(40.2)  | 501(45.5) | 96(25.0)*  | 262(42.5)   | 118(29.6) | 217(46.0)* | 399(39.2)         | 198(42.2)             |
| Haemoptysis                                        | 756(50.9)  | 608(55.2) | 148(38.5)* | 332(53.8)   | 176(44.2) | 248(52.9)* | 509(50.0)         | 247(52.8)             |
| Fever                                              | 371(25.0)  | 298(27.1) | 73(19.0)*  | 204(33.1)   | 73(18.4)  | 94(20.0)*  | 269(26.5)         | 102(21.7)             |
| Night sweats                                       | 328(22.1)  | 265(24.1) | 63(16.4)*  | 209(33.9)   | 54(13.6)  | 65(13.8)*  | 235(23.1)         | 93(19.8)              |
| Weakness                                           | 398(26.8)  | 348(31.6) | 50(13.0)*  | 212(34.4)   | 73(18.3)  | 113(24.0)* | 270(26.5)         | 128(27.3)             |
| Weight loss                                        | 318(21.4)  | 286(26.0) | 32(8.3)*   | 190(30.8)   | 43(10.8)  | 85(18.1)*  | 220(21.7)         | 98(20.9)              |
| All above TB signs/symptoms                        | 132(8.9)   | 119(10.8) | 13(3.4)*   | 84(13.6)    | 17(4.3)   | 31(6.6)*   | 88(8.7)           | 44(9.4)               |
| <b>Students had knowledge of TB transmission</b>   |            |           |            |             |           |            |                   |                       |
| TB is an infectious disease                        | 1231(82.8) | 893(81.0) | 338(88.0)* | 531(86.1)   | 316(79.4) | 384(81.5)* | 854(84.0)         | 377(80.4)             |
| Transmitted by cough                               | 414(27.9)  | 338(30.7) | 76(19.8)*  | 186(30.1)   | 92(23.1)  | 136(29.0)  | 293(28.8)         | 121(25.8)             |
| Transmitted by sneezing & talking loudly           | 841(56.6)  | 607(55.1) | 234(60.9)* | 386(62.6)   | 191(48.0) | 264(56.3)* | 597(58.8)         | 244(52.0)*            |
| <b>Students had knowledge of TB treatment</b>      |            |           |            |             |           |            |                   |                       |
| TB is a treatable disease                          | 1183(79.6) | 891(81.0) | 292(76.0)* | 477(77.3)   | 318(80.1) | 388(82.6)* | 802(79.0)         | 381(81.4)             |
| Duration of treatment                              | 439(29.5)  | 313(28.5) | 126(32.8)* | 207(33.5)   | 109(27.5) | 123(26.2)* | 304(30.0)         | 135(28.8)             |
| Aware of TB dispensary                             | 404(27.2)  | 267(24.4) | 137(35.7)* | 169(27.4)   | 108(27.1) | 127(27.0)  | 270(26.5)         | 134(28.6)             |
| Aware of free treatment policy                     | 506(34.1)  | 345(31.4) | 161(41.9)* | 197(31.9)   | 123(31.1) | 186(39.5)* | 356(35.1)         | 150(32.0)             |
| Aware of DOTS                                      | 215(14.5)  | 142(12.9) | 73(19.0)*  | 110(17.8)   | 55(13.9)  | 50(10.8)*  | 148(14.6)         | 67(14.3)              |

† $\chi^2$  test used to compare between males and females, different grades, and different majors.

\*P < 0.05

~~Table 2 Knowledge about TB symptoms, transmission and treatment among~~

**undergraduates in medical university in Southwest China\***

| Knowledge of TB                     | Total n (%) | Sex n (%)  |             | Grade n (%) |            |             | Major n (%)     |                     |
|-------------------------------------|-------------|------------|-------------|-------------|------------|-------------|-----------------|---------------------|
|                                     |             | Male       | Female      | Year3       | Year2      | Year1       | Clinic medicine | Non-clinic medicine |
| <b>Knowledge on TB symptoms</b>     |             |            |             |             |            |             |                 |                     |
| Chronic cough                       | 597(40.2)   | 501(45.5)  | 96(25.0)*   | 262(42.5)   | 118(29.6)  | 217(46.0)*  | 399(39.2)       | 198(42.2)           |
| Blood-tinged sputum                 | 756(50.9)   | 608(55.2)  | 148(38.5)*  | 332(53.8)   | 176(44.2)  | 248(52.9)*  | 509(50.0)       | 247(52.8)           |
| Fever                               | 371(25.0)   | 298(27.1)  | 73(19.0)*   | 204(33.1)   | 73(18.4)   | 94(20.0)*   | 269(26.5)       | 102(21.7)           |
| Night sweats                        | 328(22.1)   | 265(24.1)  | 63(16.4)*   | 209(33.9)   | 54(13.6)   | 65(13.8)*   | 235(23.1)       | 93(19.8)            |
| Weakness                            | 398(26.8)   | 348(31.6)  | 50(13.0)*   | 212(34.4)   | 73(18.3)   | 113(24.0)*  | 270(26.5)       | 128(27.3)           |
| Weight loss                         | 318(21.4)   | 286(26.0)  | 32(8.3)*    | 190(30.8)   | 43(10.8)   | 85(18.1)*   | 220(21.7)       | 98(20.9)            |
| <b>Knowledge on TB transmission</b> |             |            |             |             |            |             |                 |                     |
| Known of transmission               | 1231(82.8)  | 893 (81.0) | 338 (88.0)* | 531 (86.1)  | 316 (79.4) | 384 (81.5)* | 854 (84.0)      | 377(80.4)           |
| Cough                               | 414(27.9)   | 338(30.7)  | 76(19.8)*   | 186(30.1)   | 92(23.1)   | 136(29.0)   | 293(28.8)       | 121(25.8)           |
| Sneezing and loudly speaking        | 841(56.6)   | 607(55.1)  | 234(60.9)*  | 386(62.6)   | 191(48.0)  | 264(56.3)*  | 597(58.8)       | 244(52.0)*          |
| <b>Knowledge on TB treatment</b>    |             |            |             |             |            |             |                 |                     |
| Curable disease                     | 1183(79.6)  | 891 (81.0) | 292 (76.0)* | 477 (77.3)  | 318 (80.1) | 388 (82.6)* | 802 (79.0)      | 381(81.4)           |
| Knowing treatment course            | 439(29.5)   | 313 (28.5) | 126 (32.8)* | 207 (33.5)  | 109 (27.5) | 123 (26.2)* | 304 (30.0)      | 135(28.8)           |
| Knowing TB dispensary               | 404(27.2)   | 267 (24.4) | 137 (35.7)* | 169 (27.4)  | 108 (27.1) | 127 (27.0)  | 270 (26.5)      | 134(28.6)           |
| TB free policy                      | 506(34.1)   | 345 (31.4) | 161 (41.9)* | 197 (31.9)  | 123 (31.1) | 186 (39.5)* | 356 (35.1)      | 150(32.0)           |
| Heard of DOTS                       | 215(14.5)   | 142(12.9)  | 73(19.0)*   | 110(17.8)   | 55(13.9)   | 50(10.8)*   | 148 (14.6)      | 67(14.3)            |

\* $\chi^2$  test used to compare between males and females, different grades, and different majors.\* $p < 0.05$ **Table 3 Factors associated with the core knowledge of TB among undergraduates in**

1  
2  
3  
4  
5  
6  
7  
8  
9  
10  
11  
12  
13  
14  
15  
16  
17  
18  
19  
20  
21  
22  
23  
24  
25  
26  
27  
28  
29  
30  
31  
32  
33  
34  
35  
36  
37  
38  
39  
40  
41  
42  
43  
44  
45  
46  
47  
48  
49  
50  
51  
52  
53  
54  
55

**medical university in Southwest China**

| Factors                              | OR (95%CI)                                   |                              |                           |               |                |
|--------------------------------------|----------------------------------------------|------------------------------|---------------------------|---------------|----------------|
|                                      | TB symptoms of cough and blood-tinged sputum | TB as one infectious disease | TB as one curable disease | TB dispensary | TB free policy |
| <b>Gender</b>                        |                                              |                              |                           |               |                |
| Female                               | Reference                                    | Reference                    | Reference                 | Reference     | Reference      |
| Male                                 | 0.1(0.1, 0.2)                                | 1.8(1.3, 2.7)                | 0.8(0.6, 1.1)             | 1.7(1.3, 2.4) | 1.9(1.5, 2.4)  |
| <b>Grade</b>                         |                                              |                              |                           |               |                |
| Year 1                               | Reference                                    | Reference                    | Reference                 | Reference     | Reference      |
| Year 2                               | 1.6(1.5, 1.9)                                | 1.7(1.5, 1.9)                | 1.3(0.9, 1.8)             | 1.1(0.8, 1.5) | 1.6(1.2, 2.0)  |
| Year 3                               | 1.8(1.2,2.6)                                 | 1.2(0.8,1.7)                 | 1.1(0.7, 1.5)             | 1.1(0.8, 1.6) | 1.7(1.2, 2.3)  |
| <b>Major</b>                         |                                              |                              |                           |               |                |
| Clinic medicine                      | Reference                                    | Reference                    | Reference                 | Reference     | Reference      |
| Non-clinic medicine                  | 1.1(0.8, 1.4)                                | 1.7(0.5, 1.9)                | 1.2(0.9, 1.6)             | 1.1(0.8, 1.4) | 0.8(0.6, 1.1)  |
| <b>Access to TB health education</b> |                                              |                              |                           |               |                |
| Yes                                  | Reference                                    | Reference                    | Reference                 | Reference     | Reference      |
| No                                   | 0.5(0.4, 0.7)                                | 0.4(0.3, 0.5)                | 0.6(0.5, 0.7)             | 0.6(0.5, 0.8) | 0.7(0.5, 0.8)  |

56  
57  
58  
59  
60

**Figure legends**



1  
2  
3  
4 **Fig. 1: The Southwestern People's Republic of China.**

5  
6 In this this figure demonstrated Southwest China. The place marked with red color is  
7  
8 Southwest China which includes the municipality of Chongqing, the provinces of Sichuan,  
9  
10 Yunnan and Guizhou, and the Tibet Autonomous Regions.  
11  
12  
13  
14  
15

16 **Fig. 2: Knowledge of TB symptoms and transmission among undergraduate medical**  
17 **students in Southwest China.**

18  
19  
20 Figure 2A presents undergraduate medical students' knowledge of classical symptoms of TB;  
21  
22  
23 Figure 2B presents students' knowledge of means of TB transmission.  
24  
25

26 **Fig. 3: Knowledge of TB free policy and DOTS among undergraduate medical students**  
27 **in Southwest China.**

28  
29  
30 Figure 3A presents undergraduate medical students' knowledge of the free TB treatment  
31  
32 policy in China; Figure 3B presents undergraduate medical students' knowledge of the  
33  
34 contents of the Directly Observed Therapy-Short Course (DOTS) program.  
35  
36  
37  
38

39 **Fig. 4: Knowledge of core TB knowledge among undergraduate medical students in**  
40 **Southwest China.**

41  
42  
43 Figure 4A presents the percentage of undergraduate medical students correctly answered each  
44  
45 question for core TB knowledge; Figure 4B presents percentage of undergraduate medical  
46  
47 students correctly answered none, only one question, any 2, any 3, any 4 and any 5 questions  
48  
49 for core TB knowledge.  
50  
51  
52

53  
54 This figure presents undergraduate medical students' knowledge of core TB symptoms

55  
56 **Fig. 5: Sources of TB knowledge among undergraduate medical students in Southwest**  
57  
58

1  
2  
3  
4 **China.**  
5

6 This figure presents undergraduate medical students' major sources of information on TB.  
7  
8  
9  
10  
11  
12  
13  
14  
15  
16  
17  
18  
19  
20  
21  
22  
23  
24  
25  
26  
27  
28  
29  
30  
31  
32  
33  
34  
35  
36  
37  
38  
39  
40  
41  
42  
43  
44  
45  
46  
47  
48  
49  
50  
51  
52  
53  
54  
55  
56  
57  
58  
59  
60

For peer review only



**A survey of TB knowledge among medical students in Southwest China: Is the information reaching the target?**

|                                 |                                                                                                                                                                                                                                                                                                                                                                                                                                                                                                                                               |
|---------------------------------|-----------------------------------------------------------------------------------------------------------------------------------------------------------------------------------------------------------------------------------------------------------------------------------------------------------------------------------------------------------------------------------------------------------------------------------------------------------------------------------------------------------------------------------------------|
| Journal:                        | <i>BMJ Open</i>                                                                                                                                                                                                                                                                                                                                                                                                                                                                                                                               |
| Manuscript ID:                  | bmjopen-2013-003454.R2                                                                                                                                                                                                                                                                                                                                                                                                                                                                                                                        |
| Article Type:                   | Research                                                                                                                                                                                                                                                                                                                                                                                                                                                                                                                                      |
| Date Submitted by the Author:   | 12-Aug-2013                                                                                                                                                                                                                                                                                                                                                                                                                                                                                                                                   |
| Complete List of Authors:       | Zhao, Ying; Chengdu University of Traditional Chinese Medicine, School of Nursing<br>Ehiri, John; University of Arizona, Mel & Enid Zuckerman College of Public Health, Division of Health Promotion Sciences,<br>Li, Daikun; University-Town Hospital of Chongqing University of Medical Sciences, Department of Laboratory Medicine<br>Luo, Xinglun; Center of Disease Control in Shapingba District, Department of TB control<br>Li, Ying; Third Military Medical University, Department of Social Medicine and Health Service Management, |
| <b>Primary Subject Heading</b>: | Health services research                                                                                                                                                                                                                                                                                                                                                                                                                                                                                                                      |
| Secondary Subject Heading:      | Infectious diseases, Public health                                                                                                                                                                                                                                                                                                                                                                                                                                                                                                            |
| Keywords:                       | INFECTIOUS DISEASES, Public health < INFECTIOUS DISEASES, Tuberculosis < INFECTIOUS DISEASES                                                                                                                                                                                                                                                                                                                                                                                                                                                  |
|                                 |                                                                                                                                                                                                                                                                                                                                                                                                                                                                                                                                               |

SCHOLARONE™  
Manuscripts

only

1  
2  
3  
4 **A survey of TB knowledge among medical students in Southwest China: Is**  
5  
6 **the information reaching the target?**  
7  
8  
9

10 Ying Zhao<sup>1a</sup>

11 John Ehiri<sup>2a</sup>

12 Daikun Li<sup>3</sup>

13 Xinglun Luo<sup>4</sup>

14 Ying Li<sup>5§</sup>

15  
16  
17  
18  
19  
20  
21  
22  
23  
24  
25  
26  
27  
28 **§ Correspondence to:** Ying Li, Department of Social Medicine and Health Service  
29 Management, Third Military Medical University, Chongqing 400038, China.  
30  
31 (E-mail: [lilyliying2012@163.com](mailto:lilyliying2012@163.com); [yingli@email.arizona.edu](mailto:yingli@email.arizona.edu))  
32  
33

34 <sup>a</sup>Ying Zhao and John Ehiri contributed equally to this work.  
35  
36  
37  
38  
39  
40  
41  
42  
43  
44  
45  
46  
47  
48  
49  
50  
51  
52  
53  
54  
55  
56  
57  
58  
59  
60

## Abstract

**Objectives:** TB control in schools is a concern in low- and middle-income countries with high TB burdens. TB knowledge is recognized as important for TB control in China, which has one of the highest TB prevalence in the world. Accordingly, National TB Control Guideline in China emphasized TB health education in schools as one of the core strategies for improving TB knowledge among the population. It was important to assess the level of TB knowledge in schools following five-year implementation of the guideline, in order to determine if the information was reaching the targets.

**Design:** A cross-sectional study.

**Methods and study setting:** This survey assessed TB knowledge and access to TB health information by questionnaire survey with 1,486 undergraduates from two medical universities in southwest China.

**Results:** Overall, the students had inadequate TB knowledge. Only 24.1%, 27.2%, and 34.1% of the students had knowledge of TB symptoms of cough/blood-tinged sputum, their local TB dispensaries, and free TB treatment policy, respectively. Very few (14.5%) had heard about the Directly Observed Therapy Short Course (DOTs), and only about half (54%) had ever accessed TB health education information. Exposure to health education messages was significantly associated with increased knowledge of the five core TB knowledge as follows: classic TB symptoms of cough/blood-tinged sputum (OR[95%CI]: 0.5[0.4, 0.7]), TB modes of transmission (OR[95%CI]: 0.4[0.3, 0.5]), curability of TB (OR[95%CI]: 0.6[0.5, 0.7]), location and services provided by TB local dispensaries (OR[95%CI]: 0.6[0.5, 0.8]), and the national free TB treatment policy (OR[95%CI]: 0.7[0.5, 0.8]).

1  
2  
3  
4 **Conclusions:** The findings pose the question of whether it is time for a rethink of the current  
5  
6 national and global approach to TB health education/promotion which favors promotion of  
7  
8 awareness on World TB Days rather than regular community sensitization efforts.  
9  
10

11  
12  
13 **Key words:** *Tuberculosis knowledge; undergraduate students; TB health promotion; China;*  
14  
15  
16  
17  
18  
19  
20  
21  
22  
23  
24  
25  
26  
27  
28  
29  
30  
31  
32  
33  
34  
35  
36  
37  
38  
39  
40  
41  
42  
43  
44  
45  
46  
47  
48  
49  
50  
51  
52  
53  
54  
55  
56  
57  
58  
59  
60

## ARTICLE SUMMARY

### Article focus:

- To describe knowledge of TB among undergraduate medical students.
- To explore factors associated with TB knowledge among undergraduate medical students.
- To attract attention to reform of school-based TB health education and promotion

### Key messages

- Overall, undergraduate medical students had inadequate TB knowledge.
- Undergraduate students had limited access to TB health education/promotion.
- A rethink of current national and global approaches to TB health education/promotion is urgently needed in the light of the current global burden of TB.

### Strengths and limitations of this study

- The main strength of the manuscript is the establishment of a baseline level of TB knowledge among undergraduate medical students. This is the first study to assess school-based TB health education/promotion in the study setting.
- The main limitation is that the study used a cross-sectional design, which did not assess TB knowledge changes before and after school TB health education/promotion.

## INTRODUCTION

The 16<sup>th</sup> Global Report on Tuberculosis (TB) published by WHO in 2012 showed that the Millennium Development Goal target for halting and reversing the TB epidemic by 2015 had already been achieved, with mortality and incidence rates falling in 22 high-burden countries. Nevertheless, the global burden of TB remains untenable,<sup>1</sup> in high-burden countries such as China. Globally, TB remains the second leading cause of death from infectious diseases (after HIV/AIDS).<sup>1</sup> Globally over the past five years, there has been a marked increase in the number of TB patients diagnosed with multi-drug resistant TB (MDR-TB).<sup>1</sup> China has the world's second largest tuberculosis epidemic and has contributed significantly to this MDR-TB increase. In recent years, the country has undertaken measures to control TB, and in order to evaluate the progress of TB control in the past decade, the country launched the 5th National Sampling Survey of TB Epidemiology in 2010.<sup>2</sup> Results of the survey showed an estimated 8.28 million cases of pulmonary TB (PTB) in the country from 2001 to 2010.<sup>2</sup> In spite of concerted international and national efforts to address TB in the country, annual prevalence (per 100,000 people) declined only minimally from 466 in 2000 to 459 in 2010.<sup>2</sup> Similarly, incidence of MDR-TB among PTB cases has remained unchanged in the past decade, and resistance to first-line drugs among newly diagnosed TB patients rose from 34.2 % in 2007/2008<sup>3</sup> to 36.9% in 2010.<sup>2</sup>

Owing to lack of TB knowledge, less than half of patients with TB symptoms seek healthcare timely.<sup>2</sup> Available evidence shows that only 59% TB patients comply with treatment, and among the public, only 57% have proper TB knowledge.<sup>2</sup> Limited knowledge about signs and



1  
2  
3  
4 symptoms of TB often results in delays in TB diagnosis and treatment<sup>4</sup>, which in return,  
5  
6 increases not only the risk of TB transmission, but also the development of MDR-TB.  
7  
8 China's MDR-TB prevalence rate of 6.8% is the highest in the world.<sup>2</sup>  
9

10  
11  
12  
13  
14 TB control among undergraduate students is recognized as a concern in low- and  
15  
16 middle-income countries with high TB burdens. Undergraduate students usually live in  
17  
18 relative overcrowding conditions that are conducive to TB outbreaks.<sup>5</sup> TB outbreaks among  
19  
20 students have been reported even in such low-burden countries as the UK, Italy, Ireland, and  
21  
22 the USA.<sup>6-10</sup> Chinese undergraduate students are recognized as a particularly vulnerable  
23  
24 population for TB. The TB prevalence (per 100,000) among Chinese students has been  
25  
26 reported to be as high as 1,520, which is significantly higher than the prevalence (459) for the  
27  
28 general population.<sup>11</sup> Chongqing, Guizhou, and Shanxi provinces were the three provinces  
29  
30 with the highest TB burden among undergraduate students between 2005 and 2008.<sup>12</sup> In  
31  
32 addition, several TB outbreaks among undergraduate students were recently reported in  
33  
34 Chongqing, Liangning, Zhejiang, Shangdong, and Guizhou, with the incidence rates ranging  
35  
36 from 620 to 31,370 per 100,000.<sup>11-17</sup>  
37  
38  
39  
40  
41  
42  
43  
44  
45

46 Medical students in university can expose to TB infection during clinic rotations.<sup>18</sup> Thus,  
47  
48 adequate knowledge of TB epidemiology and control is critically important for this population.  
49  
50 Knowledge of TB among medical undergraduates in university is also important since they  
51  
52 represent potential future physicians or leaders in the fight against TB.<sup>19</sup> In 1997, WHO  
53  
54 released a report following a workshop on Tuberculosis Control and Medical Schools held in  
55  
56  
57  
58  
59  
60

1  
2  
3  
4 Rome, Italy, which stressed the importance of graduating medical students with proper  
5  
6 knowledge and skills related to effective TB control.<sup>20</sup> WHO later released a manual that  
7  
8 aims to inform medical students and medical practitioners about best practices in managing  
9  
10 TB patients.<sup>21</sup> Several studies have documented inadequate TB knowledge and poor  
11  
12 compliance with TB treatment guidelines among practicing physicians.<sup>22-24</sup> In countries  
13  
14 where TB (including MDR-TB) presents significant challenges to public health, equipping  
15  
16 emerging physicians with in-depth TB knowledge is of critical importance in the overall  
17  
18 efforts to reduce the burden of the disease. In China, school TB health promotion was  
19  
20 emphasized in the 2008 National Guideline for TB Control.<sup>25</sup> It was important to assess the  
21  
22 level of TB knowledge in schools following five-year implementation of the guideline. This  
23  
24 survey assessed TB knowledge and access to TB health information among 1,486 pre-clinical  
25  
26 undergraduate students from two medical universities in southwest China which has one of  
27  
28 the highest TB burdens of in the country. It was hoped that the findings could help to identify  
29  
30 whether the information was reaching the targets, and thus engender efforts to strengthen TB  
31  
32 school education in the region and similar locales in low and middle income countries with  
33  
34 high TB burden.  
35  
36  
37  
38  
39  
40  
41  
42  
43  
44  
45

## 46 **METHODS**

### 47 **Study setting**

48  
49 The study setting, Southwest China, includes Chongqing Municipality, the provinces of  
50  
51 Sichuan, Yunnan, Guizhou, and Tibet Autonomous Region (Figure 1) where prevalence rates  
52  
53 (cases per 100,000) of active TB (695), smear positive TB (105), and culture positive TB  
54  
55  
56  
57  
58  
59  
60

1  
2  
3  
4 (198) are much higher than the national prevalence rates of 459, 66, and 119, respectively.<sup>2</sup>  
5

6 Southwest China has a population of more than 19 million which represent more than 10% of  
7  
8 China's population of 1.3 billion people.  
9

## 10 11 12 13 **Participants**

14  
15  
16 There were 10 medical universities in Southwest China. These universities offer 5-year  
17  
18 majors in clinical medicine, public health, pharmacy, medical laboratory, Chinese medicine,  
19  
20 and nursing. We randomly selected two of the 10 universities and restricted our sample frame  
21  
22 to pre-clinical students (students who have not received clinic curriculum) in their first to  
23  
24 third years of training. We excluded fourth- and fifth-year students since they might have  
25  
26 obtained TB knowledge from their clinical training as part of their clinical curriculum rather  
27  
28 than from government school TB health education. The survey was conducted between  
29  
30 November 2011 and May 2012 and focused on the assessment of TB knowledge among the  
31  
32 respondents. The sample frame consisted of 20,000 eligible students. To obtain a power of  
33  
34 80% and a confidence level of 95%, we calculated the study sample to be 1536.<sup>26</sup> During  
35  
36 recruitment, potential participants were approached and provided with detailed explanation of  
37  
38 the study and its objectives. They were then asked if they would be interested in volunteering  
39  
40 to participate. Those who expressed interest were asked to read the informed consent form,  
41  
42 and were assured of confidentiality. They were then asked to sign the informed consent form  
43  
44 as a conformation of their voluntary participation in the study. Approval for the study was  
45  
46 obtained from the Institutional Review Boards of the College of Preventive Medicine, Third  
47  
48 Military Medical University, Chongqing, China (October, 20, 2011) and the School of  
49  
50  
51  
52  
53  
54  
55  
56  
57  
58  
59  
60

1  
2  
3  
4 Nursing, Chengdu University of Traditional Chinese Medicine, Chengdu, Sichuan Province,  
5  
6 China (28 April, 2012).  
7  
8  
9

### 10 11 **Questionnaire**

12  
13 The survey was cross-sectional in design. Following participant enrollment in the study, data  
14  
15 were collected by means of a self-administered questionnaire that assessed participants'  
16  
17 knowledge about TB signs/symptoms, transmission, management, and control. Data were  
18  
19 elicited on the following variables: socio-demographic profile (age, sex), degree major  
20  
21 (clinical and non-clinical), year in the medical program, TB knowledge (symptoms, mode of  
22  
23 transmission, treatment, knowledge of TB control facilities in the study setting, local TB  
24  
25 control policies and program), and core knowledge of TB, namely, five core TB knowledge  
26  
27 areas which include: (i) classic TB symptoms of cough/blood-tinged sputum, (ii) TB modes  
28  
29 of transmission, (iii) curability of TB, (iv) location and services provided by TB local  
30  
31 dispensaries, and (v) the national free TB treatment policy.  
32  
33  
34  
35  
36  
37  
38  
39  
40

### 41 **Data analysis**

42  
43 Epi-data 6.0 was used for data entry. Data analyses were conducted using the Statistical  
44  
45 Package for Social Sciences version 18.0. To assess TB knowledge among the participants,  
46  
47 we calculated the percentage of people who provided correct responses to questions about the  
48  
49 6 symptoms of TB, 3 ways of transmitting TB, 5 items related to TB treatment, and 5 core  
50  
51 knowledge of TB. We used chi-square statistics ( $\chi^2$ ) to assess participants' responses by  
52  
53 gender, year in medical school, and degree major. A binary logistic regression model which  
54  
55  
56  
57  
58  
59  
60

1  
2  
3 included variables with statistical significance on the  $\chi^2$  test, were used to examine factors  
4  
5 associated with core knowledge of TB among the respondents. We used a two-tailed  
6  
7 probability level of  $<0.05$  as the level of statistical significance.  
8  
9

## 10 11 12 13 **RESULTS**

### 14 15 16 17 18 **Demographic characteristics of participants**

19  
20 A total of 1,486 undergraduate medical students participated in the survey. Of these, 617 were  
21  
22 in their first year medical training, 399 in the second year, and 470 in the third year. A  
23  
24 majority of the respondents (74.2%; n=1102) were male, and 68.4% students were majoring  
25  
26 in clinical medicine. Only 54% of the students indicated having access to some kind of TB  
27  
28 health information (Table 1).  
29  
30  
31  
32

### 33 34 35 36 **Knowledge of TB symptoms**

37  
38 The respondents' knowledge of symptoms is shown in Table 2. About 18% (n=261) had no  
39  
40 knowledge of any TB symptoms, and less than 10% (n=132) were able to identify all TB  
41  
42 symptoms (Figure 2 A). As for overall knowledge of TB symptoms, 10.8% (n=119) of males  
43  
44 and 3.4% (n=13) of female had knowledge of all of the classic symptoms of TB ( $p \leq 0.05$ ).  
45  
46 Slightly more than thirteen per cent (13.6%; n=84) of students in the third year of medical  
47  
48 school, 4.3 % (n=17) of those in the second year, and 6.6% (n=31) of first-year students had  
49  
50 knowledge of all of the classic symptoms ( $p \leq 0.05$ ). There were no statistically significant  
51  
52 differences in knowledge of TB symptoms between students in clinical and non-clinical  
53  
54  
55  
56  
57  
58  
59  
60

1  
2  
3  
4 degree majors ( $p>0.05$ ) (Table 2).  
5  
6  
7

### 8 9 **Knowledge about TB transmission**

10  
11 Only 27.9% ( $n=414$ ) of the respondents were aware that TB could be transmitted through  
12 exposure to droplet nuclei from the cough of an infected person (Table 2), and only 14.7%  
13 ( $n=218$ ) knew the two main routes of TB transmission (Figure 2B). Overall, more females  
14 ( $88\%$ ;  $n=338$ ) and third-year students ( $86.1\%$ ;  $n=531$ ) knew the transmission routes of TB  
15  
16 ( $p<0.05$ ).  
17  
18  
19  
20  
21  
22  
23  
24  
25

### 26 27 **Knowledge about TB treatment and policies**

28  
29 Although 80% of the students knew that TB was curable, only 30% ( $n=446$ ) knew the  
30 duration of TB treatment. Only 27.2% ( $n=404$ ) knew TB control facilities (TB dispensaries);  
31  
32 34% and 14.5% had heard of the national free TB treatment policy and DOTS, respectively  
33  
34 (Table 2). A greater proportion of female than male respondents had better knowledge  
35  
36 about the duration of TB treatment, TB control facilities, free TB treatment policy, and  
37  
38 DOTS ( $P\leq 0.05$ ). Overall, third-year students had better knowledge of TB treatment except  
39  
40 for knowledge on TB as a curable disease and free treatment policy. There were no  
41  
42 significant differences between students in clinical and non-clinical majors (Table 2). Only  
43  
44 12% ( $n=178$ ) of the respondents knew all the 4 items included in the free TB treatment  
45  
46 policy (registration, sputum test, chest X-rays, and anti-TB drugs) (Figure 3A). Less than  
47  
48 10% ( $n=106$ ) of the students were familiar with all 5 items of DOTS (Figure 3B).  
49  
50  
51  
52  
53  
54  
55  
56  
57  
58  
59  
60

### Core knowledge of TB

With regard to core knowledge of TB, less than half students had knowledge of TB symptoms of cough/blood-tinged sputum, their local TB dispensaries, and the national free TB treatment policy (Figure 4A). Only 2.4% were familiar with all five core TB knowledge areas (Figure 4B). Multiple logistic regression analysis indicated that access to health education was associated with the five core TB knowledge: (OR [95%CI]: 0.5[0.4, 0.7]) for classic TB symptoms of cough/blood-tinged sputum, (OR [95%CI]: 0.4[0.3, 0.5]) for means of TB transmission, (OR [95%CI]: 0.6[0.5, 0.7]) for curability of TB, (OR [95%CI]: 0.6[0.5, 0.8]) for TB dispensaries, and (OR [95%CI]: 0.7[0.5, 0.8]) for the national free TB treatment policy. Males had poor knowledge related to transmission of TB, TB dispensaries and free TB treatment policy (OR [95%CI]: 1.8[1.3, 2.7], 1.7[1.3, 2.4], 1.9[1.5, 2.4]), respectively. Third year students had better knowledge of TB compared with students in the first and second years (Table 3).

### Sources of TB Knowledge

With regard to how the respondents gained awareness and understanding of TB, survey results indicated that the most frequent source of information was textbooks, the second was the Internet, and the third was the media (newspaper and billboards) (Figure 5).

## DISCUSSION

TB is still one of the most important global public health threats. If global control of the disease does not improve, the annual global incidence is expected to increase from the current 21% to 61% by 2020.<sup>27</sup> Early detection and adequate treatment are critical control measures.

1  
2  
3  
4 In spite of the fact that China carries one of the highest TB burdens in the world, lack of  
5  
6 knowledge about the disease remains an abiding problem in the country, and thus, presents a  
7  
8 barrier to control efforts.<sup>2</sup>  
9

10  
11  
12  
13  
14 Medical students are China's future health professionals and clinical leaders. Thus,  
15  
16 understanding their level of awareness about TB is important. Unfortunately, this survey  
17  
18 revealed that these students had generally poor knowledge of TB. Surveys conducted in other  
19  
20 countries have reported inadequate knowledge of TB among medical professions students. In  
21  
22 Turkey for example,<sup>28</sup> a study of 828 fourth-year medical students found that they lacked  
23  
24 skills in interpreting radiology and smears even in their last year of medical school. One  
25  
26 study in Brazil found that although medical students had had good knowledge of biosafety  
27  
28 norms, they engaged in risky behaviors in health care settings where TB patients were  
29  
30 assisted<sup>29</sup> Similarly, a study in the United States reported that, prior to implementation of the  
31  
32 National Tuberculosis Curriculum Consortium (NTCC) in U.S. medical schools, about  
33  
34 one-third of medical students did not know the method for administering tuberculin skin test  
35  
36 or that the BCG vaccine was not a contraindication for TB skin testing.<sup>30</sup>  
37  
38  
39  
40  
41  
42  
43  
44  
45

46 The 2008 National Guideline for TB Control in China emphasizes five items of core  
47  
48 knowledge of TB.<sup>25</sup> In the present study, it is of particular concern that the students scored  
49  
50 very low in the TB core knowledge domain. The average knowledge base for all of the 5 core  
51  
52 knowledge domains was only 2.4%, which was lower than the score (43.45%) reported in a  
53  
54 previous study in China's Hunan province.<sup>31</sup> We also found that only 24.1% knew the classic  
55  
56  
57  
58  
59  
60



1  
2  
3  
4 symptoms of TB (cough and blood stained sputum), which was similar to the report in  
5  
6 Nanjing, China where only 26.3% students were familiar with TB symptoms.<sup>32</sup> This study  
7  
8 observed that less than 30% of the respondents knew the course of TB treatment and were  
9  
10 aware of TB control facilities in Southwest China which was lower than the rate observed in  
11  
12 a previous study (36.66%).<sup>32</sup> We found that only 30% knew the free TB treatment policy in  
13  
14 China, which was similar to that reported in a related study.<sup>33</sup> One-third of our respondents  
15  
16 could not identify a mode of transmission for TB. A survey of final year medical students in  
17  
18 China's Hunan province in 2000 concluded that knowledge and practical competencies  
19  
20 regarding TB among final-year medical students were generally inadequate.<sup>34</sup> Results of our  
21  
22 current study showed that the situation has not improved in the past 13 years.  
23  
24  
25  
26  
27  
28  
29  
30

31 TB education has been widely recognized as an effective way to promote TB knowledge  
32  
33 among students. In 2003, the U.S. National Institutes of Health (NIH) perceived a need to  
34  
35 strengthen the teaching of TB to health-profession students, and funded the National  
36  
37 Tuberculosis Curriculum Consortium (NTCC) to help address this need.<sup>30</sup> Evidence shows  
38  
39 that this has contributed to marked improvement in TB knowledge among students,  
40  
41 nationally.<sup>30, 35-36</sup> Strong recommendations to strengthen TB knowledge of medical and other  
42  
43 health-professions students through education have also been made by other countries.<sup>37</sup>  
44  
45  
46  
47 Although the National Guideline for TB Control in China emphasizes TB health education  
48  
49 and promotion for the public, TB patients, and students, TB health education and promotion  
50  
51 in universities remain sub-optimal.<sup>25</sup> Findings from many studies have shown that  
52  
53 40%-63.7% of students reported "hearing from others" as their primary source of information  
54  
55  
56  
57  
58  
59  
60

1  
2  
3  
4 about TB.<sup>32,37</sup> This study also found that only 54% students had ever received TB health  
5  
6 education. Accessing TB health education was significantly associated with core knowledge  
7  
8 of TB. Given that non-clinical students have less opportunity to learn about TB as part of  
9  
10 their regular curriculum, school TB health education should be seen as a primary source of  
11  
12 information on TB for them.  
13  
14

## 15 16 17 18 19 **CONCLUSION**

20  
21  
22  
23  
24 In countries with high TB burden, it is important that all opportunities to raise population  
25  
26 awareness about the disease are used to the optimum. In line with the WHO settings approach  
27  
28 to health promotion,<sup>20</sup> schools should be seen as important avenues for TB health education  
29  
30 given the multiplier effect of such intervention is likely to have on the students, their families,  
31  
32 communities and others in their social networks.<sup>20</sup> Unfortunately, there is the tendency to  
33  
34 focus promotion of TB awareness on national/global TB Control Days to the neglect of a  
35  
36 plethora of opportunities for ongoing promotion in diverse settings. The overall poor  
37  
38 knowledge of TB among medical demonstrated by this study supports the need to increase  
39  
40 school TB health promotion, especially in the light of recent outbreaks of TB in universities  
41  
42 in Southwest China.<sup>13,17</sup> Given the high burden of TB in southwest China, especially in rural  
43  
44 provinces, TB health promotion in schools should be strengthened on an ongoing basis and in  
45  
46 coordination with local TB control departments and district-level Centers for Disease Control  
47  
48 and Prevention (CDC). There is a need for targeted efforts to educate students about TB since  
49  
50  
51  
52  
53  
54  
55  
56  
57  
58  
59  
60

1  
2  
3  
4 the students can be a major source of information to rural dwellers, including their own  
5  
6 families and others in their circles of influence.  
7

### 8 9 **Author affiliations**

10  
11 <sup>1</sup>School of Nursing, Chengdu University of Traditional Chinese Medicine, Chengdu, Sichuan  
12  
13 Province, China.  
14

15  
16 <sup>2</sup> Division of Health Promotion Sciences & The Global Health Institute, Mel & Enid  
17  
18 Zuckerman College of Public Health, , University of Arizona, Tucson, AZ, USA.  
19

20  
21 <sup>3</sup>Department of Laboratory Medicine, University-Town Hospital of Chongqing University of  
22  
23 Medical Sciences, No. 55 Daxuecheng Road, Shapingba District, Chongqing, China.  
24

25  
26 <sup>4</sup>Department of TB control, Center of Disease Control in Shapingba District, Chongqing, PR  
27  
28 China.  
29

30  
31 <sup>5</sup>Department of Social Medicine and Health Service Management, Third Military Medical  
32  
33 University, No.30 Gaotanyan Road, Shapingba District, Chongqing, China.  
34  
35

36  
37 **Contributors** YL designed this survey, JE guided the questionnaire design and data  
38  
39 collection, YZ, DL and XL collected data, DL managed data, YZ analyzed data. YZ and YL  
40  
41 drafted the manuscript; JE edited the manuscript. All authors interpreted the results, revised  
42  
43 the report and approved the final version.  
44  
45

46  
47 **Funding:** the present study was funded by National Natural Science Foundation of China  
48  
49 (Award #: 81001297)  
50

51  
52 **Competing interests** None.  
53

54  
55  
56 **Ethics approval** The ethics committees of the two study universities approved the study  
57  
58

1  
2  
3  
4 protocol prior to its implementation.  
5

6 **Data sharing statement** No additional data are available.  
7

8  
9 **References**

- 10  
11 1. World Health Organization, 2012. Global Tuberculosis report.  
12  
13 [http://apps.who.int/iris/bitstream/10665/75938/1/9789241564502\\_eng.pdf](http://apps.who.int/iris/bitstream/10665/75938/1/9789241564502_eng.pdf)  
14  
15  
16 2. Wang Y. Report of the fifth national sampling survey of TB epidemiology. Beijing:  
17  
18 Military Medical Science Press. 2011;1-7.  
19  
20  
21 3. Zhao Y, Xu S, Wang L, et al. National survey of drug-resistant tuberculosis in China. *N*  
22  
23 *Engl J Med* 2012; 366:2161–2170  
24  
25  
26 4. Li Y, Ehiri J, Tang S, et al. Factors associated with patient, and diagnostic delays in  
27  
28 Chinese TB patients: a systematic review and meta-analysis. *BMC Med.* 2013;11(1):156.  
29  
30  
31 5. Barbara V. *Epidemiology in Health Care* (3rd Edition). NJ: Prentice Hall;1998  
32  
33  
34 6. The Lodi Tuberculosis Working Group. A school- and community-based outbreak of  
35  
36 *Mycobacterium tuberculosis* in northern Italy, 1992-3. *Epidemiol Infect* 1994; 113:  
37  
38 83-93.  
39  
40  
41 7. Ridzon R, Kent JH, Valway S, et al. Outbreak of drug-resistant tuberculosis with  
42  
43 second-generation transmission in a high school in California. *J Pediatr* 1997; 131:  
44  
45 863-868.  
46  
47  
48  
49 8. Hoge CW, Fisher L, Donnell HD Jr, et al. Risk factors for transmission of *Mycobacterium*  
50  
51 *tuberculosis* in a primary school outbreak: lack of racial difference in susceptibility to  
52  
53 infection. *Am J Epidemiol* 1994; 139: 520-530.  
54  
55  
56  
57  
58  
59  
60

- 1  
2  
3  
4 9. Quigley C. Investigation of tuberculosis in an adolescent. The Outbreak Control Team.  
5  
6 *Common Dis Rep CDR Revl* 1997; 7: R113-R116.  
7
- 8  
9 10. Shannon A, Kelly P, Lucey M, et al. Isoniazid resistant tuberculosis in a school outbreak:  
10  
11 the protective effect of BCG. *Eur Respir J* 1991; 4: 778-782.  
12
- 13  
14 11. Wang H, Pan JP, Zhang TH, et al. Survey on the knowledge, attitude and behaviors of TB  
15  
16 among college students. *Chinese Journal of Public health* 2006; 22( 6): 661-662.  
17
- 18  
19 12. Du X, Chen W, Huang F. Analysis on TB of national report of students TB during  
20  
21 2004-2008. *Chinese health education* 2009; 25(11):803-805.  
22
- 23  
24 13. Zhou S, Chen M. Epidemiology survey on outbreaks of TB in the universities in  
25  
26 Chongqing. *Health Medicine Research and Practice in Higher Institutions*  
27  
28 2005;2(2):7-10.  
29
- 30  
31 14. Bi HY, Meng W, Liu DS. Epidemiology survey on outbreaks of TB in universities in  
32  
33 Dandong city. *Chinese journal of health laboratory technology* 2005; 15(11):1377  
34
- 35  
36 15. Wu M, Luo J, Lu M, et al. Epidemiology survey on outbreak of TB in university in  
37  
38 Hangzhou city. *Journal of medical research* 2006; 35(6): 61-63.  
39
- 40  
41 16. Lu QQ, Ju YX, Li YY. Survey on outbreak of TB in university. *Chinese journal of school*  
42  
43 *health* 2007; 28(12): 1147.  
44
- 45  
46 17. Lan MB, Yu YL: Zhang HW. Epidemiology survey on outbreak of TB in university in  
47  
48 Guizhou province. *Chinese modern doctor* 2009; 47(29):102-103.  
49
- 50  
51 18. Silva VM, Cunha AJ, Kritski AL. Tuberculin skin test conversion among medical  
52  
53 students at a teaching hospital in Rio de Janeiro, Brazil. *Infect Control Hosp Epidemiol*  
54  
55 2002; 23:591–594.  
56  
57  
58  
59  
60

- 1  
2  
3  
4 19. Mehta D, Bassi R, Singh M, et al. To study the knowledge about tuberculosis  
5  
6 management and national tuberculosis program among medical students and aspiring  
7  
8 doctors in a high tubercular endemic country. *Ann Trop Med Public Health* 2012; 5:206-8.  
9  
10  
11 20. WHO. Tuberculosis control and medical schools. Report of a WHO Workshop, Rome,  
12  
13 Italy 29-31 October 1997. [http://whqlibdoc.who.int/hq/1998/WHO\\_TB\\_98.236.pdf](http://whqlibdoc.who.int/hq/1998/WHO_TB_98.236.pdf)  
14  
15  
16 21. Nadia AK, Donald A E. Tuberculosis. A manual for medical students. World Health  
17  
18 Organization 2005, WHO/CDS/TB/99.272.  
19  
20  
21 22. Arif K, Ali SA, Amanullah S. Physician compliance with national tuberculosis treatment  
22  
23 guidelines: A university hospital study. *Int J Tuberc Lung Dis* 1997; 2:2225-30.  
24  
25  
26 23. LoBue PA, Moser K, Catanzaro A. Management of tuberculosis in San Diego County: A  
27  
28 survey of physicians' knowledge, attitudes and practices. *Int J Tuberc Lung Dis* 2001;  
29  
30 5:933-8.  
31  
32  
33 24. Khan JA, Zahid S, Khan R, et al. Medical interns' knowledge of TB in Pakistan. *Trop*  
34  
35 *Doct* 2005; 35:144-7.  
36  
37  
38 25. Center for Disease Control in China, 2008. The operational guideline for Tuberculosis  
39  
40 control program in China, 2008. Beijing: Ministry of Health. 101-105.  
41  
42  
43 26. Braden CR. Infectiousness of a university student with laryngeal and cavitary tuberculosis.  
44  
45 Investigative team. *Clin Infect Dis*. 1995; 21: 565-70.  
46  
47  
48 27. Dye C, Garnett GP, Sleeman K, et al. Prospects for worldwide tuberculosis control under  
49  
50 the WHODOTS strategy. *Lancet* 1998; 352:1886-91.  
51  
52  
53 28. Kilicaslan Z, Kiyan E, Erkan F, et al. Evaluation of undergraduate training on  
54  
55 tuberculosis at Istanbul Medical School. *Int J Tuberc Lung Dis* 2003; 7:159-164.  
56  
57  
58  
59  
60

- 1  
2  
3  
4 29. Teixeira EG, Menzies D, Cunha AJ, et al. Knowledge and practices of medical students to  
5 prevent tuberculosis transmission in Rio de Janeiro, Brazil. *Rev Panam Salud Publica*.  
6  
7 2008; 24(4):265-70.  
8  
9  
10  
11 30. Jackson M, Harrity S, Hoffman H, Catanzaro A. A survey of health-profession students for  
12 knowledge, attitudes, and confidence about tuberculosis, 2005. *BMC Public Health* 2007;  
13  
14 7:219.  
15  
16  
17  
18 31. Feng SD, Yang SQ, Ling HY. Investigation on knowledge, attitude and behavior  
19 regarding tuberculosis in university students in Hengyan City. *Chin J School Doctor* 2011;  
20  
21 25(11):815-817.  
22  
23  
24  
25  
26 32. Zhang Z, Zhang XN, Cao SY, et al. Cognition of tuberculosis related knowledge and  
27 attitude among college students in Nanjing. *Chin J Sch Health* 2012;33 (3): 263-264.  
28  
29  
30  
31 33. Yan HY. Survey on the knowledge, attitude and behaviors related to TB among  
32 undergraduate students in universities. *Chin J Sch Health* 2009; 30(7):639.  
33  
34  
35  
36 34. Bai LQ, Ziao SY, Xie HW, et al. Knowledge and practice regarding tuberculosis among  
37 final-year medical students in Hunan, China. *Zhonghua Jie He He Hu Xi Za Zhi* 2003;  
38  
39 26(8):458-461.  
40  
41  
42  
43 35. Harrity S, Jackson M, Hoffman H, et al. The National Tuberculosis Curriculum  
44 Consortium: a model of multi-disciplinary educational collaboration. *Int J Tuberc Lung*  
45  
46 *Dis.* 2007; 11(3):270-4.  
47  
48  
49  
50  
51 36. Jensen PA. Where should infection control programs for tuberculosis begin? *Int J Tuberc*  
52 *Lung Dis* 2005; 9:825.  
53  
54  
55  
56 37. Fu L, Tian M, Pan R, et al. Investigation on College Student' Knowledge, Confidence and  
57  
58  
59  
60

1  
2  
3  
4  
5  
6  
7  
8  
9  
10  
11  
12  
13  
14  
15  
16  
17  
18  
19  
20  
21  
22  
23  
24  
25  
26  
27  
28  
29  
30  
31  
32  
33  
34  
35  
36  
37  
38  
39  
40  
41  
42  
43  
44  
45  
46  
47  
48  
49  
50  
51  
52  
53  
54  
55  
56  
57  
58  
59  
60

Behavior about Prevention and Treatment for Tuberculosis in Chengdu. *Parasitoses and Infectious Diseases* 2008; 6(4):185-187.

For peer review only



## Tables

**Table1 Demographic characteristics of undergraduates surveyed in medical universities in southwest China (n=1486)**

| Demographic factors           | N                   | %    |      |
|-------------------------------|---------------------|------|------|
| Sex                           | Male                | 1102 | 74.2 |
|                               | Female              | 384  | 25.8 |
| Grade                         | Year 1              | 617  | 41.5 |
|                               | Year 2              | 399  | 26.9 |
|                               | Year 3              | 470  | 31.6 |
| Major                         | Clinic medicine     | 1017 | 68.4 |
|                               | Non-clinic medicine | 469  | 31.6 |
| Access to TB health education | Yes                 | 802  | 54   |
|                               | No                  | 684  | 45   |

**Table 2 Knowledge of TB signs/symptoms, transmission, and treatment among undergraduates in medical universities in Southwest China†**

| Knowledge of TB                                    | Total n(%) | Sex n (%) |            | Grade n (%) |           |            | Major n (%)       |                       |
|----------------------------------------------------|------------|-----------|------------|-------------|-----------|------------|-------------------|-----------------------|
|                                                    |            | Male      | Female     | Year 3      | Year 2    | Year 1     | Clinical medicine | Non-clinical medicine |
| <b>Students had knowledge of TB signs/symptoms</b> |            |           |            |             |           |            |                   |                       |
| Chronic cough                                      | 597(40.2)  | 501(45.5) | 96(25.0)*  | 262(42.5)   | 118(29.6) | 217(46.0)* | 399(39.2)         | 198(42.2)             |
| Haemoptysis                                        | 756(50.9)  | 608(55.2) | 148(38.5)* | 332(53.8)   | 176(44.2) | 248(52.9)* | 509(50.0)         | 247(52.8)             |
| Fever                                              | 371(25.0)  | 298(27.1) | 73(19.0)*  | 204(33.1)   | 73(18.4)  | 94(20.0)*  | 269(26.5)         | 102(21.7)             |
| Night sweats                                       | 328(22.1)  | 265(24.1) | 63(16.4)*  | 209(33.9)   | 54(13.6)  | 65(13.8)*  | 235(23.1)         | 93(19.8)              |
| Weakness                                           | 398(26.8)  | 348(31.6) | 50(13.0)*  | 212(34.4)   | 73(18.3)  | 113(24.0)* | 270(26.5)         | 128(27.3)             |
| Weight loss                                        | 318(21.4)  | 286(26.0) | 32(8.3)*   | 190(30.8)   | 43(10.8)  | 85(18.1)*  | 220(21.7)         | 98(20.9)              |
| All above TB signs/symptoms                        | 132(8.9)   | 119(10.8) | 13(3.4)*   | 84(13.6)    | 17(4.3)   | 31(6.6)*   | 88(8.7)           | 44(9.4)               |
| <b>Students had knowledge of TB transmission</b>   |            |           |            |             |           |            |                   |                       |
| TB is an infectious disease                        | 1231(82.8) | 893(81.0) | 338(88.0)* | 531(86.1)   | 316(79.4) | 384(81.5)* | 854(84.0)         | 377(80.4)             |
| Transmitted by cough                               | 414(27.9)  | 338(30.7) | 76(19.8)*  | 186(30.1)   | 92(23.1)  | 136(29.0)  | 293(28.8)         | 121(25.8)             |
| Transmitted by sneezing & talking loudly           | 841(56.6)  | 607(55.1) | 234(60.9)* | 386(62.6)   | 191(48.0) | 264(56.3)* | 597(58.8)         | 244(52.0)*            |
| <b>Students had knowledge of TB treatment</b>      |            |           |            |             |           |            |                   |                       |
| TB is a treatable disease                          | 1183(79.6) | 891(81.0) | 292(76.0)* | 477(77.3)   | 318(80.1) | 388(82.6)* | 802(79.0)         | 381(81.4)             |
| Duration of treatment                              | 439(29.5)  | 313(28.5) | 126(32.8)* | 207(33.5)   | 109(27.5) | 123(26.2)* | 304(30.0)         | 135(28.8)             |
| Aware of TB dispensary                             | 404(27.2)  | 267(24.4) | 137(35.7)* | 169(27.4)   | 108(27.1) | 127(27.0)  | 270(26.5)         | 134(28.6)             |
| Aware of free treatment policy                     | 506(34.1)  | 345(31.4) | 161(41.9)* | 197(31.9)   | 123(31.1) | 186(39.5)* | 356(35.1)         | 150(32.0)             |
| Aware of DOTS                                      | 215(14.5)  | 142(12.9) | 73(19.0)*  | 110(17.8)   | 55(13.9)  | 50(10.8)*  | 148(14.6)         | 67(14.3)              |

† $\chi^2$  test used to compare between males and females, different grades, and different majors.

\*P < 0.05

**Table 3 Factors associated with the core knowledge of TB among undergraduates in medical university in Southwest China**

| Factors                              | OR (95%CI)                                   |                              |                           |               |                |
|--------------------------------------|----------------------------------------------|------------------------------|---------------------------|---------------|----------------|
|                                      | TB symptoms of cough and blood-tinged sputum | TB as one infectious disease | TB as one curable disease | TB dispensary | TB free policy |
| <b>Gender</b>                        |                                              |                              |                           |               |                |
| Female                               | Reference                                    | Reference                    | Reference                 | Reference     | Reference      |
| Male                                 | 0.1(0.1, 0.2)                                | 1.8(1.3, 2.7)                | 0.8(0.6, 1.1)             | 1.7(1.3, 2.4) | 1.9(1.5, 2.4)  |
| <b>Grade</b>                         |                                              |                              |                           |               |                |
| Year 1                               | Reference                                    | Reference                    | Reference                 | Reference     | Reference      |
| Year 2                               | 1.6(1.5, 1.9)                                | 1.7(1.5, 1.9)                | 1.3(0.9, 1.8)             | 1.1(0.8, 1.5) | 1.6(1.2, 2.0)  |
| Year 3                               | 1.8(1.2,2.6)                                 | 1.2(0.8,1.7)                 | 1.1(0.7, 1.5)             | 1.1(0.8, 1.6) | 1.7(1.2, 2.3)  |
| <b>Major</b>                         |                                              |                              |                           |               |                |
| Clinic medicine                      | Reference                                    | Reference                    | Reference                 | Reference     | Reference      |
| Non-clinic medicine                  | 1.1(0.8, 1.4)                                | 1.7(0.5, 1.9)                | 1.2(0.9, 1.6)             | 1.1(0.8, 1.4) | 0.8(0.6, 1.1)  |
| <b>Access to TB health education</b> |                                              |                              |                           |               |                |
| Yes                                  | Reference                                    | Reference                    | Reference                 | Reference     | Reference      |
| No                                   | 0.5(0.4, 0.7)                                | 0.4(0.3, 0.5)                | 0.6(0.5, 0.7)             | 0.6(0.5, 0.8) | 0.7(0.5, 0.8)  |

## Figure legends

### **Fig. 1: The Southwestern People's Republic of China.**

In this this figure demonstrated Southwest China. The place marked with red color is Southwest China which includes the municipality of Chongqing, the provinces of Sichuan, Yunnan and Guizhou, and the Tibet Autonomous Regions.

### **Fig. 2: Knowledge of TB symptoms and transmission among undergraduate medical students in Southwest China.**

Figure 2A presents undergraduate medical students' knowledge of classical symptoms of TB; Figure 2B presents students' knowledge of means of TB transmission.

### **Fig. 3: Knowledge of TB free policy and DOTS among undergraduate medical students in Southwest China.**

Figure 3A presents undergraduate medical students' knowledge of the free TB treatment policy in China; Figure 3B presents undergraduate medical students' knowledge of the contents of the Directly Observed Therapy-Short Course (DOTS) program.

### **Fig. 4: Knowledge of core TB knowledge among undergraduate medical students in Southwest China.**

Figure 4A presents the percentage of undergraduate medical students correctly answered each question for core TB knowledge; Figure 4B presents percentage of undergraduate medical students correctly answered none, only one question, any 2, any 3, any 4 and any 5 questions for core TB knowledge.

1  
2  
3  
4 This figure presents undergraduate medical students' knowledge of core TB symptoms

5  
6 **Fig. 5: Sources of TB knowledge among undergraduate medical students in Southwest**  
7  
8 **China.**

9  
10  
11 This figure presents undergraduate medical students' major sources of information on TB.  
12  
13  
14  
15  
16  
17  
18  
19  
20  
21  
22  
23  
24  
25  
26  
27  
28  
29  
30  
31  
32  
33  
34  
35  
36  
37  
38  
39  
40  
41  
42  
43  
44  
45  
46  
47  
48  
49  
50  
51  
52  
53  
54  
55  
56  
57  
58  
59  
60

For peer review only

1  
2  
3  
4  
5  
6  
7  
8  
9  
10  
11  
12  
13  
14  
15  
16  
17  
18  
19  
20  
21  
22  
23  
24  
25  
26  
27  
28  
29  
30  
31  
32  
33  
34  
35  
36  
37  
38  
39  
40  
41  
42  
43  
44  
45  
46  
47  
48  
49  
50  
51  
52  
53  
54  
55  
56  
57  
58  
59  
60



72x59mm (300 x 300 DPI)

ew only

1  
2  
3  
4  
5  
6  
7  
8  
9  
10  
11  
12  
13  
14  
15  
16  
17  
18  
19  
20  
21  
22  
23  
24  
25  
26  
27  
28  
29  
30  
31  
32  
33  
34  
35  
36  
37  
38  
39  
40  
41  
42  
43  
44  
45  
46  
47  
48  
49  
50  
51  
52  
53  
54  
55  
56  
57  
58  
59  
60

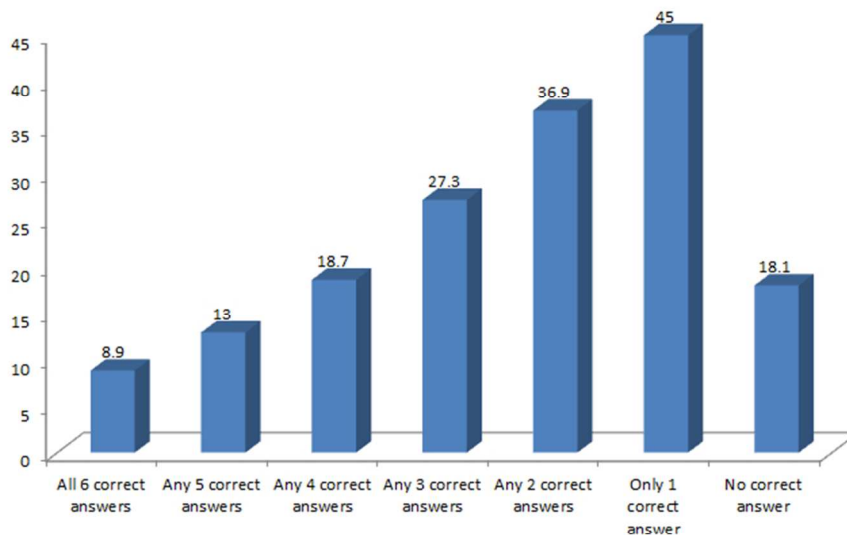

Figure2 A Percentage of correctly answered questions on knowledge about TB symptoms

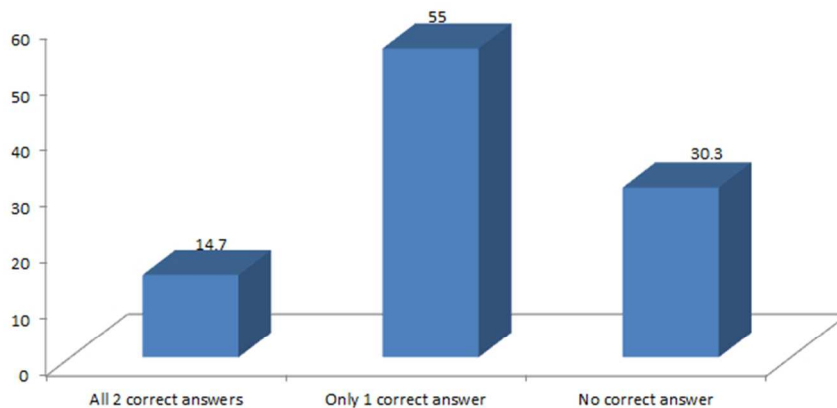

Figure2 B Percentage of correctly answered questions on knowledge about TB transmission

58x75mm (300 x 300 DPI)

1  
2  
3  
4  
5  
6  
7  
8  
9  
10  
11  
12  
13  
14  
15  
16  
17  
18  
19  
20  
21  
22  
23  
24  
25  
26  
27  
28  
29  
30  
31  
32  
33  
34  
35  
36  
37  
38  
39  
40  
41  
42  
43  
44  
45  
46  
47  
48  
49  
50  
51  
52  
53  
54  
55  
56  
57  
58  
59  
60

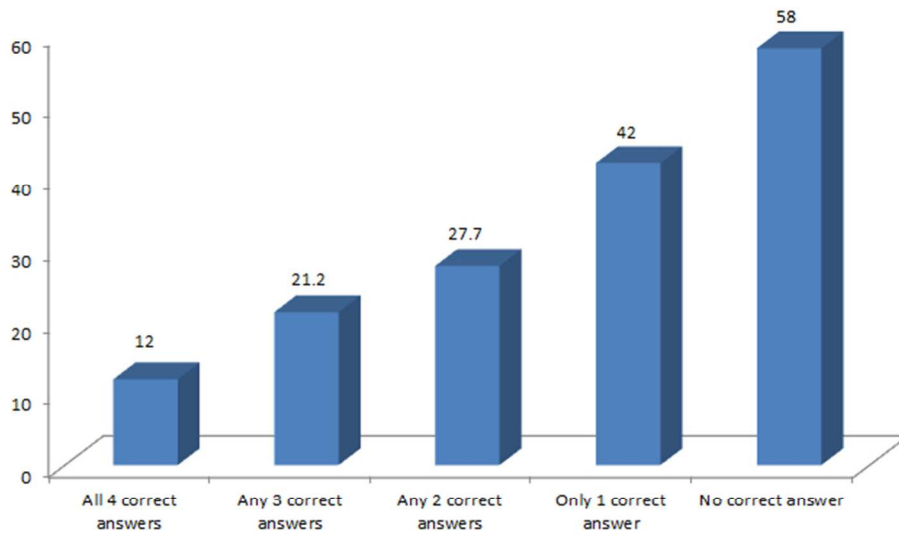

Figure3A Percentage of correctly answered questions on knowledge about TB free policy

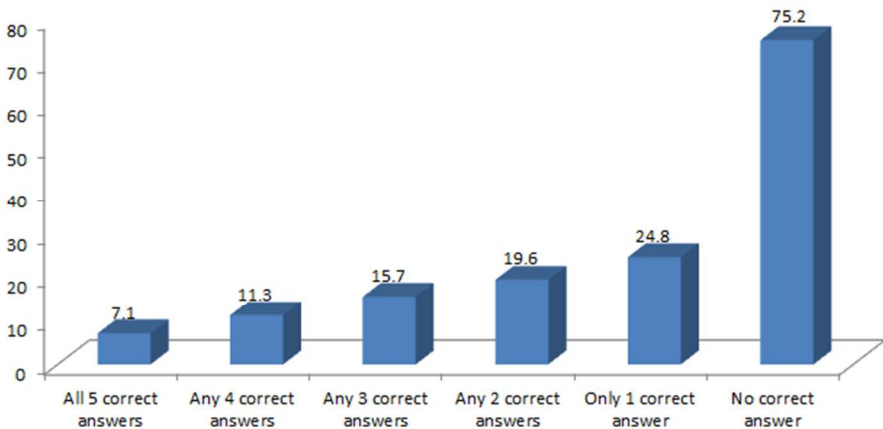

Figure3B Percentage of correctly answered questions on knowledge about DOTS

58x67mm (300 x 300 DPI)



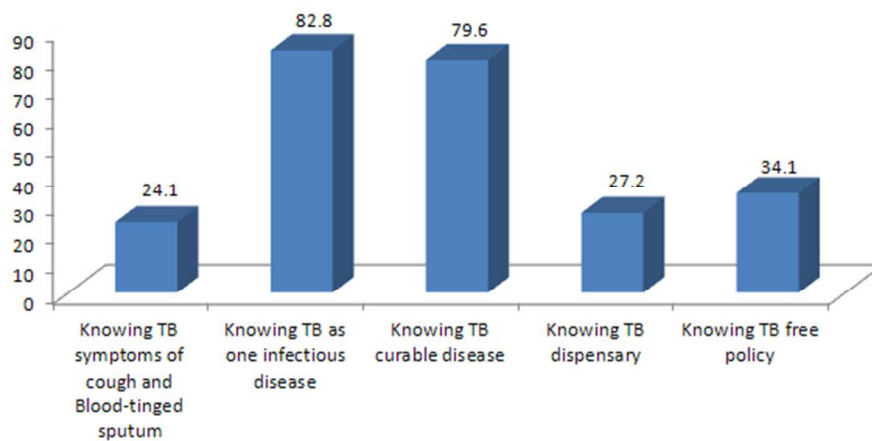

Figure 4A Percentage of correctly answered each question on TB core knowledge

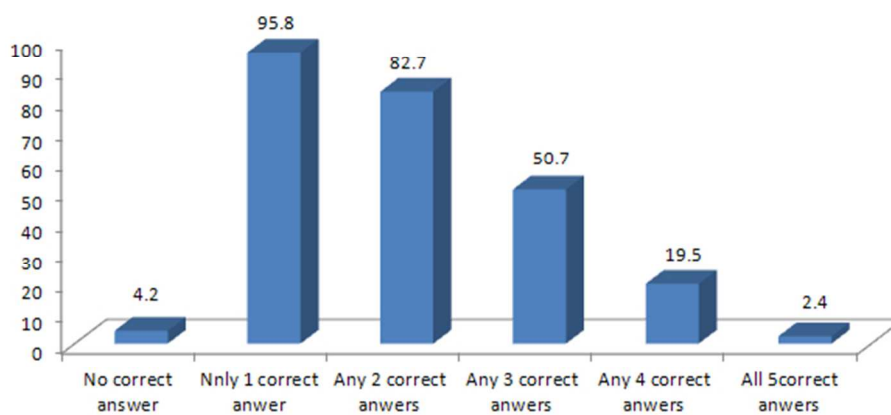

Figure 4B Percentage of correctly answered questions on TB core knowledge

54x61mm (300 x 300 DPI)

1  
2  
3  
4  
5  
6  
7  
8  
9  
10  
11  
12  
13  
14  
15  
16  
17  
18  
19  
20  
21  
22  
23  
24  
25  
26  
27  
28  
29  
30  
31  
32  
33  
34  
35  
36  
37  
38  
39  
40  
41  
42  
43  
44  
45  
46  
47  
48  
49  
50  
51  
52  
53  
54  
55  
56  
57  
58  
59  
60

1  
2  
3  
4  
5  
6  
7  
8  
9  
10  
11  
12  
13  
14  
15  
16  
17  
18  
19  
20  
21  
22  
23  
24  
25  
26  
27  
28  
29  
30  
31  
32  
33  
34  
35  
36  
37  
38  
39  
40  
41  
42  
43  
44  
45  
46  
47  
48  
49  
50  
51  
52  
53  
54  
55  
56  
57  
58  
59  
60



Figure 5 Percentage of students ranked the approach to get TB knowledge

76x35mm (300 x 300 DPI)

er review only

1  
2  
3  
4 **A survey of TB knowledge among medical students in Southwest China: Is**  
5  
6 **the information reaching the target?**  
7  
8  
9

10 Ying Zhao<sup>1a</sup>

11 John Ehiri<sup>2a</sup>

12 Daikun Li<sup>3</sup>

13 Xinglun Luo<sup>4</sup>

14 Ying Li<sup>5§</sup>

15  
16  
17  
18  
19  
20  
21  
22  
23  
24  
25  
26  
27  
28 **§ Correspondence to:** Ying Li, Department of Social Medicine and Health Service  
29 Management, Third Military Medical University, Chongqing 400038, China.  
30  
31 (E-mail: [lilyliying2012@163.com](mailto:lilyliying2012@163.com); [yingli@email.arizona.edu](mailto:yingli@email.arizona.edu))  
32  
33

34 <sup>a</sup>Ying Zhao and John Ehiri contributed equally to this work.  
35  
36  
37  
38  
39  
40  
41  
42  
43  
44  
45  
46  
47  
48  
49  
50  
51  
52  
53  
54  
55  
56  
57  
58  
59  
60

## Abstract

**Objectives:** TB control in schools is a concern in low- and middle-income countries with high TB burdens. TB knowledge is recognized as important for TB control in China, which has one of the highest TB prevalence in the world. Accordingly, National TB Control Guideline in China emphasized TB health education in schools as one of the core strategies for improving TB knowledge among the population. It was important to assess the level of TB knowledge in schools following five-year implementation of the guideline, in order to determine if the information was reaching the targets.

**Design:** A cross-sectional study.

**Methods and study setting:** This survey assessed TB knowledge and access to TB health information by questionnaire survey with 1,486 undergraduates from two medical universities in southwest China.

**Results:** Overall, the students had inadequate TB knowledge. Only 24.1%, 27.2%, and 34.1% of the students had knowledge of TB symptoms of cough/blood-tinged sputum, their local TB dispensaries, and free TB treatment policy, respectively. Very few (14.5%) had heard about the Directly Observed Therapy Short Course (DOTs), and only about half (54%) had ever accessed TB health education information. Exposure to health education messages was significantly associated with increased knowledge of the five core TB knowledge as follows: classic TB symptoms of cough/blood-tinged sputum (OR[95%CI]: 0.5[0.4, 0.7]), TB modes of transmission (OR[95%CI]: 0.4[0.3, 0.5]), curability of TB (OR[95%CI]: 0.6[0.5, 0.7]), location and services provided by TB local dispensaries (OR[95%CI]: 0.6[0.5, 0.8]), and the national free TB treatment policy (OR[95%CI]: 0.7[0.5, 0.8]).

1  
2  
3  
4 **Conclusions:** The findings pose the question of whether it is time for a rethink of the current  
5  
6 national and global approach to TB health education/promotion which favors promotion of  
7  
8 awareness on World TB Days rather than regular community sensitization efforts.  
9  
10

11  
12  
13  
14 **Key words:** *Tuberculosis knowledge; undergraduate students; TB health promotion; China;*  
15  
16  
17  
18  
19  
20  
21  
22  
23  
24  
25  
26  
27  
28  
29  
30  
31  
32  
33  
34  
35  
36  
37  
38  
39  
40  
41  
42  
43  
44  
45  
46  
47  
48  
49  
50  
51  
52  
53  
54  
55  
56  
57  
58  
59  
60

## ARTICLE SUMMARY

### Article focus:

- To describe knowledge of TB among undergraduate medical students.
- To explore factors associated with TB knowledge among undergraduate medical students.
- To attract attention to reform of school-based TB health education and promotion

### Key messages

- Overall, undergraduate medical students had inadequate TB knowledge.
- Undergraduate students had limited access to TB health education/promotion.
- A rethink of current national and global approaches to TB health education/promotion is urgently needed in the light of the current global burden of TB.

### Strengths and limitations of this study

- The main strength of the manuscript is the establishment of a baseline level of TB knowledge among undergraduate medical students. This is the first study to assess school-based TB health education/promotion in the study setting.
- The main limitation is that the study used a cross-sectional design, which did assess TB knowledge changes before and after school TB health education/promotion.

## INTRODUCTION

The 16<sup>th</sup> Global Report on Tuberculosis (TB) published by WHO in 2012 showed that the Millennium Development Goal target for halting and reversing the TB epidemic by 2015 had already been achieved, with mortality and incidence rates falling in 22 high-burden countries. Nevertheless, the global burden of TB remains untenable,<sup>1</sup> in high-burden countries such as China. Globally, TB remains the second leading cause of death from infectious diseases (after HIV/AIDS).<sup>1</sup> Globally over the past five years, there has been a marked increase in the number of TB patients diagnosed with multi-drug resistant TB (MDR-TB).<sup>1</sup> China has the world's second largest tuberculosis epidemic and has contributed significantly to this MDR-TB increase. In recent years, the country has undertaken measures to control TB, and in order to evaluate the progress of TB control in the past decade, the country launched the 5th National Sampling Survey of TB Epidemiology in 2010.<sup>2</sup> Results of the survey showed an estimated 8.28 million cases of pulmonary TB (PTB) in the country from 2001 to 2010.<sup>2</sup> In spite of concerted international and national efforts to address TB in the country, annual prevalence (per 100,000 people) declined only minimally from 466 in 2000 to 459 in 2010.<sup>2</sup> Similarly, incidence of MDR-TB among PTB cases has remained unchanged in the past decade, and resistance to first-line drugs among newly diagnosed TB patients rose from 34.2 % in 2007/2008<sup>3</sup> to 36.9% in 2010.<sup>2</sup>

Owing to lack of TB knowledge, less than half of patients with TB symptoms seek healthcare timely.<sup>2</sup> Available evidence shows that only 59% TB patients comply with treatment, and among the public, only 57% have proper TB knowledge.<sup>2</sup> Limited knowledge about signs and

1  
2  
3  
4 symptoms of TB often results in delays in TB diagnosis and treatment<sup>4</sup>, which in return,  
5  
6 increases not only the risk of TB transmission, but also the development of MDR-TB.  
7  
8  
9 China's MDR-TB prevalence rate of 6.8% is the highest in the world.<sup>2</sup>

10  
11  
12  
13  
14 TB control among undergraduate students is recognized as a concern in low- and  
15  
16 middle-income countries with high TB burdens. Undergraduate students usually live in  
17  
18 relative overcrowding conditions that are conducive to TB outbreaks.<sup>5</sup> TB outbreaks among  
19  
20 students have been reported even in such low-burden countries as the UK, Italy, Ireland, and  
21  
22 the USA.<sup>6-10</sup> Chinese undergraduate students are recognized as a particularly vulnerable  
23  
24 population for TB. The TB prevalence (per 100,000) among Chinese students has been  
25  
26 reported to be as high as 1,520, which is significantly higher than the prevalence (459) for the  
27  
28 general population.<sup>11</sup> Chongqing, Guizhou, and Shanxi provinces were the three provinces  
29  
30 with the highest TB burden among undergraduate students between 2005 and 2008.<sup>12</sup> In  
31  
32 addition, several TB outbreaks among undergraduate students were recently reported in  
33  
34 Chongqing, Liangning, Zhejiang, Shangdong, and Guizhou, with the incidence rates ranging  
35  
36 from 620 to 31,370 per 100,000.<sup>11-17</sup>

37  
38  
39  
40  
41  
42  
43  
44  
45  
46 Medical students in university can expose to TB infection during clinic rotations.<sup>18</sup> Thus,  
47  
48 adequate knowledge of TB epidemiology and control is critically important for this population.

49  
50  
51 Knowledge of TB among medical undergraduates in university is also important since they  
52  
53 represent potential future physicians or leaders in the fight against TB.<sup>19</sup> In ~~1998~~1997, WHO  
54  
55 released a [reportdocument](#) ~~in 1997~~ following a workshop on Tuberculosis Control and  
56  
57  
58  
59  
60



1  
2  
3  
4 Medical Schools held in Rome, Italy, which stressed the importance of graduating medical  
5  
6 students with proper knowledge and skills related to effective TB control.<sup>20</sup> WHO later  
7  
8 released a manual that aims to inform medical students and medical practitioners about best  
9  
10 practices in managing TB patients.<sup>21</sup> Several studies have documented inadequate TB  
11  
12 knowledge and poor compliance with TB treatment guidelines among practicing  
13  
14 physicians.<sup>22-24</sup> In countries where TB (including MDR-TB) presents significant challenges to  
15  
16 public health, equipping emerging physicians with in-depth TB knowledge is of critical  
17  
18 importance in the overall efforts to reduce the burden of the disease. In China, school TB  
19  
20 health promotion was emphasized in the 2008 National Guideline for TB Control.<sup>25</sup> It was  
21  
22 important to assess the level of TB knowledge in schools following five-year implementation  
23  
24 of the guideline. This survey assessed TB knowledge and access to TB health information  
25  
26 among 1,486 pre-clinical undergraduate students from two medical universities in southwest  
27  
28 China which has one of the highest TB burdens of in the country. It was hoped that the  
29  
30 findings could help to identify whether the information was reaching the targets, and thus  
31  
32 engender efforts to strengthen TB school education in the region and similar locales in low  
33  
34 and middle income countries with high TB burden.  
35  
36  
37  
38  
39  
40  
41  
42  
43  
44  
45

## 46 **METHODS**

### 47 **Study setting**

48  
49 The study setting, Southwest China, includes Chongqing Municipality, the provinces of  
50  
51 Sichuan, Yunnan, Guizhou, and Tibet Autonomous Region (Figure 1) where prevalence rates  
52  
53 (cases per 100,000) of active TB (695), smear positive TB (105), and culture positive TB  
54  
55  
56  
57  
58  
59  
60

1  
2  
3  
4 (198) are much higher than the national prevalence rates of 459, 66, and 119, respectively.<sup>2</sup>  
5

6 Southwest China has a population of more than 19 million which represent more than 10% of  
7  
8 China's population of 1.3 billion people.  
9

## 10 11 12 13 **Participants**

14  
15  
16 There were 10 medical universities in Southwest China. These universities offer 5-year  
17  
18 majors in clinical medicine, public health, pharmacy, medical laboratory, Chinese medicine,  
19  
20 and nursing. We randomly selected two of the 10 universities and restricted our sample frame  
21  
22 to pre-clinical students (students who have not received clinic curriculum) in their first to  
23  
24 third years of training. We excluded fourth- and fifth-year students since they might have  
25  
26 obtained TB knowledge from their clinical training as part of their clinical curriculum rather  
27  
28 than from government school TB health education. The survey was conducted between  
29  
30 November 2011 and May 2012 and focused on the assessment of TB knowledge among the  
31  
32 respondents. The sample frame consisted of 20,000 eligible students. To obtain a power of  
33  
34 80% and a confidence level of 95%, we calculated the study sample to be 1536.<sup>26</sup> During  
35  
36 recruitment, potential participants were approached and provided with detailed explanation of  
37  
38 the study and its objectives. They were then asked if they would be interested in volunteering  
39  
40 to participate. Those who expressed interest were asked to read the informed consent form,  
41  
42 and were assured of confidentiality. They were then asked to sign the informed consent form  
43  
44 as a conformation of their voluntary participation in the study. Approval for the study was  
45  
46 obtained from the Institutional Review Boards of the College of Preventive Medicine, Third  
47  
48 Military Medical University, Chongqing, China (October, 20, 2011) and the School of  
49  
50  
51  
52  
53  
54  
55  
56  
57  
58  
59  
60

1  
2  
3  
4 Nursing, Chengdu University of Traditional Chinese Medicine, Chengdu, Sichuan Province,  
5  
6 China (28 April, 2012).  
7  
8  
9

### 10 11 **Questionnaire**

12  
13 The survey was cross-sectional in design. Following participant enrollment in the study, data  
14  
15 were collected by means of a self-administered questionnaire that assessed participants'  
16  
17 knowledge about TB signs/symptoms, transmission, management, and control. Data were  
18  
19 elicited on the following variables: socio-demographic profile (age, sex), degree major  
20  
21 (clinical and non-clinical), year in the medical program, TB knowledge (symptoms, mode of  
22  
23 transmission, treatment, knowledge of TB control facilities in the study setting, local TB  
24  
25 control policies and program), and core knowledge of TB, namely, five core TB knowledge  
26  
27 areas which include: (i) classic TB symptoms of cough/blood-tinged sputum, (ii) TB modes  
28  
29 of transmission, (iii) curability of TB, (iv) location and services provided by TB local  
30  
31 dispensaries, and (v) the national free TB treatment policy.  
32  
33  
34  
35  
36  
37  
38  
39  
40

### 41 **Data analysis**

42  
43 Epi-data 6.0 was used for data entry. Data analyses were conducted using the Statistical  
44  
45 Package for Social Sciences version 18.0. To assess TB knowledge among the participants,  
46  
47 we calculated the percentage of people who provided correct responses to questions about the  
48  
49 6 symptoms of TB, 3 ways of transmitting TB, 5 items related to TB treatment, and 5 core  
50  
51 knowledge of TB. We used chi-square statistics ( $\chi^2$ ) to assess participants' responses by  
52  
53 gender, year in medical school, and degree major. A binary logistic regression model which  
54  
55  
56  
57  
58  
59  
60

1  
2  
3  
4 included variables with statistical significance on the  $\chi^2$  test, were used to examine factors  
5  
6 associated with core knowledge of TB among the respondents. We used a two-tailed  
7  
8 probability level of  $<0.05$  as the level of statistical significance.  
9  
10

## 11 12 13 14 RESULTS

### 15 16 17 18 19 Demographic characteristics of participants

20  
21 A total of 1,486 undergraduate medical students participated in the survey. Of these, 617 were  
22  
23 in their first year medical training, 399 in the second year, and 470 in the third year. A  
24  
25 majority of the respondents (74.2%; n=1102) were male, and 68.4% students were majoring  
26  
27 in clinical medicine. Only 54% of the students indicated having access to some kind of TB  
28  
29 health information (Table 1).  
30  
31  
32  
33  
34  
35

### 36 37 38 39 Knowledge of TB symptoms

40  
41 The respondents' knowledge of symptoms is shown in Table 2. About 18% (n=261) had no  
42  
43 knowledge of any TB symptoms, and less than 10% (n=132) were able to identify all TB  
44  
45 symptoms (Figure 2 A). As for overall knowledge of TB symptoms, 10.8% (n=119) of males  
46  
47 and 3.4% (n=13) of female ~~3.4% (13) year~~ had knowledge of all of these classic symptoms of  
48  
49 TB (p $\leq$ 0.05), ~~).~~ Slightly more than thirteen per cent (~~;~~ 13.6%; n=(84) of students in the third  
50  
51 year of medical school, ~~,~~ 4.3 % (17), 6.6% (31) students of third year, 4.3 % (n=17) of those  
52  
53 in the second year, ~~,~~ second year and 6.6% (n=31) of first-year students had knowledge of all  
54  
55 of these classic symptoms (p $\leq$ 0.05). There were no statistically significant differences in  
56  
57  
58  
59  
60

1  
2  
3  
4 knowledge of TB symptoms between students in clinical and non-clinical degree majors

5  
6 (p>0.05) (Table 2).  
7  
8  
9

### 10 11 **Knowledge about TB transmission**

12  
13 Only 27.9% (n=414) of the respondents were aware that TB could be transmitted through  
14 exposure to droplet nuclei from the cough of an infected person (Table 2), and only 14.7%  
15 (n=218) knew the two main routes of TB transmission (Figure 2B). Overall, more females  
16 (88%; n=338) and third-year students (86.1%; n=531) knew the transmission routes of TB  
17  
18  
19  
20  
21 (p<0.05).  
22  
23  
24  
25  
26  
27  
28

### 29 **Knowledge about TB treatment and policies**

30  
31 Although 80% of the students knew that TB was curable, only 30% (n=446) knew the  
32 duration of TB treatment. Only 27.2% (n=404) knew TB control facilities (TB dispensaries);  
33  
34 34% and 14.5% had heard of the national free TB treatment policy and DOTS, respectively  
35  
36  
37 (Table 2). A greater proportion of female than male respondents had better knowledge  
38  
39 about the duration of TB treatment, TB control facilities, free TB treatment policy, and  
40  
41 DOTS (P≤0.05). Overall, third-year students had better knowledge of TB treatment except  
42  
43 for knowledge on TB as a curable disease and free treatment policy. There were no  
44  
45 significant differences between students in clinical and non-clinical majors (Table 2). Only  
46  
47 12% (n=178) of the respondents knew all the 4 items included in the free TB treatment  
48  
49 policy (registration, sputum test, chest X-rays, and anti-TB drugs) (Figure 3A). Less than  
50  
51 10% (n=106) of the students were familiar with all 5 items of DOTS (Figure 3B).  
52  
53  
54  
55  
56  
57  
58  
59  
60

### Core knowledge of TB

With regard to core knowledge of TB, less than half students had knowledge of TB symptoms of cough/blood-tinged sputum, their local TB dispensaries, and the national free TB treatment policy (Figure 4A). Only 2.4% were familiar with all five core TB knowledge areas (Figure 4B). Multiple logistic regression analysis indicated that access to health education was associated with the five core TB knowledge: (OR [95%CI]: 0.5[0.4, 0.7]) for classic TB symptoms of cough/blood-tinged sputum, (OR [95%CI]: 0.4[0.3, 0.5]) for means of TB transmission, (OR [95%CI]: 0.6[0.5, 0.7]) for curability of TB, (OR [95%CI]: 0.6[0.5, 0.8]) for TB dispensaries, and (OR [95%CI]: 0.7[0.5, 0.8]) for the national free TB treatment policy. Males had poor knowledge related to transmission of TB, TB dispensaries and free TB treatment policy (OR [95%CI]: 1.8[1.3, 2.7], 1.7[1.3, 2.4], 1.9[1.5, 2.4]), respectively. Third year students had better knowledge of TB compared with students in the first and second years (Table 3).

### Sources of TB Knowledge

With regard to how the respondents gained awareness and understanding of TB, survey results indicated that the most frequent source of information was textbooks, the second was the Internet, and the third was the media (newspaper and billboards) (Figure 5).

## DISCUSSION

TB is still one of the most important global public health threats. If global control of the disease does not improve, the annual global incidence is expected to increase from the current

1  
2  
3 21% to 61% by 2020.<sup>27</sup> Early detection and adequate treatment are critical control measures.

4  
5  
6 In spite of the fact that China carries one of the highest TB burdens in the world, lack of  
7  
8 knowledge about the disease remains an abiding problem in the country, and thus, presents a  
9  
10 barrier to control efforts.<sup>2</sup>

11  
12  
13  
14  
15  
16 Medical students are China's future health professionals and clinical leaders. Thus,  
17  
18 understanding their level of awareness about TB is important. Unfortunately, this survey  
19  
20 revealed that these students had generally poor knowledge of TB. Surveys conducted in other  
21  
22 countries have reported inadequate knowledge of TB among medical professions students. In  
23  
24 Turkey for example,<sup>28</sup> a study of 828 fourth-year medical students found that they lacked  
25  
26 skills in interpreting radiology and smears even in their last year of medical school. One  
27  
28 study in Brazil found that although medical students had had good knowledge of biosafety  
29  
30 norms, they engaged in risky behaviors in health care settings where TB patients were  
31  
32 assisted.<sup>29</sup> Similarly, a study in the United States reported that, prior to implementation of the  
33  
34 National Tuberculosis Curriculum Consortium (NTCC) in U.S. medical schools, about  
35  
36 one-third of medical students did not know the method for administering tuberculin skin test  
37  
38 or that the BCG vaccine was not a contraindication for TB skin testing.<sup>30</sup>

39  
40  
41  
42  
43  
44  
45  
46  
47  
48  
49 The 2008 National Guideline for TB Control in China emphasizes five items of core  
50  
51 knowledge of TB.<sup>25</sup> In the present study, it is of particular concern that the students scored  
52  
53 very low in the TB core knowledge domain. The average knowledge base for all of the 5 core  
54  
55 knowledge domains was only 2.4%, which was lower than the score (43.45%) reported in a  
56  
57  
58  
59  
60

1  
2  
3 previous study in China's Hunan province.<sup>31</sup> We also found that only 24.1% knew the classic  
4 symptoms of TB (cough and blood stained sputum), which was similar to the report in  
5  
6 Nanjing, China where only 26.3% students were familiar with TB symptoms.<sup>32</sup> This study  
7  
8 observed that less than 30% of the respondents knew the course of TB treatment and were  
9  
10 aware of TB control facilities in Southwest China which was lower than the rate observed in  
11  
12 a previous study (36.66%).<sup>32</sup> We found that only 30% knew the free TB treatment policy in  
13  
14 China, which was similar to that reported in a related study.<sup>33</sup> One-third of our respondents  
15  
16 could not identify a mode of transmission for TB. A survey of final year medical students in  
17  
18 China's Hunan province in 2000 concluded that knowledge and practical competencies  
19  
20 regarding TB among final-year medical students were generally inadequate.<sup>34</sup> Results of our  
21  
22 current study showed that the situation has not improved in the past 13 years.  
23  
24  
25  
26  
27  
28  
29  
30  
31  
32

33  
34 TB education has been widely recognized as an effective way to promote TB knowledge  
35  
36 among students. In 2003, the U.S. National Institutes of Health (NIH) perceived a need to  
37  
38 strengthen the teaching of TB to health-profession students, and funded the National  
39  
40 Tuberculosis Curriculum Consortium (NTCC) to help address this need.<sup>30</sup> Evidence shows  
41  
42 that this has contributed to marked improvement in TB knowledge among students,  
43  
44 nationally.<sup>30, 35-36</sup> Strong recommendations to strengthen TB knowledge of medical and other  
45  
46 health-professions students through education have also been made by other countries.<sup>37</sup>  
47  
48

49  
50 Although the National Guideline for TB Control in China emphasizes TB health education  
51  
52 and promotion for the public, TB patients, and students, TB health education and promotion  
53  
54 in universities remain sub-optimal.<sup>25</sup> Findings from many studies have shown that  
55  
56  
57  
58  
59  
60



1  
2  
3  
4 40%-63.7% of students reported “hearing from others” as their primary source of information  
5  
6 about TB.<sup>32,37</sup> This study also found that only 54% students had ever received TB health  
7  
8 education. Accessing TB health education was significantly associated with core knowledge  
9  
10 of TB. Given that non-clinical students have less opportunity to learn about TB as part of  
11  
12 their regular curriculum, school TB health education should be seen as a primary source of  
13  
14 information on TB for them.  
15  
16  
17  
18  
19  
20

## 21 **CONCLUSION**

22  
23  
24  
25  
26 In countries with high TB burden, it is important that all opportunities to raise population  
27  
28 awareness about the disease are used to the optimum. In line with the WHO settings approach  
29  
30 to health promotion,<sup>20</sup> schools should be seen as important avenues for TB health education  
31  
32 given the multiplier effect of such intervention is likely to have on the students, their families,  
33  
34 communities and others in their social networks.<sup>20</sup> Unfortunately, there is the tendency to  
35  
36 focus promotion of TB awareness on national/global TB Control Days to the neglect of a  
37  
38 plethora of opportunities for ongoing promotion in diverse settings. The overall poor  
39  
40 knowledge of TB among medical demonstrated by this study supports the need to increase  
41  
42 school TB health promotion, especially in the light of recent outbreaks of TB in universities  
43  
44 in Southwest China.<sup>13,17</sup> Given the high burden of TB in southwest China, especially in rural  
45  
46 provinces, TB health promotion in schools should be strengthened on an ongoing basis and in  
47  
48 coordination with local TB control departments and district-level Centers for Disease Control  
49  
50 and Prevention (CDC). There is a need for targeted efforts to educate students about TB since  
51  
52  
53  
54  
55  
56  
57  
58  
59  
60

1  
2  
3  
4 the students can be a major source of information to rural dwellers, including their own  
5  
6 families and others in their circles of influence.  
7  
8

### 9 **Author affiliations**

10  
11 <sup>1</sup>School of Nursing, Chengdu University of Traditional Chinese Medicine, Chengdu, Sichuan  
12  
13 Province, China.  
14  
15

16  
17 <sup>2</sup> Division of Health Promotion Sciences & The Global Health Institute, Mel & Enid  
18  
19 Zuckerman College of Public Health, , University of Arizona, Tucson, AZ, USA.  
20  
21

22  
23 <sup>3</sup>Department of Laboratory Medicine, University-Town Hospital of Chongqing University of  
24  
25 Medical Sciences, No. 55 Daxuecheng Road, Shapingba District, Chongqing, China.  
26

27  
28 <sup>4</sup>Department of TB control, Center of Disease Control in Shapingba District, Chongqing, PR  
29  
30 China.  
31

32  
33 <sup>5</sup>Department of Social Medicine and Health Service Management, Third Military Medical  
34  
35 University, No.30 Gaotanyan Road, Shapingba District, Chongqing, China.  
36

37  
38 **Contributors** YL designed this survey, JE guided the questionnaire design and data  
39  
40 collection, YZ, DL and XL collected data, DL managed data, YZ analyzed data. YZ and YL  
41  
42 drafted the manuscript; JE edited the manuscript. All authors interpreted the results, revised  
43  
44 the report and approved the final version.  
45  
46

47  
48 **Funding:** the present study was funded by National Natural Science Foundation of China  
49  
50 (Award #: 81001297)  
51  
52

53  
54 **Competing interests** None.  
55

56  
57 **Ethics approval** The ethics committees of the two study universities approved the study  
58  
59  
60

1  
2  
3  
4 protocol prior to its implementation.

5  
6 **Data sharing statement** No additional data are available.

7  
8 **References**

- 9  
10  
11 1. World Health Organization, 2012. Global Tuberculosis report.  
12  
13 [http://apps.who.int/iris/bitstream/10665/75938/1/9789241564502\\_eng.pdf](http://apps.who.int/iris/bitstream/10665/75938/1/9789241564502_eng.pdf)  
14  
15  
16 2. Wang Y. Report of the fifth national sampling survey of TB epidemiology. Beijing:  
17  
18 Military Medical Science Press. 2011;1-7.  
19  
20  
21 3. Zhao Y, Xu S, Wang L, et al. National survey of drug-resistant tuberculosis in China. *N*  
22  
23 *Engl J Med* 2012; 366:2161–2170  
24  
25  
26 4. Li Y, Ehiri J, Tang S, et al. Factors associated with patient, and diagnostic delays in  
27  
28 Chinese TB patients: a systematic review and meta-analysis. *BMC Med.* 2013;11(1):156.  
29  
30  
31 5. Barbara V. *Epidemiology in Health Care* (3rd Edition). NJ: Prentice Hall;1998  
32  
33  
34 6. The Lodi Tuberculosis Working Group. A school- and community-based outbreak of  
35  
36 *Mycobacterium tuberculosis* in northern Italy, 1992-3. *Epidemiol Infect* 1994; 113:  
37  
38 83-93.  
39  
40  
41 7. Ridzon R, Kent JH, Valway S, et al. Outbreak of drug-resistant tuberculosis with  
42  
43 second-generation transmission in a high school in California. *J Pediatr* 1997; 131:  
44  
45 863-868.  
46  
47  
48 8. Hoge CW, Fisher L, Donnell HD Jr, et al. Risk factors for transmission of *Mycobacterium*  
49  
50 *tuberculosis* in a primary school outbreak: lack of racial difference in susceptibility to  
51  
52 infection. *Am J Epidemiol* 1994; 139: 520-530.  
53  
54  
55  
56  
57  
58  
59  
60

- 1  
2  
3  
4 9. Quigley C. Investigation of tuberculosis in an adolescent. The Outbreak Control Team.  
5  
6 *Common Dis Rep CDR Revl* 1997; 7: R113-R116.  
7
- 8  
9 10. Shannon A, Kelly P, Lucey M, et al. Isoniazid resistant tuberculosis in a school outbreak:  
10  
11 the protective effect of BCG. *Eur Respir J* 1991; 4: 778-782.  
12
- 13  
14 11. Wang H, Pan JP, Zhang TH, et al. Survey on the knowledge, attitude and behaviors of TB  
15  
16 among college students. *Chinese Journal of Public health* 2006; 22( 6): 661-662.  
17
- 18  
19 12. Du X, Chen W, Huang F. Analysis on TB of national report of students TB during  
20  
21 2004-2008. *Chinese health education* 2009; 25(11):803-805.  
22
- 23  
24 13. Zhou S, Chen M. Epidemiology survey on outbreaks of TB in the universities in  
25  
26 Chongqing. *Health Medicine Research and Practice in Higher Institutions*  
27  
28 2005;2(2):7-10.  
29
- 30  
31 14. Bi HY, Meng W, Liu DS. Epidemiology survey on outbreaks of TB in universities in  
32  
33 Dandong city. *Chinese journal of health laboratory technology* 2005; 15(11):1377  
34
- 35  
36 15. Wu M, Luo J, Lu M, et al. Epidemiology survey on outbreak of TB in university in  
37  
38 Hangzhou city. *Journal of medical research* 2006; 35(6): 61-63.  
39
- 40  
41 16. Lu QQ, Ju YX, Li YY. Survey on outbreak of TB in university. *Chinese journal of school*  
42  
43 *health* 2007; 28(12): 1147.  
44
- 45  
46 17. Lan MB, Yu YL: Zhang HW. Epidemiology survey on outbreak of TB in university in  
47  
48 Guizhou province. *Chinese modern doctor* 2009; 47(29):102-103.  
49
- 50  
51 18. Silva VM, Cunha AJ, Kritski AL. Tuberculin skin test conversion among medical  
52  
53 students at a teaching hospital in Rio de Janeiro, Brazil. *Infect Control Hosp Epidemiol*  
54  
55 2002; 23:591–594.  
56  
57  
58  
59  
60

- 1  
2  
3  
4 19. Mehta D, Bassi R, Singh M, et al. To study the knowledge about tuberculosis  
5  
6 management and national tuberculosis program among medical students and aspiring  
7  
8 doctors in a high tubercular endemic country. *Ann Trop Med Public Health* 2012; 5:206-8.  
9  
10  
11 20. WHO. Tuberculosis control and medical schools. Report of a WHO Workshop, Rome,  
12  
13 Italy 29-31 October 1997. [http://whqlibdoc.who.int/hq/1998/WHO\\_TB\\_98.236.pdf](http://whqlibdoc.who.int/hq/1998/WHO_TB_98.236.pdf)  
14  
15  
16 21. Nadia AK, Donald A E. Tuberculosis. A manual for medical students. World Health  
17  
18 Organization 2005, WHO/CDS/TB/99.272.  
19  
20  
21 22. Arif K, Ali SA, Amanullah S. Physician compliance with national tuberculosis treatment  
22  
23 guidelines: A university hospital study. *Int J Tuberc Lung Dis* 1997; 2:2225-30.  
24  
25  
26 23. LoBue PA, Moser K, Catanzaro A. Management of tuberculosis in San Diego County: A  
27  
28 survey of physicians' knowledge, attitudes and practices. *Int J Tuberc Lung Dis* 2001;  
29  
30 5:933-8.  
31  
32  
33 24. Khan JA, Zahid S, Khan R, et al. Medical interns' knowledge of TB in Pakistan. *Trop*  
34  
35 *Doct* 2005; 35:144-7.  
36  
37  
38 25. Center for Disease Control in China, 2008. The operational guideline for Tuberculosis  
39  
40 control program in China, 2008. Beijing: Ministry of Health. 101-105.  
41  
42  
43 26. Braden CR. Infectiousness of a university student with laryngeal and cavitary tuberculosis.  
44  
45 Investigative team. *Clin Infect Dis*. 1995; 21: 565-70.  
46  
47  
48 27. Dye C, Garnett GP, Sleeman K, et al. Prospects for worldwide tuberculosis control under  
49  
50 the WHODOTS strategy. *Lancet* 1998; 352:1886-91.  
51  
52  
53 28. Kilicaslan Z, Kiyan E, Erkan F, et al. Evaluation of undergraduate training on  
54  
55 tuberculosis at Istanbul Medical School. *Int J Tuberc Lung Dis* 2003; 7:159-164.  
56  
57  
58  
59  
60

- 1  
2  
3  
4 29. Teixeira EG, Menzies D, Cunha AJ, et al. Knowledge and practices of medical students to  
5 prevent tuberculosis transmission in Rio de Janeiro, Brazil. *Rev Panam Salud Publica*.  
6  
7 2008; 24(4):265-70.  
8  
9  
10  
11 30. Jackson M, Harrity S, Hoffman H, Catanzaro A. A survey of health-profession students for  
12 knowledge, attitudes, and confidence about tuberculosis, 2005. *BMC Public Health* 2007;  
13 7:219.  
14  
15  
16  
17 31. Feng SD, Yang SQ, Ling HY. Investigation on knowledge, attitude and behavior  
18 regarding tuberculosis in university students in Hengyan City. *Chin J School Doctor* 2011;  
19 25(11):815-817.  
20  
21  
22  
23  
24  
25  
26 32. Zhang Z, Zhang XN, Cao SY, et al. Cognition of tuberculosis related knowledge and  
27 attitude among college students in Nanjing. *Chin J Sch Health* 2012;33 (3): 263-264.  
28  
29  
30  
31 33. Yan HY. Survey on the knowledge, attitude and behaviors related to TB among  
32 undergraduate students in universities. *Chin J Sch Health* 2009; 30(7):639.  
33  
34  
35  
36 34. Bai LQ, Ziao SY, Xie HW, et al. Knowledge and practice regarding tuberculosis among  
37 final-year medical students in Hunan, China. *Zhonghua Jie He He Hu Xi Za Zhi* 2003;  
38 26(8):458-461.  
39  
40  
41  
42  
43 35. Harrity S, Jackson M, Hoffman H, et al. The National Tuberculosis Curriculum  
44 Consortium: a model of multi-disciplinary educational collaboration. *Int J Tuberc Lung*  
45 *Dis*. 2007; 11(3):270-4.  
46  
47  
48  
49  
50  
51 36. Jensen PA. Where should infection control programs for tuberculosis begin? *Int J Tuberc*  
52 *Lung Dis* 2005; 9:825.  
53  
54  
55  
56 37. Fu L, Tian M, Pan R, et al. Investigation on College Student' Knowledge, Confidence and  
57  
58  
59  
60

1  
2  
3 Behavior about Prevention and Treatment for Tuberculosis in Chengdu. *Parasitoses and*  
4  
5  
6 *Infectious Diseases* 2008; 6(4):185-187.  
7  
8  
9  
10  
11  
12  
13  
14  
15  
16  
17  
18  
19  
20  
21  
22  
23  
24  
25  
26  
27  
28  
29  
30  
31  
32  
33  
34  
35  
36  
37  
38  
39  
40  
41  
42  
43  
44  
45  
46  
47  
48  
49  
50  
51  
52  
53  
54  
55  
56  
57  
58  
59  
60

For peer review only

## Tables

**Table1 Demographic characteristics of undergraduates surveyed in medical universities in southwest China (n=1486)**

| Demographic factors           | N                   | %    |      |
|-------------------------------|---------------------|------|------|
| Sex                           | Male                | 1102 | 74.2 |
|                               | Female              | 384  | 25.8 |
| Grade                         | Year 1              | 617  | 41.5 |
|                               | Year 2              | 399  | 26.9 |
|                               | Year 3              | 470  | 31.6 |
| Major                         | Clinic medicine     | 1017 | 68.4 |
|                               | Non-clinic medicine | 469  | 31.6 |
| Access to TB health education | Yes                 | 802  | 54   |
|                               | No                  | 684  | 45   |



**Table 2 Knowledge of TB signs/symptoms, transmission, and treatment among undergraduates in medical universities in Southwest China†**

| Knowledge of TB                                    | Total n(%) | Sex n (%) |            | Grade n (%) |           |            | Major n (%)       |                       |
|----------------------------------------------------|------------|-----------|------------|-------------|-----------|------------|-------------------|-----------------------|
|                                                    |            | Male      | Female     | Year 3      | Year 2    | Year 1     | Clinical medicine | Non-clinical medicine |
| <b>Students had knowledge of TB signs/symptoms</b> |            |           |            |             |           |            |                   |                       |
| Chronic cough                                      | 597(40.2)  | 501(45.5) | 96(25.0)*  | 262(42.5)   | 118(29.6) | 217(46.0)* | 399(39.2)         | 198(42.2)             |
| Haemoptysis                                        | 756(50.9)  | 608(55.2) | 148(38.5)* | 332(53.8)   | 176(44.2) | 248(52.9)* | 509(50.0)         | 247(52.8)             |
| Fever                                              | 371(25.0)  | 298(27.1) | 73(19.0)*  | 204(33.1)   | 73(18.4)  | 94(20.0)*  | 269(26.5)         | 102(21.7)             |
| Night sweats                                       | 328(22.1)  | 265(24.1) | 63(16.4)*  | 209(33.9)   | 54(13.6)  | 65(13.8)*  | 235(23.1)         | 93(19.8)              |
| Weakness                                           | 398(26.8)  | 348(31.6) | 50(13.0)*  | 212(34.4)   | 73(18.3)  | 113(24.0)* | 270(26.5)         | 128(27.3)             |
| Weight loss                                        | 318(21.4)  | 286(26.0) | 32(8.3)*   | 190(30.8)   | 43(10.8)  | 85(18.1)*  | 220(21.7)         | 98(20.9)              |
| All above TB signs/symptoms                        | 132(8.9)   | 119(10.8) | 13(3.4)*   | 84(13.6)    | 17(4.3)   | 31(6.6)*   | 88(8.7)           | 44(9.4)               |
| <b>Students had knowledge of TB transmission</b>   |            |           |            |             |           |            |                   |                       |
| TB is an infectious disease                        | 1231(82.8) | 893(81.0) | 338(88.0)* | 531(86.1)   | 316(79.4) | 384(81.5)* | 854(84.0)         | 377(80.4)             |
| Transmitted by cough                               | 414(27.9)  | 338(30.7) | 76(19.8)*  | 186(30.1)   | 92(23.1)  | 136(29.0)  | 293(28.8)         | 121(25.8)             |
| Transmitted by sneezing & talking loudly           | 841(56.6)  | 607(55.1) | 234(60.9)* | 386(62.6)   | 191(48.0) | 264(56.3)* | 597(58.8)         | 244(52.0)*            |
| <b>Students had knowledge of TB treatment</b>      |            |           |            |             |           |            |                   |                       |
| TB is a treatable disease                          | 1183(79.6) | 891(81.0) | 292(76.0)* | 477(77.3)   | 318(80.1) | 388(82.6)* | 802(79.0)         | 381(81.4)             |
| Duration of treatment                              | 439(29.5)  | 313(28.5) | 126(32.8)* | 207(33.5)   | 109(27.5) | 123(26.2)* | 304(30.0)         | 135(28.8)             |
| Aware of TB dispensary                             | 404(27.2)  | 267(24.4) | 137(35.7)* | 169(27.4)   | 108(27.1) | 127(27.0)  | 270(26.5)         | 134(28.6)             |
| Aware of free treatment policy                     | 506(34.1)  | 345(31.4) | 161(41.9)* | 197(31.9)   | 123(31.1) | 186(39.5)* | 356(35.1)         | 150(32.0)             |
| Aware of DOTS                                      | 215(14.5)  | 142(12.9) | 73(19.0)*  | 110(17.8)   | 55(13.9)  | 50(10.8)*  | 148(14.6)         | 67(14.3)              |

† $\chi^2$  test used to compare between males and females, different grades, and different majors.

\*P < 0.05

**Table 3 Factors associated with the core knowledge of TB among undergraduates in medical university in Southwest China**

| Factors                              | OR (95%CI)                                   |                              |                           |               |                |
|--------------------------------------|----------------------------------------------|------------------------------|---------------------------|---------------|----------------|
|                                      | TB symptoms of cough and blood-tinged sputum | TB as one infectious disease | TB as one curable disease | TB dispensary | TB free policy |
| <b>Gender</b>                        |                                              |                              |                           |               |                |
| Female                               | Reference                                    | Reference                    | Reference                 | Reference     | Reference      |
| Male                                 | 0.1(0.1, 0.2)                                | 1.8(1.3, 2.7)                | 0.8(0.6, 1.1)             | 1.7(1.3, 2.4) | 1.9(1.5, 2.4)  |
| <b>Grade</b>                         |                                              |                              |                           |               |                |
| Year 1                               | Reference                                    | Reference                    | Reference                 | Reference     | Reference      |
| Year 2                               | 1.6(1.5, 1.9)                                | 1.7(1.5, 1.9)                | 1.3(0.9, 1.8)             | 1.1(0.8, 1.5) | 1.6(1.2, 2.0)  |
| Year 3                               | 1.8(1.2,2.6)                                 | 1.2(0.8,1.7)                 | 1.1(0.7, 1.5)             | 1.1(0.8, 1.6) | 1.7(1.2, 2.3)  |
| <b>Major</b>                         |                                              |                              |                           |               |                |
| Clinic medicine                      | Reference                                    | Reference                    | Reference                 | Reference     | Reference      |
| Non-clinic medicine                  | 1.1(0.8, 1.4)                                | 1.7(0.5, 1.9)                | 1.2(0.9, 1.6)             | 1.1(0.8, 1.4) | 0.8(0.6, 1.1)  |
| <b>Access to TB health education</b> |                                              |                              |                           |               |                |
| Yes                                  | Reference                                    | Reference                    | Reference                 | Reference     | Reference      |
| No                                   | 0.5(0.4, 0.7)                                | 0.4(0.3, 0.5)                | 0.6(0.5, 0.7)             | 0.6(0.5, 0.8) | 0.7(0.5, 0.8)  |

## Figure legends

### **Fig. 1: The Southwestern People's Republic of China.**

In this this figure demonstrated Southwest China. The place marked with red color is Southwest China which includes the municipality of Chongqing, the provinces of Sichuan, Yunnan and Guizhou, and the Tibet Autonomous Regions.

### **Fig. 2: Knowledge of TB symptoms and transmission among undergraduate medical students in Southwest China.**

Figure 2A presents undergraduate medical students' knowledge of classical symptoms of TB; Figure 2B presents students' knowledge of means of TB transmission.

### **Fig. 3: Knowledge of TB free policy and DOTS among undergraduate medical students in Southwest China.**

Figure 3A presents undergraduate medical students' knowledge of the free TB treatment policy in China; Figure 3B presents undergraduate medical students' knowledge of the contents of the Directly Observed Therapy-Short Course (DOTS) program.

### **Fig. 4: Knowledge of core TB knowledge among undergraduate medical students in Southwest China.**

Figure 4A presents the percentage of undergraduate medical students correctly answered each question for core TB knowledge; Figure 4B presents percentage of undergraduate medical students correctly answered none, only one question, any 2, any 3, any 4 and any 5 questions for core TB knowledge.

1  
2  
3  
4  
5  
6  
7  
8  
9  
10  
11  
12  
13  
14  
15  
16  
17  
18  
19  
20  
21  
22  
23  
24  
25  
26  
27  
28  
29  
30  
31  
32  
33  
34  
35  
36  
37  
38  
39  
40  
41  
42  
43  
44  
45  
46  
47  
48  
49  
50  
51  
52  
53  
54  
55  
56  
57  
58  
59  
60

This figure presents undergraduate medical students' knowledge of core TB symptoms

**Fig. 5: Sources of TB knowledge among undergraduate medical students in Southwest China.**

This figure presents undergraduate medical students' major sources of information on TB.

For peer review only
